# Supplementary material for: Bourdieu, networks, and movements: Using the concepts of habitus, field and capital to understand a network analysis of gender differences in undergraduate physics
Source: PLoS One. 2019 Sep 12;14(9):e0222357. doi: 10.1371/journal.pone.0222357 (PMC6742474; doi:10.1371/journal.pone.0222357)
Supplement: S7 Table — Spreadsheet of Odds Ratios for whole student population. (CSV) [file pone.0222357.s007.csv]

	Source	Target_Label	Male.Source_Pop	Male.SourceTarget_Pop	Male.Target_Pop	Female.Source_Pop	Female.SourceTarget_Pop	Female.Target_Pop	Male.Not_target	Female.Not_target	Male.Percent_from_source_to_target	Female.Percent_from_source_to_target	OR	stdErrorLogOR	UpperCI	LowerCI	Significant
1	AP1_Low	AP2	473	191	965	152	43	221	282	109	40.3805496828753	28.2894736842105	0.582448724722609	0.203006963587742	0.982385783972825	0.345329220419967	1
2	AP1_Low	Computer Science	473	384	3166	152	115	1224	89	37	81.183932346723	75.6578947368421	0.720368806306306	0.222627044457286	1.27796973269923	0.406059082481654	0
3	AP1_Low	Geography-Geology	473	142	913	152	51	554	331	101	30.0211416490486	33.5526315789474	1.17703249198159	0.198927712482815	1.96449515414581	0.705222145372403	0
4	AP1_Low	Liberal Arts	473	440	3933	152	146	2408	33	6	93.0232558139535	96.0526315789474	1.825	0.45397328039315	5.87414891524984	0.566997031919532	0
5	AP1_Low	PLS	473	38	1953	152	17	2274	435	135	8.0338266384778	11.1842105263158	1.44152046783626	0.30797009086528	3.18585730056827	0.652251831499235	0
6	AP2_Low	Computer Science	383	343	3166	82	70	1224	40	12	89.556135770235	85.3658536585366	0.680272108843538	0.354308480725612	1.69398194349265	0.273184813951614	0
7	AP2_Low	Geography-Geology	383	86	913	82	17	554	297	65	22.4543080939948	20.7317073170732	0.903220035778175	0.298668805100445	1.94893503958336	0.41859087987126	0
8	AP2_Low	Liberal Arts	383	353	3933	82	79	2408	30	3	92.1671018276762	96.3414634146341	2.23796033994334	0.618189093809143	10.9945731942542	0.455539873596617	0
9	AP2_Low	PLS	383	44	1953	82	10	2274	339	72	11.4882506527415	12.1951219512195	1.07007575757576	0.373585350520515	2.80025847390758	0.408913012002593	0
10	Computer Science_Low	Geography-Geology	1126	256	913	345	95	554	870	250	22.7353463587922	27.536231884058	1.29140625	0.139935667636346	1.85162954232106	0.900682379720798	0
11	Computer Science_Low	Liberal Arts	1126	1059	3933	345	329	2408	67	16	94.0497335701599	95.3623188405797	1.30093248347498	0.285322929109119	2.71227521333072	0.623987314503398	0
12	Geography-Geology_Low	Computer Science	324	217	3166	166	90	1224	107	76	66.9753086419753	54.2168674698795	0.583919476109629	0.195507276517658	0.966029456462961	0.352951923255579	1
13	Geography-Geology_Low	Liberal Arts	324	311	3933	166	159	2408	13	7	95.9876543209877	95.7831325301205	0.949471750114837	0.478837093425229	3.25813848044498	0.276690696137326	0
14	Liberal Arts_Low	Computer Science	1620	1261	3166	764	395	1224	359	369	77.8395061728395	51.7015706806283	0.304754474983291	0.0939159698975826	0.388129899008562	0.239289192251309	1
15	Liberal Arts_Low	Geography-Geology	1620	431	913	764	233	554	1189	531	26.6049382716049	30.4973821989529	1.21050331860824	0.096624599212487	1.55246591843079	0.943865025934146	0
16	PLS_Low	AP1	734	38	1322	976	17	368	696	959	5.17711171662125	1.74180327868852	0.324680313923495	0.296004819829365	0.69579387497312	0.151506516572213	1
17	PLS_Low	AP2	734	54	965	976	12	221	680	964	7.35694822888283	1.22950819672131	0.156754264638082	0.323047650487488	0.36015233177545	0.0682264067570888	1
18	PLS_Low	Computer Science	734	384	3166	976	291	1224	350	685	52.3160762942779	29.8155737704918	0.387203467153285	0.101772244031693	0.503213150187987	0.29793840824612	1
19	PLS_Low	Geography-Geology	734	110	913	976	139	554	624	837	14.9863760217984	14.2418032786885	0.942065819485174	0.13813928090162	1.34450849298206	0.660083601460831	0
20	PLS_Low	Liberal Arts	734	586	3933	976	722	2408	148	254	79.8365122615804	73.9754098360656	0.717905995538954	0.117410778140924	0.971334975538234	0.530598641467831	1
21	Biological Science_Low	Chemistry	974	340	839	943	380	820	634	563	34.9075975359343	40.2969247083775	1.25859366837321	0.0944787881933471	1.6052473245539	0.98679997645182	0
22	Biological Science_Low	Computer Science	974	603	3166	943	401	1224	371	542	61.9096509240246	42.5238600212089	0.455199402740296	0.0932339885378716	0.578716714621986	0.358044775655855	1
23	Biological Science_Low	Liberal Arts	974	868	3933	943	824	2408	106	119	89.1170431211499	87.3806998939555	0.845602757231925	0.142137220932511	1.21932540629058	0.586425919897408	0
24	Biological Science_Low	Psychology	974	214	694	943	258	746	760	685	21.9712525667351	27.3594909862142	1.33760829524524	0.106416679504636	1.75928260409153	1.0170031508001	1
25	Biological Science_Low	Statistics	974	205	934	943	197	532	769	746	21.047227926078	20.8907741251326	0.990603544105146	0.112227730990291	1.32252862112884	0.741984230750405	0
26	Chemistry_Low	Biological Science	338	276	2721	317	298	2890	62	19	81.6568047337278	94.006309148265	3.52326468344775	0.275208110907394	7.15669950890625	1.73451379566547	1
27	Chemistry_Low	Computer Science	338	244	3166	317	151	1224	94	166	72.189349112426	47.6340694006309	0.350434524985187	0.165478915484456	0.536615644156194	0.228849750541094	1
28	Chemistry_Low	Liberal Arts	338	307	3933	317	276	2408	31	41	90.8284023668639	87.0662460567823	0.679748947326607	0.252049252755475	1.30082032118443	0.355205575948347	0
29	Chemistry_Low	Psychology	338	53	694	317	70	746	285	247	15.6804733727811	22.0820189274448	1.52394775036284	0.201769655151096	2.56218659899058	0.906419831698023	0
30	Chemistry_Low	Statistics	338	79	934	317	75	532	259	242	23.3727810650888	23.6593059936909	1.01605816508003	0.184349658115759	1.63334648141211	0.63206074557632	0
31	Computer Science_Low	Biological Science	1126	371	2721	345	211	2890	755	134	32.9484902309059	61.1594202898551	3.20442933580078	0.127365396246668	4.44820175942229	2.30843111969684	1
32	Computer Science_Low	Chemistry	1126	168	839	345	80	820	958	265	14.9200710479574	23.1884057971014	1.7214734950584	0.152544443340812	2.54971744935822	1.16227427275697	1
33	Computer Science_Low	Psychology	1126	148	694	345	84	746	978	261	13.1438721136767	24.3478260869565	2.12674743709226	0.153347419846456	3.15649865871001	1.4329341305746	1
34	Computer Science_Low	Statistics	1126	285	934	345	110	532	841	235	25.3108348134991	31.8840579710145	1.3812616648003	0.134328183237035	1.95207401186766	0.977362423272829	0
35	HighSchool_Low	Biological Science	1576	660	2721	758	556	2890	916	202	41.8781725888325	73.3509234828496	3.82010201020102	0.0967259570772198	4.90054520854508	2.97786853244324	1
36	HighSchool_Low	Chemistry	1576	291	839	758	257	820	1285	501	18.4644670050761	33.9050131926121	2.26519469651762	0.10050718780893	2.93429354042077	1.74866861220563	1
37	HighSchool_Low	Computer Science	1576	1232	3166	758	401	1224	344	357	78.1725888324873	52.9023746701847	0.313634544726982	0.0949397234569837	0.400493775950883	0.2456133741718	1
38	HighSchool_Low	Liberal Arts	1576	1429	3933	758	687	2408	147	71	90.6725888324873	90.6332453825857	0.995367586907027	0.151797965300466	1.47143274808204	0.673327839384121	0
39	HighSchool_Low	Psychology	1576	239	694	758	219	746	1337	539	15.1649746192893	28.8918205804749	2.27294462859316	0.10655299709518	2.99052857165923	1.72754653930095	1
40	HighSchool_Low	Statistics	1576	393	934	758	181	532	1183	577	24.9365482233503	23.8786279683377	0.94426731228033	0.103188186975006	1.23166091799346	0.723933628172371	0
41	Liberal Arts_Low	Biological Science	1620	666	2721	764	548	2890	954	216	41.1111111111111	71.7277486910995	3.63413413413413	0.0948902875890331	4.6399953807679	2.84632414929111	1
42	Liberal Arts_Low	Chemistry	1620	242	839	764	199	820	1378	565	14.9382716049383	26.0471204188482	2.00557302713377	0.107948867258804	2.64824763694618	1.51886217551952	1
43	Liberal Arts_Low	Psychology	1620	255	694	764	216	746	1365	548	15.7407407407407	28.2722513089005	2.10991841992271	0.105397421732837	2.76778578281428	1.60841773462779	1
44	Liberal Arts_Low	Statistics	1620	305	934	764	160	532	1315	604	18.8271604938272	20.9424083769633	1.1421126913473	0.109292149477569	1.51332175156988	0.861959063486271	0
45	Psychology_Mid	Biological Science	233	151	2721	248	205	2890	82	43	64.8068669527897	82.6612903225807	2.58894193747112	0.216682950970968	4.52314646683007	1.4818490634229	1
46	Psychology_Mid	Chemistry	233	36	839	248	53	820	197	195	15.450643776824	21.3709677419355	1.48732193732194	0.238432484293278	2.74818527081398	0.804940834496167	0
47	Psychology_Mid	Computer Science	233	140	3166	248	94	1224	93	154	60.0858369098712	37.9032258064516	0.405473098330241	0.187155950161215	0.65653834551538	0.250417107534618	1
48	Psychology_Mid	Liberal Arts	233	208	3933	248	220	2408	25	28	89.2703862660944	88.7096774193548	0.944368131868132	0.291663217714254	2.00129319070201	0.445627443610733	0
49	Psychology_Mid	Statistics	233	64	934	248	49	532	169	199	27.4678111587983	19.758064516129	0.650204145728643	0.216738203039428	1.13613480289152	0.372108512164891	0
50	Statistics_Low	Biological Science	343	145	2721	170	116	2890	198	54	42.2740524781341	68.2352941176471	2.93333333333333	0.197702465711316	4.88038095819827	1.76306819450034	1
51	Statistics_Low	Chemistry	343	70	839	170	51	820	273	119	20.4081632653061	30	1.67142857142857	0.21438265422023	2.9029110021279	0.962369658367042	0
52	Statistics_Low	Computer Science	343	296	3166	170	128	1224	47	42	86.2973760932945	75.2941176470588	0.483912483912484	0.237227734324179	0.891375243827354	0.262707870459666	1
53	Statistics_Low	Liberal Arts	343	311	3933	170	162	2408	32	8	90.6705539358601	95.2941176470588	2.08360128617363	0.406986822378531	5.94225595572071	0.730596990788471	0
54	Statistics_Low	Psychology	343	56	694	170	57	746	287	113	16.3265306122449	33.5294117647059	2.58517699115044	0.218483135701319	4.53755376509526	1.47285088432078	1
55	AP1_Low	Biological Science	473	173	2721	152	83	2890	300	69	36.5750528541226	54.6052631578947	2.08595124403116	0.188824327215577	3.39209466528482	1.28274503568721	1
56	AP1_Low	Engineering	473	15	612	152	8	346	458	144	3.17124735729387	5.26315789473684	1.6962962962963	0.448101012300406	5.37795038249263	0.535040474563634	0
57	AP1_Low	Physics-Maths	473	213	1600	152	68	551	260	84	45.0317124735729	44.7368421052632	0.988151128996199	0.187487689688172	1.60137265781699	0.609753544229713	0
58	AP2_Low	Biological Science	383	123	2721	82	37	2890	260	45	32.1148825065274	45.1219512195122	1.73803071364047	0.247437839459158	3.28676939362344	0.919063797849057	0
59	AP2_Low	Engineering	383	31	612	82	5	346	352	77	8.09399477806789	6.09756097560976	0.737327188940092	0.498082309055493	2.65870299365957	0.204479923047737	0
60	AP2_Low	Physics-Maths	383	215	1600	82	52	551	168	30	56.1357702349869	63.4146341463415	1.35441860465116	0.251331745522091	2.58713615664361	0.709065795363898	0
61	Biological Science_Mid	Computer Science	795	358	3166	966	239	1224	437	727	45.0314465408805	24.7412008281573	0.401293292247163	0.10315639507892	0.523386543196377	0.307681403918222	1
62	Biological Science_Mid	Engineering	795	102	612	966	84	346	693	882	12.8301886792453	8.69565217391304	0.647058823529412	0.155837966376822	0.966537377690338	0.433180475759527	1
63	Biological Science_Mid	Liberal Arts	795	585	3933	966	667	2408	210	299	73.5849056603774	69.0476190476191	0.800788954635108	0.106372169534471	1.05311295021608	0.608921340995772	0
64	Biological Science_Mid	Physics-Maths	795	184	1600	966	93	551	611	873	23.1446540880503	9.62732919254658	0.35374645151651	0.137730197720571	0.50433245169318	0.248123140877422	1
65	Computer Science_Mid	Biological Science	1093	375	2721	362	216	2890	718	146	34.3092406221409	59.6685082872928	2.83265753424658	0.124652994448415	3.90476182751588	2.05491373373432	1
66	Computer Science_Mid	Engineering	1093	97	612	362	42	346	996	320	8.87465690759378	11.6022099447514	1.34768041237113	0.195570494257943	2.22994946612555	0.81447697424484	0
67	Computer Science_Mid	Liberal Arts	1093	1000	3933	362	345	2408	93	17	91.4913083257091	95.3038674033149	1.88735294117647	0.271062295991983	3.79301303511772	0.939121772476829	0
68	Computer Science_Mid	Physics-Maths	1093	444	1600	362	122	551	649	240	40.6221408966148	33.7016574585635	0.743036786786787	0.127108112564466	1.03075718735385	0.535629218299012	0
69	Engineering_Low	Biological Science	186	78	2721	134	108	2890	108	26	41.9354838709677	80.5970149253731	5.75147928994083	0.264197974633739	11.3562343403882	2.91289462960197	1
70	Engineering_Low	Computer Science	186	117	3166	134	61	1224	69	73	62.9032258064516	45.5223880597015	0.492799438004917	0.230503438000682	0.892162797788051	0.272205125230582	1
71	Engineering_Low	Liberal Arts	186	149	3933	134	106	2408	37	28	80.1075268817204	79.1044776119403	0.940076701821668	0.280867734710552	1.93758161942961	0.456106827421322	0
72	Engineering_Low	Physics-Maths	186	97	1600	134	38	551	89	96	52.1505376344086	28.3582089552239	0.363187285223368	0.241407724704588	0.676236948110803	0.195057375253484	1
73	Liberal Arts_Low	Engineering	1620	59	612	764	35	346	1561	729	3.64197530864198	4.58115183246073	1.27025644602544	0.218020499533129	2.22692473783153	0.724564872470888	0
74	Liberal Arts_Low	Physics-Maths	1620	457	1600	764	130	551	1163	634	28.2098765432099	17.0157068062827	0.521816261588055	0.110984790822223	0.694436949761241	0.392105015367273	1
75	Physics-Maths_Mid	Biological Science	554	194	2721	180	88	2890	360	92	35.0180505415162	48.8888888888889	1.77498879426266	0.173682522246953	2.77604320032971	1.13491937711338	1
76	Physics-Maths_Mid	Computer Science	554	478	3166	180	133	1224	76	47	86.2815884476534	73.8888888888889	0.449924330098816	0.209869811271677	0.772393532535663	0.262083891549832	1
77	Physics-Maths_Mid	Engineering	554	108	612	180	29	346	446	151	19.4945848375451	16.1111111111111	0.793107677213638	0.229361476500759	1.43162407992512	0.439374970340057	0
78	Physics-Maths_Mid	Liberal Arts	554	451	3933	180	150	2408	103	30	81.4079422382672	83.3333333333333	1.14190687361419	0.227872843411187	2.05334902921202	0.635036367152706	0
79	Computer Science_Top	Geography-Geology	947	131	913	517	73	554	816	444	13.8331573389652	14.1199226305609	1.02413864245925	0.157511778516962	1.53640418311694	0.682671897475856	0
80	Computer Science_Top	Liberal Arts	947	783	3933	517	434	2408	164	83	82.6821541710665	83.9458413926499	1.09520072627675	0.147400951219134	1.60078655852156	0.749297040540445	0
81	Computer Science_Top	Medical Science	947	254	1800	517	266	2282	693	251	26.8215417106653	51.4506769825919	2.89139504972237	0.114557721513121	3.88345505200977	2.15276479876662	1
82	Computer Science_Top	Psychology	947	129	694	517	97	746	818	420	13.6219640971489	18.7620889748549	1.46448874123293	0.147189206817261	2.13938500527949	1.00249710449748	1
83	Geography-Geology_Top	Computer Science	246	136	3166	207	72	1224	110	135	55.2845528455285	34.7826086956522	0.431372549019608	0.194268233542378	0.711384307737249	0.261577707047769	1
84	Geography-Geology_Top	Liberal Arts	246	202	3933	207	160	2408	44	47	82.1138211382114	77.2946859903382	0.741520960606699	0.234956088496252	1.35792809414995	0.404920803529942	0
85	Geography-Geology_Top	Medical Science	246	40	1800	207	83	2282	206	124	16.260162601626	40.0966183574879	3.44717741935484	0.223533169422695	6.12974817363167	1.93858406967306	1
86	Geography-Geology_Top	Psychology	246	40	694	207	42	746	206	165	16.260162601626	20.2898550724638	1.31090909090909	0.244385962776442	2.45963930007479	0.698672624305461	0
87	HighSchool_Mid	Computer Science	1393	892	3166	954	318	1224	501	636	64.0344580043073	33.3333333333333	0.280829596412556	0.088510255616461	0.352715567779985	0.223594503405739	1
88	HighSchool_Mid	Geography-Geology	1393	234	913	954	164	554	1159	790	16.7982770997846	17.1907756813417	1.02821594720329	0.111802060819795	1.37124010557406	0.771001394858238	0
89	HighSchool_Mid	Liberal Arts	1393	1140	3933	954	710	2408	253	244	81.83776022972	74.4234800838574	0.645779407535232	0.101668940745833	0.839037577148396	0.497035001237849	1
90	HighSchool_Mid	Medical Science	1393	530	1800	954	674	2282	863	280	38.0473797559225	70.6498951781971	3.91955525606469	0.0900036060446781	4.94183874654939	3.10874437497002	1
91	HighSchool_Mid	PLS	1393	540	1953	954	649	2274	853	305	38.7652548456569	68.0293501048218	3.36124468731026	0.0885646959476762	4.222238510342	2.6758236940661	1
92	HighSchool_Mid	Psychology	1393	213	694	954	230	746	1180	724	15.2907394113424	24.1090146750524	1.75991492231474	0.106166543055897	2.31322884429129	1.33895119863725	1
93	Liberal Arts_Top	Computer Science	1026	610	3166	877	305	1224	416	572	59.4541910331384	34.7776510832383	0.363636363636364	0.0952372337323126	0.464699167292469	0.284552704772666	1
94	Liberal Arts_Top	Geography-Geology	1026	132	913	877	92	554	894	785	12.8654970760234	10.4903078677309	0.793746381007527	0.144352957628618	1.15109950595787	0.54733175898488	0
95	Liberal Arts_Top	Medical Science	1026	443	1800	877	640	2282	583	237	43.17738791423	72.976054732041	3.55382842338867	0.0987649304764845	4.58296032043818	2.75579441667034	1
96	Liberal Arts_Top	Psychology	1026	169	694	877	243	746	857	634	16.4717348927875	27.7080957810718	1.94361898717638	0.113033332740976	2.60026281961497	1.4527972860343	1
97	Medical Science_Mid	Computer Science	559	160	3166	799	138	1224	399	661	28.6225402504472	17.2715894868586	0.520631618759455	0.13234614380419	0.732039186676487	0.370277011648395	1
98	Medical Science_Mid	Geography-Geology	559	33	913	799	43	554	526	756	5.90339892665474	5.38172715894869	0.906605739939073	0.238291284489552	1.67456335606299	0.490834798644404	0
99	Medical Science_Mid	Liberal Arts	559	354	3933	799	477	2408	205	322	63.3273703041145	59.6996245306633	0.857853458258764	0.113599884059633	1.14935131901071	0.640285127509965	0
100	Medical Science_Mid	Psychology	559	102	694	799	186	746	457	613	18.2468694096601	23.279098873592	1.35946646195183	0.137839656240136	1.93872284740829	0.95328172546295	0
101	PLS_Mid	Computer Science	649	207	3166	833	149	1224	442	684	31.8952234206472	17.8871548619448	0.465138288555527	0.123558726981856	0.63937969391831	0.338380510889367	1
102	PLS_Mid	Geography-Geology	649	35	913	833	29	554	614	804	5.39291217257319	3.48139255702281	0.632764747690121	0.256761821113965	1.22569142928437	0.326665599801995	0
103	PLS_Mid	Liberal Arts	649	393	3933	833	439	2408	256	394	60.5546995377504	52.7010804321729	0.725797910127743	0.106144969999028	0.953934406807183	0.55222099400832	1
104	PLS_Mid	Medical Science	649	564	1800	833	801	2282	85	32	86.9029275808937	96.1584633853541	3.77244015957447	0.214560469281808	6.55491570616475	2.17108890419232	1
105	PLS_Mid	Psychology	649	97	694	833	145	746	552	688	14.9460708782743	17.406962785114	1.19935267321985	0.143076597141688	1.73360700143646	0.82974216968881	0
106	Psychology_Top	Computer Science	143	54	3166	256	49	1224	89	207	37.7622377622378	19.140625	0.390141349078547	0.2345070461935	0.713630092916524	0.21329015378088	1
107	Psychology_Top	Geography-Geology	143	21	913	256	24	554	122	232	14.6853146853147	9.375	0.600985221674877	0.319049808689452	1.36665797199469	0.264282098427627	0
108	Psychology_Top	Liberal Arts	143	119	3933	256	216	2408	24	40	83.2167832167832	84.375	1.0890756302521	0.282311277920019	2.25304093738323	0.526437717455136	0
109	Psychology_Top	Medical Science	143	107	1800	256	219	2282	36	37	74.8251748251748	85.546875	1.99141197272038	0.26213891211148	3.91122889437537	1.01393238600714	1
110	Biological Science_Low	Finance-Marketing	974	157	1009	943	93	413	817	850	16.1190965092402	9.86214209968187	0.569359310603222	0.139723211099477	0.815905860067059	0.39731302400982	1
111	Biological Science_Low	Geography-Geology	974	253	913	943	223	554	721	720	25.9753593429158	23.6479321314952	0.882647123407993	0.105890157916569	1.15932433390255	0.671999993166613	0
112	Biological Science_Low	Japanese	974	13	53	943	10	32	961	933	1.3347022587269	1.06044538706257	0.792315937010471	0.42312583354199	2.35550222799342	0.266509849398679	0
113	Biological Science_Low	Sports Science	974	46	130	943	55	117	928	888	4.72279260780287	5.83244962884411	1.24951037994516	0.205242931546067	2.11965285422469	0.736571644964845	0
114	Computer Science_Low	Finance-Marketing	1126	249	1009	345	53	413	877	292	22.113676731794	15.3623188405797	0.63928316003741	0.165677087054199	0.979425313967893	0.417268119252239	1
115	Computer Science_Low	Japanese	1126	12	53	345	9	32	1114	336	1.06571936056838	2.60869565217391	2.48660714285714	0.44532942973585	7.82749448493044	0.789935412258947	0
116	Computer Science_Low	Sports Science	1126	30	130	345	12	117	1096	333	2.66429840142096	3.47826086956522	1.31651651651652	0.347249302992524	3.21927507061014	0.538386966085595	0
117	Finance-Marketing_Low	Biological Science	374	110	2721	102	52	2890	264	50	29.4117647058824	50.9803921568627	2.496	0.228275178478864	4.49289848182194	1.38663627170887	1
118	Finance-Marketing_Low	Computer Science	374	330	3166	102	76	1224	44	26	88.2352941176471	74.5098039215686	0.38974358974359	0.278167231995353	0.797729592168207	0.190415483188181	1
119	Finance-Marketing_Low	Geography-Geology	374	63	913	102	20	554	311	82	16.8449197860963	19.6078431372549	1.20402632597755	0.285102739214895	2.50881559068961	0.577834177620247	0
120	Finance-Marketing_Low	Japanese	374	10	53	102	2	32	364	100	2.67379679144385	1.96078431372549	0.728	0.78278174017235	5.46415096087556	0.0969929278665239	0
121	Finance-Marketing_Low	Liberal Arts	374	350	3933	102	96	2408	24	6	93.5828877005348	94.1176470588235	1.09714285714286	0.470751678549469	3.68730179741997	0.326450753182678	0
122	Finance-Marketing_Low	Psychology	374	57	694	102	28	746	317	74	15.2406417112299	27.4509803921569	2.10431484115695	0.264435687851345	4.15749121581891	1.06509929205976	1
123	Finance-Marketing_Low	Sports Science	374	9	130	102	4	117	365	98	2.40641711229947	3.92156862745098	1.65532879818594	0.611600293305327	7.99543228271491	0.342709853978437	0
124	Geography-Geology_Low	Biological Science	324	144	2721	166	117	2890	180	49	44.4444444444444	70.4819277108434	2.98469387755102	0.203605431686669	5.04189082085082	1.76687632858882	1
125	Geography-Geology_Low	Finance-Marketing	324	46	1009	166	16	413	278	150	14.1975308641975	9.63855421686747	0.64463768115942	0.307413271352438	1.42265140766145	0.292100888336158	0
126	Geography-Geology_Low	Japanese	324	4	53	166	1	32	320	165	1.23456790123457	0.602409638554217	0.484848484848485	1.12213439750353	8.7196337365095	0.0269596247231795	0
127	Geography-Geology_Low	Psychology	324	60	694	166	50	746	264	116	18.5185185185185	30.1204819277108	1.89655172413793	0.221529309820885	3.3550790367163	1.07207860171632	1
128	Geography-Geology_Low	Sports Science	324	12	130	166	5	117	312	161	3.7037037037037	3.01204819277108	0.807453416149068	0.541063435895168	3.25231949612676	0.200466473243866	0
129	Japanese_Low	Biological Science	17	6	2721	12	7	2890	11	5	35.2941176470588	58.3333333333333	2.56666666666667	0.774876054884199	18.8764267469045	0.348994958956312	0
130	Japanese_Low	Computer Science	17	16	3166	12	9	1224	1	3	94.1176470588235	75	0.1875	1.22757665522135	4.42395217417862	0.00794679703031088	0
131	Japanese_Low	Finance-Marketing	17	10	1009	12	3	413	7	9	58.8235294117647	25	0.233333333333333	0.829036541596079	1.97285525609081	0.0275967759298903	0
132	Japanese_Low	Geography-Geology	17	4	913	12	3	554	13	9	23.5294117647059	25	1.08333333333333	0.878275310689946	10.3978768129059	0.112870264980868	0
133	Japanese_Low	Liberal Arts	17	16	3933	12	11	2408	1	1	94.1176470588235	91.6666666666667	0.6875	1.46744985975981	30.0838938179858	0.0157112723791566	0
134	Japanese_Low	Psychology	17	4	694	12	3	746	13	9	23.5294117647059	25	1.08333333333333	0.878275310689946	10.3978768129059	0.112870264980868	0
135	Japanese_Low	Sports Science	17	2	130	12	NA	NA	15	NA	11.7647058823529	NA	NA	NA	NA	NA	NA
136	Liberal Arts_Low	Finance-Marketing	1620	336	1009	764	110	413	1284	654	20.7407407407407	14.3979057591623	0.642747924858017	0.119895653608645	0.875227563964118	0.472019977339543	1
137	Liberal Arts_Low	Japanese	1620	22	53	764	17	32	1598	747	1.35802469135802	2.22513089005236	1.65303638797615	0.325948684887316	3.82642786429902	0.714120165564342	0
138	Liberal Arts_Low	Sports Science	1620	57	130	764	40	117	1563	724	3.51851851851852	5.23560209424084	1.51497528351265	0.211103932659368	2.6090645598735	0.879683141978486	0
139	Psychology_Low	Biological Science	318	186	2721	242	189	2890	132	53	58.4905660377358	78.099173553719	2.53073645769933	0.192642237012256	4.15604587189647	1.54103857747028	1
140	Psychology_Low	Computer Science	318	225	3166	242	121	1224	93	121	70.7547169811321	50	0.413333333333333	0.178118101933302	0.653869952574258	0.261281993111684	1
141	Psychology_Low	Finance-Marketing	318	63	1009	242	35	413	255	207	19.811320754717	14.4628099173554	0.684380032206119	0.230644598779793	1.23945024295173	0.377890142138355	0
142	Psychology_Low	Geography-Geology	318	79	913	242	71	554	239	171	24.8427672955975	29.3388429752066	1.25612554593234	0.191767537725078	2.05820332445953	0.766615896686569	0
143	Psychology_Low	Japanese	318	3	53	242	6	32	315	236	0.943396226415094	2.47933884297521	2.66949152542373	0.712328499577405	16.7121149207559	0.426408329412491	0
144	Psychology_Low	Liberal Arts	318	297	3933	242	231	2408	21	11	93.3962264150943	95.4545454545455	1.48484848484848	0.382392659741458	3.97479762745582	0.55468862307037	0
145	Psychology_Low	Sports Science	318	34	130	242	31	117	284	211	10.6918238993711	12.8099173553719	1.22720936715919	0.264443363455137	2.42464335980229	0.621139939923394	0
146	Sports Science_Low	Biological Science	54	30	2721	45	37	2890	24	8	55.5555555555556	82.2222222222222	3.7	0.476473532346789	12.6196126770696	1.08481934828914	1
147	Sports Science_Low	Computer Science	54	40	3166	45	20	1224	14	25	74.0740740740741	44.4444444444444	0.28	0.431773750277355	0.851165860368653	0.0921089574316852	1
148	Sports Science_Low	Finance-Marketing	54	11	1009	45	5	413	43	40	20.3703703703704	11.1111111111111	0.488636363636364	0.582378661063899	2.18909530000154	0.109070398108114	0
149	Sports Science_Low	Geography-Geology	54	14	913	45	16	554	40	29	25.9259259259259	35.5555555555556	1.57635467980296	0.439785550068736	4.89181210362058	0.507970057700608	0
150	Sports Science_Low	Japanese	54	4	53	45	NA	NA	50	NA	7.40740740740741	NA	NA	NA	NA	NA	NA
151	Sports Science_Low	Liberal Arts	54	52	3933	45	43	2408	2	2	96.2962962962963	95.5555555555556	0.826923076923077	1.02102232256903	11.4625921605303	0.0596550732654081	0
152	Sports Science_Low	Psychology	54	26	694	45	32	746	28	13	48.1481481481481	71.1111111111111	2.6508875739645	0.427023302758645	7.96040216718259	0.882770089025101	0
153	Computer Science_Low	Physics-Maths	1126	433	1600	345	104	551	693	241	38.4547069271758	30.1449275362319	0.690655754985482	0.132352682156116	0.971119638532422	0.491191149851966	1
154	HighSchool_Low	Physics-Maths	1576	513	1600	758	144	551	1063	614	32.5507614213198	18.9973614775726	0.485970626892965	0.107066149882642	0.640240264720846	0.368873160930786	1
155	HighSchool_Low	PLS	1576	282	1953	758	300	2274	1294	458	17.8934010152284	39.5778364116095	3.00566756480535	0.099174776353156	3.88015361277985	2.32826800474291	1
156	Physics-Maths_Low	Computer Science	565	488	3166	160	132	1224	77	28	86.3716814159292	82.5	0.743852459016394	0.241508253699382	1.38537544411518	0.39939821593859	0
157	Physics-Maths_Low	Statistics	565	176	934	160	60	532	389	100	31.1504424778761	37.5	1.32613636363636	0.186866741117537	2.14566941052462	0.819621907425472	0
158	PLS_Low	Physics-Maths	734	130	1600	976	73	551	604	903	17.7111716621253	7.47950819672131	0.375602691881762	0.155415529083929	0.560442640844821	0.25172492574113	1
159	PLS_Low	Statistics	734	147	934	976	153	532	587	823	20.0272479564033	15.6762295081967	0.742356237756342	0.127504169117351	1.03086390070133	0.534593153723615	0
160	Statistics_Low	Physics-Maths	343	167	1600	170	54	551	176	116	48.6880466472303	31.7647058823529	0.490604996902746	0.197000127684235	0.814777154546972	0.295409930976492	1
161	Physics-Maths_Mid	Statistics	554	185	934	180	74	532	369	106	33.3935018050542	41.1111111111111	1.39245283018868	0.176246725596083	2.19219239453642	0.884468392980848	0
162	HighSchool_Low	AP2	1576	371	965	758	68	221	1205	690	23.5406091370558	8.97097625329815	0.320090628540177	0.140287030846367	0.459364160874577	0.223043108727023	1
163	Computer Science_Top	Biological Science	947	386	2721	517	345	2890	561	172	40.7602956705385	66.7311411992263	2.91518556452585	0.114392783786545	3.91374569827312	2.17139986365737	1
164	Computer Science_Top	Statistics	947	224	934	517	127	532	723	390	23.6536430834213	24.5647969052224	1.05106456043956	0.127614771444662	1.45996367329898	0.756687806975163	0
165	PLS_Low	Biological Science	734	566	2721	976	925	2890	168	51	77.1117166212534	94.7745901639344	5.3834961546456	0.168546995295122	8.30906027528557	3.48800344285479	1
166	PLS_Low	Psychology	734	151	694	976	244	746	583	732	20.5722070844687	25	1.28697571743929	0.117483034080745	1.74161679378496	0.951016608928551	0
167	Psychology_Low	Statistics	318	68	934	242	62	532	250	180	21.3836477987421	25.6198347107438	1.26633986928105	0.200973804677528	2.12471631339492	0.754743894241788	0
168	Statistics_Top	Biological Science	281	99	2721	201	143	2890	182	58	35.2313167259786	71.1442786069652	4.53256704980843	0.199574301699561	7.57756784607317	2.71118180375718	1
169	Statistics_Top	Computer Science	281	212	3166	201	111	1224	69	90	75.4448398576512	55.2238805970149	0.401415094339623	0.198317560683324	0.668919523151244	0.240887090878428	1
170	Statistics_Top	Liberal Arts	281	229	3933	201	187	2408	52	14	81.4946619217082	93.0348258706468	3.03306300686213	0.316818159942423	6.85775249977783	1.34147028547525	1
171	Statistics_Top	Psychology	281	41	694	201	48	746	240	153	14.5907473309609	23.8805970149254	1.8364418938307	0.236487191227891	3.37631360050675	0.998876060834609	0
172	AP1_Low	Statistics	473	101	934	152	34	532	372	118	21.3530655391121	22.3684210526316	1.06125188790065	0.22466753908629	1.89263142809063	0.595073902322819	0
173	AP2_Top	Biological Science	305	91	2721	83	38	2890	214	45	29.8360655737705	45.7831325301205	1.98583638583639	0.253377031084467	3.81326597604727	1.03416498510274	1
174	AP2_Top	Computer Science	305	246	3166	83	60	1224	59	23	80.655737704918	72.289156626506	0.625662778366914	0.284884398886656	1.30295346191463	0.300435835719399	0
175	AP2_Top	Liberal Arts	305	232	3933	83	58	2408	73	25	76.0655737704918	69.8795180722892	0.73	0.274317980225353	1.47943173949008	0.360205872143635	0
176	AP2_Top	Physics-Maths	305	260	1600	83	70	551	45	13	85.2459016393443	84.3373493975904	0.931952662721894	0.342457540838521	2.25095576620742	0.385851991670988	0
177	AP2_Top	Statistics	305	57	934	83	7	532	248	76	18.6885245901639	8.43373493975904	0.400738688827331	0.421415656220345	1.18613438294418	0.135390642942526	0
178	Biological Science_Mid	Statistics	795	116	934	966	121	532	679	845	14.5911949685535	12.5258799171843	0.838186084472557	0.139790337533844	1.20134885798027	0.584805910070604	0
179	Computer Science_Mid	Statistics	1093	271	934	362	126	532	822	236	24.7941445562672	34.8066298342541	1.6194258552755	0.130691920119936	2.26733100363658	1.15666397915809	1
180	HighSchool_Mid	AP1	1393	426	1322	954	102	368	967	852	30.5814788226849	10.6918238993711	0.271754942802354	0.119829772980603	0.369984968836212	0.19960472764558	1
181	HighSchool_Mid	AP2	1393	287	965	954	52	221	1106	902	20.6030150753769	5.45073375262055	0.222162132929533	0.157251061587446	0.333062089452185	0.148188625697327	1
182	HighSchool_Mid	Biological Science	1393	725	2721	954	781	2890	668	173	52.045944005743	81.8658280922432	4.15952162647	0.0996848678826167	5.3767742298551	3.21784390071701	1
183	HighSchool_Mid	Physics-Maths	1393	444	1600	954	133	551	949	821	31.8736539842067	13.9412997903564	0.346251549966532	0.109739768639683	0.459319220657885	0.261017023590928	1
184	HighSchool_Mid	Statistics	1393	212	934	954	138	532	1181	816	15.218951902369	14.4654088050314	0.942112930077691	0.118471887764788	1.27817717727647	0.694408246993436	0
185	Liberal Arts_Mid	Biological Science	1287	570	2721	767	591	2890	717	176	44.2890442890443	77.0534550195567	4.2239533492823	0.102581439176525	5.50093846684688	3.24340692128119	1
186	Liberal Arts_Mid	Computer Science	1287	971	3166	767	408	1224	316	359	75.4467754467754	53.1942633637549	0.369856765417153	0.0971129177397177	0.474936719651436	0.288025796416067	1
187	Liberal Arts_Mid	Physics-Maths	1287	477	1600	767	156	551	810	611	37.0629370629371	20.3389830508475	0.433560818948214	0.106667340743643	0.570606874329904	0.329429931855965	1
188	Liberal Arts_Mid	Statistics	1287	303	934	767	192	532	984	575	23.5431235431235	25.03259452412	1.08439087387	0.10613224752035	1.42519544704721	0.825082321002939	0
189	Physics-Maths_Low	Biological Science	565	198	2721	160	100	2890	367	60	35.0442477876106	62.5	3.08922558922559	0.185585471838446	4.98185858430042	1.9156133357941	1
190	Physics-Maths_Low	Liberal Arts	565	493	3933	160	146	2408	72	14	87.2566371681416	91.25	1.52303680092727	0.306912321277391	3.35685815751993	0.691015523483582	0
191	Statistics_Top	Physics-Maths	281	152	1600	201	70	551	129	131	54.0925266903915	34.8258706467662	0.45349537967055	0.190394819847839	0.740445285547951	0.27774916445088	1
192	Computer Science_Mid	Geography-Geology	1093	199	913	362	81	554	894	281	18.2067703568161	22.3756906077348	1.29498023927466	0.148485998445505	1.8980876546954	0.883507047719029	0
193	Geography-Geology_Mid	Computer Science	343	233	3166	181	87	1224	110	94	67.9300291545189	48.0662983425414	0.436946397589261	0.188455048566959	0.709870300256712	0.268953574050343	1
194	Geography-Geology_Mid	Physics-Maths	343	137	1600	181	37	551	206	144	39.9416909620991	20.4419889502762	0.386354420113544	0.214767573149447	0.671679730817157	0.222233500718673	1
195	Physics-Maths_Mid	Geography-Geology	554	115	913	180	45	554	439	135	20.7581227436823	25	1.27246376811594	0.20150232289371	2.13789879993483	0.757362341574437	0
196	AP2_Mid	Geography-Geology	289	63	913	60	14	554	226	46	21.7993079584775	23.3333333333333	1.09178743961353	0.336846398967589	2.59917914923808	0.458606254073437	0
197	AP2_Mid	Liberal Arts	289	261	3933	60	59	2408	28	1	90.3114186851211	98.3333333333333	6.32950191570881	1.02785935607999	89.2962406189454	0.448648165065772	0
198	AP2_Mid	Physics-Maths	289	216	1600	60	41	551	73	19	74.7404844290657	68.3333333333333	0.729288499025341	0.308788086908196	1.61517521781182	0.329290413167175	0
199	AP2_Mid	PLS	289	26	1953	60	3	2274	263	57	8.99653979238754	5	0.532388663967611	0.627009579522367	2.67558535915103	0.105934833494213	0
200	Geography-Geology_Low	Physics-Maths	324	97	1600	166	27	551	227	139	29.9382716049383	16.2650602409639	0.454572424534599	0.242787656884532	0.849404458879494	0.24327172642801	1
201	HighSchool_Low	AP1	1576	560	1322	758	136	368	1016	622	35.5329949238579	17.9419525065963	0.396692696371153	0.108308007425534	0.524295279187617	0.300145932265591	1
202	HighSchool_Low	Geography-Geology	1576	396	913	758	191	554	1180	567	25.1269035532995	25.197889182058	1.00377674451749	0.101842921584895	1.30475483027672	0.772227647258781	0
203	Physics-Maths_Low	Geography-Geology	565	137	913	160	40	554	428	120	24.2477876106195	25	1.04136253041363	0.207289777858091	1.77588902921937	0.610643965871086	0
204	Chemistry_Low	Finance-Marketing	338	55	1009	317	31	413	283	286	16.2721893491124	9.77917981072555	0.55772409408773	0.239728920030614	1.0339754935274	0.30083514268294	0
205	Finance-Marketing_Low	Chemistry	374	32	839	102	17	820	342	85	8.55614973262032	16.6666666666667	2.1375	0.323669911950902	4.91890992060012	0.928845277459884	0
206	Finance-Marketing_Low	Statistics	374	87	934	102	30	532	287	72	23.2620320855615	29.4117647058824	1.37452107279694	0.249400873401191	2.61251304024341	0.723176554704128	0
207	HighSchool_Low	Finance-Marketing	1576	347	1009	758	112	413	1229	646	22.0177664974619	14.7757255936675	0.614055905996556	0.119046516434527	0.834331458729481	0.451936279932972	1
208	Statistics_Low	Finance-Marketing	343	80	1009	170	40	413	263	130	23.3236151603499	23.5294117647059	1.01153846153846	0.221347213809275	1.7886148200275	0.572068422845712	0
209	Liberal Arts_Mid	Psychology	1287	200	694	767	208	746	1087	559	15.5400155400155	27.1186440677966	2.02232558139535	0.111877452039351	2.69751928171952	1.51613402168492	1
210	Liberal Arts_Mid	Geography-Geology	1287	260	913	767	163	554	1027	604	20.2020202020202	21.251629726206	1.06597682119205	0.112296314030557	1.42340884579038	0.798299509434166	0
211	Biological Science_Top	Medical Science	952	822	1800	981	902	2282	130	79	86.3445378151261	91.9469928644241	1.80572238134836	0.150584620737595	2.66103759859572	1.22532403158193	1
212	Biological Science_Top	Surgery	952	192	202	981	137	150	760	844	20.1680672268908	13.9653414882773	0.642525671406003	0.122508069135192	0.88083035648613	0.468693245385709	1
213	HighSchool_Mid	Surgery	1393	26	202	954	18	150	1367	936	1.8664752333094	1.88679245283019	1.01109467455621	0.309543210199903	2.24365749912022	0.455645499064275	0
214	Medical Science_Top	Biological Science	663	635	2721	694	684	2890	28	10	95.7767722473605	98.5590778097983	3.01606299212598	0.372493056536609	7.87050286234433	1.15578840787848	1
215	Medical Science_Top	Surgery	663	189	202	694	142	150	474	552	28.5067873303167	20.4610951008646	0.645157579940189	0.127493363185622	0.895865246510234	0.46461039154679	1
216	PLS_Top	Biological Science	578	562	2721	478	469	2890	16	9	97.2318339100346	98.1171548117155	1.48359035191775	0.421334388228356	4.39031559113378	0.501339889266375	0
217	PLS_Top	Medical Science	578	556	1800	478	467	2282	22	11	96.1937716262976	97.6987447698745	1.67985611510791	0.374571121601548	4.40715246827764	0.640303821521356	0
218	PLS_Top	Surgery	578	142	202	478	86	150	436	392	24.5674740484429	17.9916317991632	0.673613107214717	0.153345227795604	0.999764631488014	0.45386144290393	1
219	Surgery_Low	Biological Science	72	72	2721	47	47	2890	0	0	100	100	NA	Inf	NA	NA	NA
220	Surgery_Low	Medical Science	72	72	1800	47	47	2282	0	0	100	100	NA	Inf	NA	NA	NA
221	Biological Science_Mid	Chemistry	795	233	839	966	265	820	562	701	29.3081761006289	27.4327122153209	0.911818187384056	0.106166488843539	1.19849193311473	0.693715480156473	0
222	Biological Science_Mid	Finance-Marketing	795	123	1009	966	107	413	672	859	15.4716981132075	11.0766045548654	0.680541753031034	0.141873589104285	0.980648089152905	0.472276530940489	1
223	Biological Science_Mid	Geography-Geology	795	136	913	966	137	554	659	829	17.1069182389937	14.1821946169772	0.800778755410487	0.131817808166908	1.12441204850398	0.570295040834847	0
224	Biological Science_Mid	Medical Science	795	506	1800	966	797	2282	289	169	63.6477987421384	82.5051759834369	2.69351217344528	0.112286940937233	3.59658525705079	2.0171933403428	1
225	Chemistry_Mid	Biological Science	230	198	2721	221	212	2890	32	9	86.0869565217391	95.9276018099548	3.80695847362514	0.390036661473882	10.3934414014337	1.39443060870167	1
226	Chemistry_Mid	Computer Science	230	144	3166	221	89	1224	86	132	62.6086956521739	40.2714932126697	0.402672558922559	0.19334959025849	0.662485663562801	0.244752752591258	1
227	Chemistry_Mid	Finance-Marketing	230	29	1009	221	15	413	201	206	12.6086956521739	6.78733031674208	0.5046869768999	0.333134985550159	1.19006234698681	0.214029916413433	0
228	Chemistry_Mid	Geography-Geology	230	47	913	221	32	554	183	189	20.4347826086957	14.4796380090498	0.659236744343127	0.251559300980908	1.25997595682611	0.344921728654942	0
229	Chemistry_Mid	Medical Science	230	104	1800	221	167	2282	126	54	45.2173913043478	75.5656108597285	3.74679487179487	0.205081532621801	6.35337215616732	2.20960955320097	1
230	Chemistry_Mid	Statistics	230	58	934	221	49	532	172	172	25.2173913043478	22.1719457013575	0.844827586206897	0.221985246249374	1.49629087626242	0.477001939755862	0
231	Computer Science_Mid	Chemistry	1093	170	839	362	104	820	923	258	15.5535224153705	28.7292817679558	2.18860009119927	0.143028424333921	3.16312449815756	1.514316101686	1
232	Computer Science_Mid	Finance-Marketing	1093	362	1009	362	94	413	731	268	33.1198536139067	25.9668508287293	0.708274923723922	0.136014929883585	1.00532964643671	0.498993906480513	0
233	Computer Science_Mid	Medical Science	1093	149	1800	362	128	2282	944	234	13.6322049405306	35.3591160220994	3.46561119715482	0.140913930125363	4.98155643240547	2.41098562925349	1
234	Finance-Marketing_Mid	Biological Science	338	117	2721	133	75	2890	221	58	34.6153846153846	56.390977443609	2.44252873563218	0.208917706450446	4.18286728120323	1.42628159664507	1
235	Finance-Marketing_Mid	Chemistry	338	50	839	133	18	820	288	115	14.792899408284	13.5338345864662	0.901565217391304	0.296181413920068	1.93294403052217	0.420508730917705	0
236	Finance-Marketing_Mid	Computer Science	338	294	3166	133	90	1224	44	43	86.9822485207101	67.6691729323308	0.313241575700047	0.245958448393402	0.590115160305315	0.166273113024724	1
237	Finance-Marketing_Mid	Geography-Geology	338	52	913	133	23	554	286	110	15.3846153846154	17.2932330827068	1.15	0.274401972820436	2.3311157657755	0.567324891975083	0
238	Finance-Marketing_Mid	Medical Science	338	55	1800	133	41	2282	283	92	16.2721893491124	30.8270676691729	2.29308300395257	0.238694776244144	4.23988544374713	1.24018201264632	1
239	Finance-Marketing_Mid	Statistics	338	99	934	133	46	532	239	87	29.2899408284024	34.5864661654135	1.27644258678741	0.217987370798783	2.23757895890046	0.728155612513079	0
240	Geography-Geology_Top	Biological Science	246	120	2721	207	151	2890	126	56	48.780487804878	72.9468599033817	2.83125	0.20186505562696	4.76130042037111	1.68356874273336	1
241	Geography-Geology_Top	Chemistry	246	42	839	207	57	820	204	150	17.0731707317073	27.536231884058	1.84571428571429	0.230047844827173	3.33755849354674	1.02070457523866	1
242	Geography-Geology_Top	Finance-Marketing	246	57	1009	207	24	413	189	183	23.1707317073171	11.5942028985507	0.434857635893011	0.264510892934699	0.85931387669118	0.220060642128345	1
243	Geography-Geology_Top	Statistics	246	53	934	207	32	532	193	175	21.5447154471545	15.4589371980676	0.665876010781671	0.247009225319312	1.25784125186126	0.352501447283921	0
244	HighSchool_Top	Biological Science	1112	875	2721	1087	1011	2890	237	76	78.6870503597122	93.0082796688132	3.60311278195489	0.139675627243558	5.16271639266711	2.51464940780523	1
245	HighSchool_Top	Chemistry	1112	137	839	1087	134	820	975	953	12.3201438848921	12.327506899724	1.00068167370042	0.129757140879162	1.39766932183019	0.716452594644217	0
246	HighSchool_Top	Computer Science	1112	291	3166	1087	174	1224	821	913	26.1690647482014	16.0073597056118	0.537685888822394	0.107223456398898	0.708659346089945	0.407962043588194	1
247	HighSchool_Top	Finance-Marketing	1112	127	1009	1087	90	413	985	997	11.4208633093525	8.27966881324747	0.700131891738207	0.144925374978365	1.01683645777163	0.482068342536759	0
248	HighSchool_Top	Geography-Geology	1112	62	913	1087	50	554	1050	1037	5.57553956834532	4.59981600735971	0.816561420972408	0.195053155228868	1.34933075165954	0.494150565678885	0
249	HighSchool_Top	Medical Science	1112	854	1800	1087	981	2282	258	106	76.7985611510791	90.2483900643974	2.79592152357386	0.124500037893961	3.85260427298796	2.02906309915937	1
250	HighSchool_Top	Statistics	1112	112	934	1087	63	532	1000	1024	10.0719424460432	5.79576816927323	0.54931640625	0.163640306164427	0.837187781375191	0.360431101466571	1
251	Medical Science_Mid	Biological Science	559	538	2721	799	783	2890	21	16	96.2432915921288	97.9974968710889	1.91019981412639	0.336533687595612	4.54388374530338	0.80302743961265	0
252	Medical Science_Mid	Chemistry	559	143	839	799	194	820	416	605	25.5813953488372	24.2803504380476	0.932832456799399	0.127296444899669	1.29467367716261	0.672120247602058	0
253	Medical Science_Mid	Finance-Marketing	559	58	1009	799	74	413	501	725	10.3756708407871	9.26157697121402	0.88166468489893	0.184743636298298	1.41874317598282	0.547902276999105	0
254	Medical Science_Mid	Statistics	559	45	934	799	63	532	514	736	8.05008944543828	7.88485607008761	0.977717391304348	0.203468570150873	1.65102606379649	0.57899225107376	0
255	Statistics_Mid	Biological Science	310	126	2721	161	110	2890	184	51	40.6451612903226	68.3229813664596	3.14970432617491	0.205109831001265	5.341285736168	1.85735005246927	1
256	Statistics_Mid	Chemistry	310	55	839	161	54	820	255	107	17.741935483871	33.5403726708075	2.33984706881903	0.223534560460594	4.16071554384708	1.3158516240211	1
257	Statistics_Mid	Computer Science	310	272	3166	161	124	1224	38	37	87.741935483871	77.0186335403727	0.468203497615262	0.255115274372153	0.903092384754135	0.242737641109492	1
258	Statistics_Mid	Finance-Marketing	310	108	1009	161	34	413	202	127	34.8387096774194	21.1180124223602	0.500729075532225	0.226926276051668	0.898206815204673	0.279144627761729	1
259	Statistics_Mid	Geography-Geology	310	70	913	161	29	554	240	132	22.5806451612903	18.0124223602484	0.753246753246753	0.245989628132627	1.41915394566514	0.399802060241498	0
260	Statistics_Mid	Medical Science	310	68	1800	161	72	2282	242	89	21.9354838709677	44.7204968944099	2.87904824851289	0.209673454931635	4.94001771246906	1.67791277273017	1
261	Biological Science_Low	Food Science	974	84	297	943	157	341	890	786	8.62422997946612	16.6489925768823	2.11635162971041	0.143770820380964	3.06455857951719	1.46152997384816	1
262	Biological Science_Low	Medical Science	974	390	1800	943	536	2282	584	407	40.041067761807	56.8398727465536	1.97205317205317	0.0927313616314316	2.50392243303018	1.55316061795837	1
263	Biological Science_Low	Optometry	974	19	213	943	33	337	955	910	1.95071868583162	3.49946977730647	1.82272990167727	0.291685842591217	3.86293156469528	0.86005776670561	0
264	Biological Science_Low	Pharmacy	974	60	272	943	89	375	914	854	6.16016427104723	9.43796394485684	1.58754879000781	0.173688438918427	2.48292900922551	1.01505566663036	1
265	Chemistry_Mid	Food Science	230	36	297	221	68	341	194	153	15.6521739130435	30.7692307692308	2.39506172839506	0.232753618700967	4.36121013411385	1.31530481366918	1
266	Chemistry_Mid	Liberal Arts	230	195	3933	221	184	2408	35	37	84.7826086956522	83.2579185520362	0.892584892584893	0.257218668325914	1.73100890192508	0.460256321954643	0
267	Chemistry_Mid	Optometry	230	20	213	221	31	337	210	190	8.69565217391304	14.027149321267	1.71315789473684	0.30378138055643	3.74557612811788	0.78356703265672	0
268	Chemistry_Mid	Pharmacy	230	56	272	221	70	375	174	151	24.3478260869565	31.6742081447964	1.44039735099338	0.210979857180562	2.47983529819597	0.836646099141372	0
269	Computer Science_Top	Chemistry	947	161	839	517	127	820	786	390	17.0010559662091	24.5647969052224	1.58977544194936	0.133871442314636	2.24411613242709	1.12622779155899	1
270	Computer Science_Top	Finance-Marketing	947	231	1009	517	103	413	716	414	24.3928194297782	19.9226305609284	0.771148336365728	0.133603327709203	1.08779644473563	0.546673745402938	0
271	Computer Science_Top	Food Science	947	66	297	517	55	341	881	462	6.96937697993664	10.6382978723404	1.58910533910534	0.191397255146544	2.60132026418967	0.97075927694729	0
272	Computer Science_Top	Optometry	947	43	213	517	53	337	904	464	4.54065469904963	10.2514506769826	2.40136327185245	0.213037803184902	4.15623222709661	1.38744546702824	1
273	Computer Science_Top	Pharmacy	947	61	272	517	69	375	886	448	6.44139387539599	13.3462282398453	2.2370462529274	0.185059469562732	3.60270334469588	1.38906134059144	1
274	Finance-Marketing_Top	Biological Science	297	111	2721	178	125	2890	186	53	37.3737373737374	70.2247191011236	3.95206527281999	0.203109028906478	6.66749378930128	2.34253235386463	1
275	Finance-Marketing_Top	Chemistry	297	38	839	178	31	820	259	147	12.7946127946128	17.4157303370787	1.43734335839599	0.263130345911019	2.8302276791073	0.729961036412697	0
276	Finance-Marketing_Top	Computer Science	297	218	3166	178	84	1224	79	94	73.4006734006734	47.1910112359551	0.323833691196565	0.199470407801524	0.541241938685566	0.193754866462621	1
277	Finance-Marketing_Top	Food Science	297	25	297	178	17	341	272	161	8.41750841750842	9.55056179775281	1.1488198757764	0.329713785159528	2.68518121495127	0.49150764932744	0
278	Finance-Marketing_Top	Liberal Arts	297	221	3933	178	123	2408	76	55	74.4107744107744	69.1011235955056	0.769066227889757	0.209749090814004	1.31986006254446	0.448125433646612	0
279	Finance-Marketing_Top	Medical Science	297	86	1800	178	110	2282	211	68	28.956228956229	61.7977528089888	3.96887824897401	0.200409667714623	6.64947824508548	2.3689068487172	1
280	Finance-Marketing_Top	Optometry	297	8	213	178	15	337	289	163	2.69360269360269	8.42696629213483	3.32438650306748	0.448622161294197	10.5538129539295	1.047161406974	1
281	Finance-Marketing_Top	Pharmacy	297	21	272	178	20	375	276	158	7.07070707070707	11.2359550561798	1.66365280289331	0.327980715818621	3.87120571101806	0.714955715398263	0
282	Finance-Marketing_Top	Statistics	297	96	934	178	48	532	201	130	32.3232323232323	26.9662921348315	0.773076923076923	0.209564863635146	1.32611392041347	0.450676159713142	0
283	Food Science_Low	Biological Science	126	78	2721	110	103	2890	48	7	61.9047619047619	93.6363636363636	9.05494505494505	0.431531837614638	27.5087876696472	2.98057591387579	1
284	Food Science_Low	Chemistry	126	40	839	110	71	820	86	39	31.7460317460317	64.5454545454545	3.91410256410256	0.276321261686507	7.97341850078614	1.92140910210643	1
285	Food Science_Low	Computer Science	126	88	3166	110	53	1224	38	57	69.8412698412698	48.1818181818182	0.401515151515152	0.272197005888649	0.809286147823721	0.199205704100784	1
286	Food Science_Low	Finance-Marketing	126	37	1009	110	13	413	89	97	29.3650793650794	11.8181818181818	0.322373920312065	0.354253210792505	0.802646291278748	0.129477885373145	1
287	Food Science_Low	Liberal Arts	126	110	3933	110	99	2408	16	11	87.3015873015873	90	1.30909090909091	0.415452777221443	3.81569885905012	0.449123233139807	0
288	Food Science_Low	Medical Science	126	53	1800	110	73	2282	73	37	42.0634920634921	66.3636363636364	2.71749107598164	0.270725343899129	5.45660508266908	1.3533612266526	1
289	Food Science_Low	Optometry	126	7	213	110	4	337	119	106	5.55555555555556	3.63636363636364	0.641509433962264	0.640854481505616	3.34099578221194	0.123177154563818	0
290	Food Science_Low	Pharmacy	126	9	272	110	12	375	117	98	7.14285714285714	10.9090909090909	1.59183673469388	0.461731019776781	5.22704393193513	0.484775759093871	0
291	Food Science_Low	Statistics	126	26	934	110	31	532	100	79	20.6349206349206	28.1818181818182	1.50925024342746	0.305577863769234	3.31506091551683	0.687117478482509	0
292	Liberal Arts_Mid	Chemistry	1287	263	839	767	242	820	1024	525	20.4351204351204	31.5514993481095	1.79473474560927	0.103999217201582	2.3458673868305	1.37308392843517	1
293	Liberal Arts_Mid	Finance-Marketing	1287	338	1009	767	121	413	949	646	26.2626262626263	15.7757496740548	0.525899023577042	0.117578786723802	0.71185525680189	0.388519689019106	1
294	Liberal Arts_Mid	Food Science	1287	96	297	767	119	341	1191	648	7.45920745920746	15.5149934810952	2.27830825617284	0.145612047751208	3.31475660164076	1.56593353116063	1
295	Liberal Arts_Mid	Medical Science	1287	312	1800	767	434	2282	975	333	24.2424242424242	56.5840938722295	4.07282282282282	0.0976622736741779	5.23735543008383	3.16722551439305	1
296	Liberal Arts_Mid	Optometry	1287	42	213	767	44	337	1245	723	3.26340326340326	5.73663624511082	1.80399130606599	0.220733176601651	3.18480012554551	1.0218489399878	1
297	Liberal Arts_Mid	Pharmacy	1287	71	272	767	100	375	1216	667	5.51670551670552	13.0378096479791	2.56773021939734	0.162499617962993	3.90188137948539	1.6897588210321	1
298	Medical Science_Low	Biological Science	578	545	2721	789	768	2890	33	21	94.2906574394464	97.3384030418251	2.21441677588467	0.284708664498874	4.60947456510534	1.0638179228585	1
299	Medical Science_Low	Chemistry	578	170	839	789	297	820	408	492	29.4117647058824	37.6425855513308	1.44878048780488	0.117187273308751	1.95908864572107	1.07139863549747	1
300	Medical Science_Low	Computer Science	578	273	3166	789	269	1224	305	520	47.2318339100346	34.0937896070976	0.57794449140603	0.112170589860399	0.771484898435146	0.432957062185001	1
301	Medical Science_Low	Finance-Marketing	578	87	1009	789	76	413	491	713	15.0519031141869	9.63244613434727	0.60157018265061	0.167604689768471	0.926232501022024	0.39070825549198	1
302	Medical Science_Low	Food Science	578	75	297	789	154	341	503	635	12.9757785467128	19.5183776932826	1.62649868766404	0.152936962657896	2.41148403206823	1.09704146732579	1
303	Medical Science_Low	Liberal Arts	578	446	3933	789	623	2408	132	166	77.1626297577855	78.9607097591889	1.11075692906154	0.132087633275279	1.56075137614719	0.790504480286847	0
304	Medical Science_Low	Optometry	578	51	213	789	58	337	527	731	8.82352941176471	7.3510773130545	0.819881440948472	0.200286656346643	1.37319838526178	0.4895181820969	0
305	Medical Science_Low	Pharmacy	578	91	272	789	127	375	487	662	15.7439446366782	16.0963244613435	1.02667574117725	0.149756431733393	1.50975737453522	0.698167199114597	0
306	Medical Science_Low	Statistics	578	109	934	789	142	532	469	647	18.8581314878893	17.9974651457541	0.944344398281412	0.14104735610381	1.35789076979058	0.656743798842539	0
307	Optometry_Low	Biological Science	81	79	2721	107	107	2890	2	0	97.5308641975309	100	Inf	Inf	Inf	NA	NA
308	Optometry_Low	Chemistry	81	35	839	107	50	820	46	57	43.2098765432099	46.7289719626168	1.15288220551378	0.296402460609446	2.47317168192399	0.537422205463849	0
309	Optometry_Low	Computer Science	81	31	3166	107	25	1224	50	82	38.2716049382716	23.3644859813084	0.491738788355626	0.323192181940326	1.13021993558112	0.213946886230713	0
310	Optometry_Low	Finance-Marketing	81	12	1009	107	10	413	69	97	14.8148148148148	9.34579439252336	0.592783505154639	0.456218549937458	1.91906240375383	0.183106231092887	0
311	Optometry_Low	Food Science	81	7	297	107	17	341	74	90	8.64197530864197	15.8878504672897	1.9968253968254	0.475715563013795	6.79730488131639	0.58660185691637	0
312	Optometry_Low	Liberal Arts	81	56	3933	107	73	2408	25	34	69.1358024691358	68.2242990654206	0.958508403361344	0.317753894862064	2.17241473491028	0.42291112491108	0
313	Optometry_Low	Medical Science	81	80	1800	107	107	2282	1	0	98.7654320987654	100	Inf	Inf	Inf	NA	NA
314	Optometry_Low	Pharmacy	81	43	272	107	51	375	38	56	53.0864197530864	47.6635514018692	0.804817275747508	0.295019642433466	1.72036343046648	0.376508146982646	0
315	Optometry_Low	Statistics	81	12	934	107	14	532	69	93	14.8148148148148	13.0841121495327	0.865591397849462	0.424272726624204	2.58095623072036	0.290298788918968	0
316	Pharmacy_Low	Biological Science	137	131	2721	149	143	2890	6	6	95.6204379562044	95.9731543624161	1.09160305343511	0.589881283066856	4.98578872698704	0.238998740524041	0
317	Pharmacy_Low	Chemistry	137	75	839	149	74	820	62	75	54.7445255474453	49.6644295302013	0.815644444444444	0.237295622459085	1.50269397262114	0.442722118990502	0
318	Pharmacy_Low	Computer Science	137	65	3166	149	72	1224	72	77	47.4452554744526	48.3221476510067	1.03576423576424	0.236958659156837	1.90657434216855	0.562688550013766	0
319	Pharmacy_Low	Finance-Marketing	137	22	1009	149	16	413	115	133	16.0583941605839	10.738255033557	0.628844839371155	0.352376211769381	1.55814812124052	0.253792195114865	0
320	Pharmacy_Low	Food Science	137	13	297	149	19	341	124	130	9.48905109489051	12.751677852349	1.39408284023669	0.381197428758098	3.72035880245417	0.522386970891184	0
321	Pharmacy_Low	Liberal Arts	137	108	3933	149	130	2408	29	19	78.8321167883212	87.248322147651	1.83723196881092	0.322592474369172	4.21620610172255	0.800582615219353	0
322	Pharmacy_Low	Medical Science	137	125	1800	149	133	2282	12	16	91.2408759124088	89.261744966443	0.798	0.401686607102869	2.24497936980949	0.283656949620004	0
323	Pharmacy_Low	Optometry	137	40	213	149	34	337	97	115	29.1970802919708	22.8187919463087	0.71695652173913	0.270955153540786	1.44046998816848	0.356846486415064	0
324	Pharmacy_Low	Statistics	137	28	934	149	41	532	109	108	20.4379562043796	27.5167785234899	1.47784391534392	0.280246500071971	3.04109895764803	0.718168881886087	0
325	PLS_Low	Chemistry	734	172	839	976	310	820	562	666	23.433242506812	31.7622950819672	1.52088134646274	0.110998292203491	2.02407053968923	1.14278629359107	1
326	PLS_Low	Finance-Marketing	734	121	1009	976	100	413	613	876	16.4850136239782	10.2459016393443	0.578323710328692	0.145042534077569	0.840181793809158	0.398078506809819	1
327	PLS_Low	Food Science	734	83	297	976	164	341	651	812	11.3079019073569	16.8032786885246	1.58412962193602	0.144614588304853	2.29886997494631	1.09160878450891	1
328	PLS_Low	Medical Science	734	441	1800	976	796	2282	293	180	60.0817438692098	81.5573770491803	2.93812043335853	0.111769315744583	3.91797937979401	2.20331728273995	1
329	PLS_Low	Optometry	734	50	213	976	97	337	684	879	6.81198910081744	9.93852459016393	1.50962457337884	0.181408167077361	2.4084587575572	0.946234327408911	0
330	PLS_Low	Pharmacy	734	72	272	976	134	375	662	842	9.80926430517711	13.7295081967213	1.46324887833201	0.155079972692276	2.18145078314605	0.981501529386808	0
331	Statistics_Top	Chemistry	281	49	839	201	54	820	232	147	17.4377224199288	26.865671641791	1.73927530195752	0.22369565865221	3.09406219689317	0.977704513838466	0
332	Statistics_Top	Finance-Marketing	281	94	1009	201	50	413	187	151	33.4519572953737	24.8756218905473	0.658729040439622	0.206418041875025	1.12084566790992	0.387139783060104	0
333	Statistics_Top	Food Science	281	11	297	201	17	341	270	184	3.91459074733096	8.45771144278607	2.26778656126482	0.398586385408803	6.32913904511145	0.812568005031522	0
334	Statistics_Top	Medical Science	281	61	1800	201	104	2282	220	97	21.7081850533808	51.7412935323383	3.86682440425891	0.202147372316104	6.50755029434794	2.29768965233492	1
335	Statistics_Top	Optometry	281	6	213	201	11	337	275	190	2.13523131672598	5.4726368159204	2.65350877192982	0.516212436024994	10.0254799949381	0.702321365786335	0
336	Statistics_Top	Pharmacy	281	20	272	201	34	375	261	167	7.11743772241993	16.9154228855721	2.65688622754491	0.298715929073927	5.73362727844607	1.2311655577359	1
337	Biological Science_Top	Chemistry	952	134	839	981	130	820	818	851	14.0756302521008	13.2517838939857	0.932528894890997	0.132486136175119	1.31166412988443	0.662982329083928	0
338	Biological Science_Top	Pharmacy	952	88	272	981	109	375	864	872	9.2436974789916	11.1111111111111	1.22727272727273	0.151136179283701	1.81116461905133	0.831618689579069	0
339	Biological Science_Top	Population Health	952	16	87	981	18	115	936	963	1.68067226890756	1.8348623853211	1.09345794392523	0.346644418998923	2.66966895880245	0.447864620514425	0
340	Biological Science_Top	Statistics	952	49	934	981	51	532	903	930	5.14705882352941	5.19877675840979	1.01059907834101	0.205423209330972	1.71516290751382	0.595459762259042	0
341	Chemistry_Top	Biological Science	271	233	2721	282	265	2890	38	17	85.9778597785978	93.9716312056738	2.54228730118657	0.305294528749979	5.58004923383316	1.1582737805585	1
342	Chemistry_Top	Medical Science	271	170	1800	282	219	2282	101	63	62.7306273062731	77.6595744680851	2.06526610644258	0.190322276570202	3.37143660355649	1.26513548732343	1
343	Chemistry_Top	Pharmacy	271	77	272	282	98	375	194	184	28.4132841328413	34.7517730496454	1.34189723320158	0.183794767073547	2.15406333876578	0.835949506250733	0
344	Chemistry_Top	Population Health	271	6	87	282	7	115	265	275	2.2140221402214	2.4822695035461	1.12424242424242	0.562968700787027	4.79107021152961	0.263807661475068	0
345	Chemistry_Top	Statistics	271	37	934	282	35	532	234	247	13.6531365313653	12.4113475177305	0.896159317211949	0.252825123094821	1.71838967968432	0.467357044400616	0
346	Medical Science_Mid	Pharmacy	559	115	272	799	166	375	444	633	20.5724508050089	20.7759699624531	1.01248712136823	0.136204917835852	1.43783349558172	0.712968625426107	0
347	Medical Science_Mid	Population Health	559	34	87	799	47	115	525	752	6.08228980322004	5.88235294117647	0.965073529411765	0.232213069376742	1.75487507031927	0.53073118019839	0
348	Pharmacy_Low	Population Health	137	36	87	149	25	115	101	124	26.2773722627737	16.7785234899329	0.565636200716846	0.292819541707551	1.2022636532729	0.266118260075823	0
349	PLS_Mid	Biological Science	649	590	2721	833	817	2890	59	16	90.9090909090909	98.0792316926771	5.10625	0.286998358888494	10.6918958121786	2.43864975122565	1
350	PLS_Mid	Chemistry	649	138	839	833	192	820	511	641	21.2634822804314	23.0492196878752	1.10913653937462	0.126379269304148	1.53573399380566	0.801039677403651	0
351	PLS_Mid	Pharmacy	649	94	272	833	137	375	555	696	14.4838212634823	16.4465786314526	1.16218818782098	0.145520278161947	1.69049149692699	0.798987387020824	0
352	PLS_Mid	Population Health	649	17	87	833	30	115	632	803	2.61941448382126	3.60144057623049	1.3889092374185	0.308195508141446	3.07136519374347	0.628081894564692	0
353	PLS_Mid	Statistics	649	49	934	833	60	532	600	773	7.55007704160247	7.20288115246098	0.950444860997439	0.200087874843633	1.59106109415206	0.567762882969539	0
354	Population Health_Mid	Biological Science	24	24	2721	23	23	2890	0	0	100	100	NA	Inf	NA	NA	NA
355	Population Health_Mid	Chemistry	24	7	839	23	6	820	17	17	29.1666666666667	26.0869565217391	0.857142857142857	0.653583099802419	4.61275735145678	0.159274338876506	0
356	Population Health_Mid	Medical Science	24	24	1800	23	23	2282	0	0	100	100	NA	Inf	NA	NA	NA
357	Population Health_Mid	Pharmacy	24	23	272	23	15	375	1	8	95.8333333333333	65.2173913043478	0.0815217391304348	1.11137074261303	1.4260296379065	0.00466034770540052	0
358	Population Health_Mid	Statistics	24	3	934	23	2	532	21	21	12.5	8.69565217391304	0.666666666666667	0.963624111659432	7.97145455101761	0.0557544977017661	0
359	Statistics_Mid	Pharmacy	310	23	272	161	17	375	287	144	7.41935483870968	10.5590062111801	1.47312801932367	0.335753712240484	3.49716924227991	0.620532210760759	0
360	Statistics_Mid	Population Health	310	4	87	161	3	115	306	158	1.29032258064516	1.86335403726708	1.45253164556962	0.770019753716483	10.5498206765434	0.199989008919579	0
361	Food Science_Top	Geography-Geology	80	11	913	101	14	554	69	87	13.75	13.8613861386139	1.00940438871473	0.433963902685942	3.0858202094304	0.33018683876746	0
362	Food Science_Top	Liberal Arts	80	57	3933	101	90	2408	23	11	71.25	89.1089108910891	3.30143540669856	0.403784995435554	9.33810843651391	1.16720380992619	1
363	Food Science_Top	Physics-Maths	80	25	1600	101	8	551	55	93	31.25	7.92079207920792	0.189247311827957	0.440379956803056	0.588180031255395	0.0608904470246404	1
364	Geography-Geology_Top	Food Science	246	10	297	207	18	341	236	189	4.0650406504065	8.69565217391304	2.24761904761905	0.406305118085109	6.39877863541469	0.789493069077324	0
365	Geography-Geology_Top	Physics-Maths	246	98	1600	207	60	551	148	147	39.8373983739837	28.9855072463768	0.616409829237818	0.201072688708616	1.03450075079706	0.367289320271874	0
366	HighSchool_Mid	Food Science	1393	111	297	954	99	341	1282	855	7.96841349605169	10.377358490566	1.33731626363205	0.145119402405543	1.94322172481482	0.920334908845887	0
367	Physics-Maths_Top	Food Science	481	34	297	211	11	341	447	200	7.06860706860707	5.21327014218009	0.723088235294118	0.357152617350479	1.81383604762695	0.28826011959836	0
368	Physics-Maths_Top	Geography-Geology	481	80	913	211	39	554	401	172	16.6320166320166	18.4834123222749	1.13655523255814	0.215519708415339	1.97973938264901	0.652488811394377	0
369	Physics-Maths_Top	Liberal Arts	481	312	3933	211	141	2408	169	70	64.8648648648649	66.824644549763	1.09107142857143	0.174643066955767	1.71063743977984	0.695902494919149	0
370	Finance-Marketing_Mid	Liberal Arts	338	297	3933	133	117	2408	41	16	87.8698224852071	87.9699248120301	1.0094696969697	0.314331442615038	2.26784174295716	0.449338703754225	0
371	AP1_Mid	Biological Science	422	135	2721	93	57	2890	287	36	31.9905213270142	61.2903225806452	3.36604938271605	0.237093579398092	6.19818020503289	1.82800242524136	1
372	AP1_Mid	Computer Science	422	373	3166	93	75	1224	49	18	88.3886255924171	80.6451612903226	0.547363717605004	0.303278778192026	1.19518512290634	0.250678354012486	0
373	AP1_Mid	Liberal Arts	422	388	3933	93	88	2408	34	5	91.9431279620853	94.6236559139785	1.54226804123711	0.493307936949273	5.49326076066178	0.433001602264155	0
374	AP1_Mid	Medical Science	422	14	1800	93	6	2282	408	87	3.3175355450237	6.45161290322581	2.00985221674877	0.502036324742501	7.32142317269048	0.551737802595216	0
375	HighSchool_Low	Medical Science	1576	182	1800	758	273	2282	1394	485	11.5482233502538	36.0158311345646	4.31134020618557	0.109255319972942	5.71206872939199	3.25410201698514	1
376	Liberal Arts_Low	Medical Science	1620	178	1800	764	221	2282	1442	543	10.9876543209877	28.9267015706806	3.29714238417448	0.112596475557961	4.40610938170981	2.46728961079517	1
377	Food Science_Low	Geography-Geology	126	17	913	110	23	554	109	87	13.4920634920635	20.9090909090909	1.69506423258959	0.350671292069223	4.18162201245684	0.687112021135646	0
378	Geography-Geology_Mid	Biological Science	343	176	2721	181	139	2890	167	42	51.3119533527697	76.7955801104972	3.1402867965368	0.206575919573784	5.34545744815587	1.84481894396249	1
379	Geography-Geology_Mid	Food Science	343	20	297	181	22	341	323	159	5.83090379008746	12.1546961325967	2.23459119496855	0.323789791165262	5.14392811887371	0.970736311479469	0
380	Geography-Geology_Mid	Liberal Arts	343	310	3933	181	169	2408	33	12	90.3790087463557	93.3701657458564	1.4991935483871	0.350398815425067	3.69582675429137	0.608140328254224	0
381	HighSchool_Low	Food Science	1576	77	297	758	84	341	1499	674	4.88578680203046	11.0817941952507	2.42622066360939	0.16444623992236	3.70537264256299	1.58865174339213	1
382	Liberal Arts_Low	Food Science	1620	64	297	764	56	341	1556	708	3.95061728395062	7.32984293193717	1.92302259887006	0.188513250880475	3.12464238374184	1.18350052953467	1
383	Biological Science_Low	Physics-Maths	974	262	1600	943	132	551	712	811	26.8993839835729	13.9978791092259	0.442315113750812	0.118448687091068	0.60005896438554	0.326039058599402	1
384	Finance-Marketing_Low	Physics-Maths	374	105	1600	102	18	551	269	84	28.0748663101604	17.6470588235294	0.548979591836735	0.284080268767625	1.14089458753032	0.264159893076203	0
385	Physics-Maths_Low	Finance-Marketing	565	109	1009	160	23	413	456	137	19.2920353982301	14.375	0.702337105738967	0.249288638580469	1.33452638581941	0.369627318979471	0
386	Liberal Arts_Top	Statistics	1026	204	934	877	152	532	822	725	19.8830409356725	17.3318129988597	0.844787018255578	0.11864553725163	1.1466464200481	0.622393349628403	0
387	Statistics_Mid	Liberal Arts	310	272	3933	161	155	2408	38	6	87.741935483871	96.2732919254658	3.60906862745098	0.450677866809334	11.5183941420049	1.13083266617439	1
388	Geography-Geology_Mid	Psychology	343	44	694	181	51	746	299	130	12.8279883381924	28.1767955801105	2.66590909090909	0.231023603041305	4.83282363114557	1.47058362220992	1
389	Psychology_Mid	Geography-Geology	233	44	913	248	48	554	189	200	18.8841201716738	19.3548387096774	1.03090909090909	0.232059499593555	1.87384831172081	0.567160931368576	0
390	Biological Science_Low	Population Health	974	38	87	943	42	115	936	901	3.90143737166324	4.45387062566278	1.14819790875635	0.228699731667997	2.0690622524042	0.637176786798251	0
391	Computer Science_Mid	Population Health	1093	4	87	362	8	115	1089	354	0.365965233302836	2.20994475138122	6.15254237288136	0.615421101687786	30.0113225024043	1.26131654634906	1
392	Geography-Geology_Mid	Population Health	343	4	87	181	10	115	339	171	1.16618075801749	5.52486187845304	4.95614035087719	0.598997333653288	23.1743350135124	1.0599366567917	1
393	Liberal Arts_Low	Population Health	1620	26	87	764	17	115	1594	747	1.60493827160494	2.22513089005236	1.3952219132942	0.315041439387146	3.14019590051772	0.619911702647404	0
394	Physics-Maths_Low	Population Health	565	4	87	160	1	115	561	159	0.707964601769911	0.625	0.882075471698113	1.12163801619346	15.8431975870137	0.0491098550970042	0
395	PLS_Low	Population Health	734	26	87	976	47	115	708	929	3.54223433242507	4.8155737704918	1.37766001490436	0.249453382116882	2.61883320642334	0.724730048485374	0
396	Population Health_Low	Biological Science	45	44	2721	47	46	2890	1	1	97.7777777777778	97.8723404255319	1.04545454545455	1.42984838467652	41.5256518485175	0.026320482833085	0
397	Population Health_Low	Computer Science	45	24	3166	47	13	1224	21	34	53.3333333333333	27.6595744680851	0.334558823529412	0.442290126404234	1.04493482569073	0.107116351804426	0
398	Population Health_Low	Geography-Geology	45	11	913	47	14	554	34	33	24.4444444444444	29.7872340425532	1.31129476584022	0.471224423546334	4.41239625601528	0.389696179389107	0
399	Population Health_Low	Liberal Arts	45	39	3933	47	41	2408	6	6	86.6666666666667	87.2340425531915	1.05128205128205	0.619164439286364	5.1776891761005	0.213453128173321	0
400	Population Health_Low	Physics-Maths	45	8	1600	47	3	551	37	44	17.7777777777778	6.38297872340426	0.315340909090909	0.712802660690624	1.97657564850254	0.0503091743650779	0
401	AP1_Top	Computer Science	438	331	3166	130	83	1224	107	47	75.5707762557078	63.8461538461538	0.570868419361059	0.2137562418844	0.98987737023405	0.32922335839109	1
402	AP1_Top	Liberal Arts	438	348	3933	130	104	2408	90	26	79.4520547945205	80	1.03448275862069	0.249121651821806	1.96479871530837	0.544663720281147	0
403	AP1_Top	Physics-Maths	438	312	1600	130	95	551	126	35	71.2328767123288	73.0769230769231	1.09615384615385	0.224141429687906	1.95222887118362	0.615477658472173	0
404	Geography-Geology_Low	Statistics	324	80	934	166	50	532	244	116	24.6913580246914	30.1204819277108	1.31465517241379	0.212647714097542	2.27309484033929	0.760337048715646	0
405	Statistics_Mid	Physics-Maths	310	159	1600	161	66	551	151	95	51.2903225806452	40.9937888198758	0.659781529294935	0.196442499661812	1.0941665387838	0.397847723329784	0
406	Finance-Marketing_Top	Physics-Maths	297	97	1600	178	37	551	200	141	32.6599326599327	20.7865168539326	0.541054324778826	0.22232522114934	0.959111306914283	0.305219821986765	1
407	HighSchool_Top	Physics-Maths	1112	233	1600	1087	99	551	879	988	20.9532374100719	9.10763569457222	0.378016889367691	0.128618263754877	0.526436599045926	0.271441554227424	1
408	Physics-Maths_Top	Finance-Marketing	481	89	1009	211	38	413	392	173	18.5031185031185	18.0094786729858	0.96746119373904	0.214203435450593	1.67949622365185	0.557298759121826	0
409	Psychology_Low	Chemistry	318	63	839	242	55	820	255	187	19.811320754717	22.7272727272727	1.19047619047619	0.208144171826099	2.03465165959636	0.696548499300297	0
410	AP1_Low	Finance-Marketing	473	92	1009	152	32	413	381	120	19.4503171247357	21.0526315789474	1.10434782608696	0.23038569935379	1.99870232791321	0.610187972441258	0
411	HighSchool_Mid	Finance-Marketing	1393	323	1009	954	125	413	1070	829	23.1873653984207	13.1027253668763	0.499501432215322	0.115051411503997	0.671737641599526	0.371427273587125	1
412	Physics-Maths_Mid	Finance-Marketing	554	119	1009	180	26	413	435	154	21.4801444043321	14.4444444444444	0.617155953290407	0.235917902827012	1.13298424157367	0.336175435373013	0
413	Chemistry_Low	Food Science	338	27	297	317	54	341	311	263	7.98816568047337	17.0347003154574	2.36501901140684	0.250146499091988	4.50376311783555	1.24192031818136	1
414	Statistics_Mid	Food Science	310	19	297	161	24	341	291	137	6.12903225806452	14.9068322981366	2.68305800998847	0.324089404028991	6.18104535153795	1.1646574123861	1
415	Chemistry_Low	Medical Science	338	87	1800	317	165	2282	251	152	25.7396449704142	52.0504731861199	3.1318058076225	0.167683839554115	4.82299768156765	2.03363307723383	1
416	Chemistry_Low	Pharmacy	338	22	272	317	33	375	316	284	6.50887573964497	10.410094637224	1.66901408450704	0.287129342771101	3.49590100648467	0.79682119405434	0
417	Chemistry_Low	Population Health	338	12	87	317	7	115	326	310	3.55029585798817	2.20820189274448	0.613440860215054	0.482165705234897	2.12315942505666	0.177240429776649	0
418	Computer Science_Low	Medical Science	1126	86	1800	345	68	2282	1040	277	7.63765541740675	19.7101449275362	2.96868440936949	0.17579942006296	4.66833464741724	1.88784390752906	1
419	Computer Science_Low	Pharmacy	1126	16	272	345	20	375	1110	325	1.42095914742451	5.79710144927536	4.26923076923077	0.341288476186677	10.2805266521797	1.77289860506148	1
420	Computer Science_Low	Population Health	1126	12	87	345	6	115	1114	339	1.06571936056838	1.73913043478261	1.64306784660767	0.503832828005081	6.01306537731415	0.448967669425511	0
421	HighSchool_Low	Pharmacy	1576	44	272	758	58	375	1532	700	2.79187817258883	7.65171503957784	2.88493506493506	0.205060881156181	4.89167196833812	1.7014326354593	1
422	HighSchool_Low	Population Health	1576	20	87	758	19	115	1556	739	1.26903553299492	2.5065963060686	2.00027063599459	0.323461639830994	4.60064362399596	0.869678885005004	0
423	Liberal Arts_Low	Pharmacy	1620	29	272	764	39	375	1591	725	1.79012345679012	5.10471204188482	2.95120095124851	0.249262171455677	5.60726052960591	1.55326955269229	1
424	Medical Science_Top	Chemistry	663	48	839	694	60	820	615	634	7.23981900452489	8.64553314121038	1.21253943217666	0.201750596842757	2.03852121738192	0.721234521400536	0
425	Medical Science_Top	Computer Science	663	56	3166	694	55	1224	607	639	8.44645550527903	7.92507204610951	0.932958864296892	0.198119541499238	1.55389339707224	0.560149263849198	0
426	Medical Science_Top	Liberal Arts	663	133	3933	694	195	2408	530	499	20.0603318250377	28.0979827089337	1.55724983802191	0.128599387982792	2.16856306284654	1.11826448562491	1
427	Medical Science_Top	Pharmacy	663	41	272	694	62	375	622	632	6.18401206636501	8.93371757925072	1.48826798394566	0.209067624665602	2.54966543970467	0.868718521867813	0
428	Medical Science_Top	Population Health	663	12	87	694	11	115	651	683	1.80995475113122	1.5850144092219	0.873718887262079	0.421001961273406	2.58334082818843	0.295502895176944	0
429	Medical Science_Top	Statistics	663	31	934	694	22	532	632	672	4.67571644042232	3.1700288184438	0.667434715821813	0.284223474909766	1.38758073230324	0.321040130864825	0
430	Pharmacy_Mid	Biological Science	62	59	2721	90	88	2890	3	2	95.1612903225807	97.7777777777778	2.23728813559322	0.928248954881902	24.4225170702732	0.204952593021576	0
431	Pharmacy_Mid	Chemistry	62	41	839	90	62	820	21	28	66.1290322580645	68.8888888888889	1.13414634146341	0.351926994551195	2.80693251906753	0.458253953423204	0
432	Pharmacy_Mid	Computer Science	62	19	3166	90	19	1224	43	71	30.6451612903226	21.1111111111111	0.605633802816901	0.377628758028939	1.60145772177433	0.22903651974532	0
433	Pharmacy_Mid	Liberal Arts	62	41	3933	90	49	2408	21	41	66.1290322580645	54.4444444444444	0.612135633551458	0.341771412919852	1.47588821865824	0.253887814216785	0
434	Pharmacy_Mid	Medical Science	62	58	1800	90	89	2282	4	1	93.5483870967742	98.8888888888889	6.13793103448276	1.13069772015624	112.847161456949	0.3338515288968	0
435	Pharmacy_Mid	Population Health	62	10	87	90	11	115	52	79	16.1290322580645	12.2222222222222	0.724050632911392	0.472014923480139	2.44133366471002	0.214738905458734	0
436	Pharmacy_Mid	Statistics	62	14	934	90	6	532	48	84	22.5806451612903	6.66666666666667	0.244897959183673	0.520416499866533	0.935343758449843	0.0641208217519146	1
437	Population Health_Top	Biological Science	18	18	2721	45	45	2890	0	0	100	100	NA	Inf	NA	NA	NA
438	Population Health_Top	Chemistry	18	3	839	45	4	820	15	41	16.6666666666667	8.88888888888889	0.48780487804878	0.82121266667194	4.04217463655756	0.0588677186027852	0
439	Population Health_Top	Computer Science	18	4	3166	45	7	1224	14	38	22.2222222222222	15.5555555555556	0.644736842105263	0.700429513769514	3.91452093642636	0.10619066862045	0
440	Population Health_Top	Liberal Arts	18	14	3933	45	42	2408	4	3	77.7777777777778	93.3333333333333	4	0.823754471047914	33.3634878561514	0.479566167331933	0
441	Population Health_Top	Medical Science	18	18	1800	45	45	2282	0	0	100	100	NA	Inf	NA	NA	NA
442	Population Health_Top	Pharmacy	18	13	272	45	30	375	5	15	72.2222222222222	66.6666666666667	0.769230769230769	0.61394061351492	3.73793311394804	0.158300311507282	0
443	Population Health_Top	Statistics	18	6	934	45	5	532	12	40	33.3333333333333	11.1111111111111	0.25	0.689202437604511	1.47462233908856	0.0423837333419417	0
444	Statistics_Low	Medical Science	343	56	1800	170	51	2282	287	119	16.3265306122449	30	2.19642857142857	0.222154603590443	3.89183500044088	1.2395948103764	1
445	Statistics_Low	Pharmacy	343	10	272	170	9	375	333	161	2.91545189504373	5.29411764705882	1.86149068322981	0.469388212717722	6.23421243178966	0.555827636877086	0
446	Statistics_Low	Population Health	343	7	87	170	5	115	336	165	2.04081632653061	2.94117647058824	1.45454545454545	0.593206489676183	6.70062067628384	0.315747239181462	0
447	Biological Science_Top	Geography-Geology	952	51	913	981	47	554	901	934	5.35714285714286	4.79102956167176	0.889007851534618	0.207521036540705	1.51697384273278	0.520994454766888	0
448	Biological Science_Top	Liberal Arts	952	345	3933	981	372	2408	607	609	36.2394957983193	37.9204892966361	1.07471978296566	0.0942136155257471	1.36979353016019	0.843209276775223	0
449	Biological Science_Top	Psychology	952	88	694	981	131	746	864	850	9.2436974789916	13.3537206931702	1.5131550802139	0.146051710519044	2.20401364575232	1.03884941964395	1
450	Biological Science_Top	Sports Science	952	12	130	981	12	117	940	969	1.26050420168067	1.22324159021407	0.970072239422085	0.410807117998175	2.79391431320033	0.336817827680423	0
451	Geography-Geology_Top	Sports Science	246	4	130	207	8	117	242	199	1.6260162601626	3.86473429951691	2.4321608040201	0.619804289298726	11.9984338279932	0.493014860223728	0
452	HighSchool_Low	Sports Science	1576	69	130	758	36	117	1507	722	4.37817258883249	4.74934036939314	1.08900397446706	0.210521122357944	1.87265157986987	0.633289005361832	0
453	Liberal Arts_Mid	Sports Science	1287	34	130	767	33	117	1253	734	2.64180264180264	4.30247718383312	1.65687610193941	0.248747416923359	3.1438826905648	0.87320001646905	0
454	Medical Science_Mid	Sports Science	559	18	130	799	26	117	541	773	3.22003577817531	3.2540675844806	1.01092424895788	0.311703679659682	2.25579392803608	0.453041310391681	0
455	Psychology_Top	Biological Science	143	116	2721	256	231	2890	27	25	81.1188811188811	90.234375	2.15068965517241	0.299977884220177	4.65634875672366	0.993367600780885	0
456	Psychology_Top	Sports Science	143	13	130	256	25	117	130	231	9.09090909090909	9.765625	1.08225108225108	0.35908827458494	2.72834586252816	0.429295794613191	0
457	Sports Science_Top	Biological Science	29	22	2721	32	28	2890	7	4	75.8620689655172	87.5	2.22727272727273	0.688495442269572	13.1136491626385	0.378288586199661	0
458	Sports Science_Top	Geography-Geology	29	3	913	32	4	554	26	28	10.3448275862069	12.5	1.23809523809524	0.810869383753732	9.98978192870671	0.153444772822238	0
459	Sports Science_Top	Liberal Arts	29	24	3933	32	26	2408	5	6	82.7586206896552	81.25	0.902777777777778	0.668427162669854	5.04764145084858	0.161463076168449	0
460	Sports Science_Top	Medical Science	29	23	1800	32	30	2282	6	2	79.3103448275862	93.75	3.91304347826087	0.862251854662873	36.0394430932431	0.424865312794766	0
461	Sports Science_Top	Psychology	29	18	694	32	25	746	11	7	62.0689655172414	78.125	2.18253968253968	0.573865654419037	9.56579056032854	0.497970286493165	0
462	Biological Science_Top	Finance-Marketing	952	58	1009	981	52	413	894	929	6.09243697478992	5.30071355759429	0.862774210311421	0.196639627335329	1.43153140634814	0.519988129270192	0
463	Finance-Marketing_Top	Geography-Geology	297	47	913	178	18	554	250	160	15.8249158249158	10.1123595505618	0.598404255319149	0.295096850712163	1.27939287550751	0.27988873444525	0
464	Finance-Marketing_Top	Psychology	297	38	694	178	48	746	259	130	12.7946127946128	26.9662921348315	2.5165991902834	0.242285852579818	4.69639189892631	1.34853981968221	1
465	Liberal Arts_Top	Biological Science	1026	562	2721	877	724	2890	464	153	54.775828460039	82.5541619156214	3.90686855999814	0.108865490521237	5.17099337080266	2.95177751170326	1
466	Liberal Arts_Top	Finance-Marketing	1026	194	1009	877	105	413	832	772	18.9083820662768	11.9726339794755	0.583302174029165	0.131056127531509	0.817437861321375	0.416229101105197	1
467	Psychology_Top	Finance-Marketing	143	18	1009	256	31	413	125	225	12.5874125874126	12.109375	0.95679012345679	0.316635538934165	2.16228448435228	0.423370443144388	0
468	Psychology_Top	Statistics	143	24	934	256	38	532	119	218	16.7832167832168	14.84375	0.864296636085627	0.284557504642193	1.79839811786261	0.415374475612079	0
469	Statistics_Top	Geography-Geology	281	52	913	201	35	554	229	166	18.5053380782918	17.4129353233831	0.928521779425394	0.241232473798231	1.72808209534944	0.498907255151535	0
470	Biological Science_Top	Physics-Maths	952	86	1600	981	58	551	866	923	9.03361344537815	5.91233435270133	0.632769785078989	0.176373026046528	0.99651800667015	0.401796654178717	1
471	AP1_Top	AP2	438	265	965	130	73	221	173	57	60.5022831050228	56.1538461538462	0.83608076795763	0.201981240496683	1.40645399013829	0.497016649993568	0
472	AP1_Top	Chemistry	438	104	839	130	38	820	334	92	23.7442922374429	29.2307692307692	1.32650501672241	0.223147375701593	2.35644038498642	0.746726108838038	0
473	AP2_Mid	Chemistry	289	65	839	60	19	820	224	41	22.4913494809689	31.6666666666667	1.59699812382739	0.311240620659818	3.55932276643824	0.716541649876941	0
474	AP2_Mid	Computer Science	289	262	3166	60	49	1224	27	11	90.6574394463668	81.6666666666667	0.459056210964608	0.390091124103797	1.25345286114683	0.168121683197863	0
475	Chemistry_Top	Computer Science	271	111	3166	282	71	1224	160	211	40.9594095940959	25.177304964539	0.485034797831006	0.184615417948105	0.780242943867841	0.301519875259281	1
476	Chemistry_Top	Liberal Arts	271	189	3933	282	198	2408	82	84	69.7416974169742	70.2127659574468	1.02267573696145	0.185583927637853	1.64921773868065	0.634158630749586	0
477	Chemistry_Top	Physics-Maths	271	87	1600	282	44	551	184	238	32.1033210332103	15.6028368794326	0.390997778421714	0.209422990337261	0.670461363939617	0.228020988163136	1
478	HighSchool_Mid	Chemistry	1393	250	839	954	227	820	1143	727	17.9468772433597	23.7945492662474	1.42757083906465	0.103226415227472	1.86224417306041	1.09435622354429	1
479	Liberal Arts_Top	Chemistry	1026	186	839	877	217	820	840	660	18.1286549707602	24.7434435575827	1.48484848484848	0.112651083982911	1.98454422439886	1.11097298606419	1
480	Liberal Arts_Top	Physics-Maths	1026	322	1600	877	151	551	704	726	31.3840155945419	17.2177879133409	0.454733672124976	0.111919487276244	0.606621228986158	0.340876155801306	1
481	Physics-Maths_Mid	Chemistry	554	122	839	180	45	820	432	135	22.0216606498195	25	1.18032786885246	0.200352603566612	1.97723659154086	0.704606562487339	0
482	AP2_Top	Chemistry	305	84	839	83	29	820	221	54	27.5409836065574	34.9397590361446	1.4129188712522	0.263497487505665	2.78476563274083	0.71687890473417	0
483	Chemistry_Mid	Physics-Maths	230	90	1600	221	44	551	140	177	39.1304347826087	19.9095022624434	0.386691776522285	0.215942025773969	0.674302382463248	0.221755897530305	1
484	HighSchool_Top	AP2	1112	109	965	1087	39	221	1003	1048	9.80215827338129	3.58785648574057	0.342434694306324	0.191746043020435	0.561059537162607	0.209000136523267	1
485	HighSchool_Top	Liberal Arts	1112	400	3933	1087	419	2408	712	668	35.9712230215827	38.5464581416743	1.11649700598802	0.0882504119815605	1.40135681594658	0.889541871274373	0
486	AP1_Mid	AP2	422	254	965	93	50	221	168	43	60.1895734597156	53.763440860215	0.769089910272844	0.230532433249391	1.39246229845757	0.424786574644566	0
487	AP1_Mid	Physics-Maths	422	250	1600	93	56	551	172	37	59.2417061611374	60.2150537634409	1.0412972972973	0.23387629929632	1.90160602934861	0.570202263047136	0
488	HighSchool_Top	PLS	1112	808	1953	1087	960	2274	304	127	72.6618705035971	88.3164673413063	2.84400093552662	0.115943002640457	3.83344958471095	2.10993809688674	1
489	HighSchool_Top	Surgery	1112	154	202	1087	113	150	958	974	13.8489208633094	10.3955841766329	0.721712579002107	0.131960597895439	1.013764095035	0.513797094650398	0
490	Surgery_Top	Biological Science	56	56	2721	60	60	2890	0	0	100	100	NA	Inf	NA	NA	NA
491	Surgery_Top	Medical Science	56	56	1800	60	60	2282	0	0	100	100	NA	Inf	NA	NA	NA
492	Computer Science_Top	Engineering	947	201	612	517	85	346	746	432	21.2249208025343	16.4410058027079	0.730260733370186	0.142811510912124	1.05483673456926	0.505557610221194	0
493	Computer Science_Top	Physics-Maths	947	427	1600	517	183	551	520	334	45.0897571277719	35.3965183752418	0.667236954662104	0.112798449227589	0.892120527488401	0.499041485930327	1
494	Engineering_Top	Computer Science	182	85	3166	133	53	1224	97	80	46.7032967032967	39.8496240601504	0.756029411764706	0.231175060854691	1.37108278623777	0.416882537794596	0
495	Engineering_Top	Finance-Marketing	182	21	1009	133	13	413	161	120	11.5384615384615	9.77443609022556	0.830555555555556	0.372943210153612	2.169872278717	0.317909278638315	0
496	Engineering_Top	Physics-Maths	182	96	1600	133	46	551	86	87	52.7472527472528	34.5864661654135	0.473659003831418	0.235112647366654	0.867749196315972	0.258545732871964	1
497	Engineering_Top	Statistics	182	30	934	133	15	532	152	118	16.4835164835165	11.2781954887218	0.64406779661017	0.339195406277278	1.54261169675778	0.268909750588657	0
498	Finance-Marketing_Top	Engineering	297	41	612	178	16	346	256	162	13.8047138047138	8.98876404494382	0.616681722372779	0.311398993910725	1.37499510911202	0.276580145040847	0
499	HighSchool_Top	Engineering	1112	146	612	1087	74	346	966	1013	13.1294964028777	6.80772769089236	0.483333107952778	0.149616817572664	0.710500311308669	0.328797735236744	1
500	Physics-Maths_Top	Computer Science	481	338	3166	211	144	1224	143	67	70.2702702702703	68.2464454976303	0.909299655568312	0.178385550012989	1.43945159787857	0.574403380311785	0
501	Physics-Maths_Top	Engineering	481	151	612	211	66	346	330	145	31.3929313929314	31.2796208530806	0.994747659282941	0.178047427564252	1.5733481735554	0.628928117933872	0
502	Physics-Maths_Top	Statistics	481	117	934	211	56	532	364	155	24.3243243243243	26.5402843601896	1.12401433691756	0.188687617650523	1.82718607975901	0.691450226986657	0
503	Statistics_Top	Engineering	281	49	612	201	17	346	232	184	17.4377224199288	8.45771144278607	0.437444543034605	0.298289825695334	0.942981100128006	0.202928487331059	1
504	Chemical Materials_Top	Engineering	5	5	612	1	1	346	0	0	100	100	NA	Inf	NA	NA	NA
505	Chemical Materials_Top	Food Science	5	5	297	1	1	341	0	0	100	100	NA	Inf	NA	NA	NA
506	Chemical Materials_Top	Physics-Maths	5	3	1600	1	1	551	2	0	60	100	Inf	Inf	Inf	NA	NA
507	Engineering_Top	Chemical Materials	182	6	13	133	4	7	176	129	3.2967032967033	3.00751879699248	0.909560723514212	0.655820419652347	4.92312781453984	0.168043719546823	0
508	Engineering_Top	Food Science	182	45	297	133	66	341	137	67	24.7252747252747	49.6240601503759	2.99900497512438	0.24412779559292	5.62324912148401	1.59943666846601	1
509	Food Science_Top	Chemical Materials	80	9	13	101	2	7	71	99	11.25	1.98019801980198	0.159371492704826	0.797054971914971	1.24097726085532	0.0204671539827076	0
510	Food Science_Top	Engineering	80	47	612	101	44	346	33	57	58.75	43.5643564356436	0.541993281075028	0.303068900456821	1.18281920352926	0.248353016127886	0
511	HighSchool_Top	Chemical Materials	1112	7	13	1087	2	7	1105	1085	0.629496402877698	0.183992640294388	0.290980908492429	0.80292202561574	2.30027020263729	0.0368086710030866	0
512	HighSchool_Top	Food Science	1112	43	297	1087	61	341	1069	1026	3.86690647482014	5.61177552897884	1.47805884219593	0.203861151622561	2.4984538966044	0.874403943960183	0
513	Physics-Maths_Top	Chemical Materials	481	3	13	211	3	7	478	208	0.623700623700624	1.4218009478673	2.29807692307692	0.820710916939432	19.0183302464801	0.277687761014462	0
514	Physics-Maths_Low	Chemistry	565	108	839	160	48	820	457	112	19.1150442477876	30	1.81349206349206	0.203000856718891	3.05867406337264	1.07522194134094	1
515	Computer Science_Top	Law	947	25	92	517	23	78	922	494	2.63991552270327	4.44874274661509	1.71708502024291	0.294256947353877	3.66320972399601	0.804862726649014	0
516	Finance-Marketing_Top	Law	297	14	92	178	15	78	283	163	4.71380471380471	8.42696629213483	1.86021034180543	0.384400541525354	5.0054181851395	0.691327355231449	0
517	Geography-Geology_Top	Law	246	15	92	207	11	78	231	196	6.09756097560976	5.31400966183575	0.864285714285714	0.408664658027934	2.47554263241321	0.301747902111541	0
518	HighSchool_Top	Law	1112	30	92	1087	21	78	1082	1066	2.69784172661871	1.93192272309108	0.710506566604127	0.287775401440196	1.49069815325663	0.33864641214235	0
519	Law_Low	Computer Science	34	23	3166	25	14	1224	11	11	67.6470588235294	56	0.608695652173913	0.544724714067866	2.47497241971944	0.149702838715845	0
520	Law_Low	Finance-Marketing	34	15	1009	25	9	413	19	16	44.1176470588235	36	0.7125	0.541211009427142	2.87094999133818	0.176825180352019	0
521	Law_Low	Geography-Geology	34	9	913	25	6	554	25	19	26.4705882352941	24	0.87719298245614	0.608612649166238	4.2044744741621	0.183011582826566	0
522	Law_Low	Liberal Arts	34	34	3933	25	21	2408	0	4	100	84	0	Inf	NA	0	NA
523	Law_Low	Physics-Maths	34	6	1600	25	2	551	28	23	17.6470588235294	8	0.405797101449275	0.863631410527962	3.75072399877513	0.0439038669863231	0
524	Law_Low	Statistics	34	7	934	25	5	532	27	20	20.5882352941176	20	0.964285714285714	0.655663160391203	5.21722156963184	0.178226461415386	0
525	Liberal Arts_Top	Law	1026	36	92	877	28	78	990	849	3.50877192982456	3.1927023945268	0.906949352179034	0.25628113626191	1.75462516763416	0.468793644700231	0
526	Physics-Maths_Top	Law	481	13	92	211	3	78	468	208	2.7027027027027	1.4218009478673	0.519230769230769	0.645910872102997	2.73960470868198	0.0984085736389616	0
527	Statistics_Top	Law	281	12	92	201	9	78	269	192	4.27046263345196	4.47761194029851	1.05078125	0.450965907687862	3.35607168094382	0.328998108598517	0
528	AP1_Mid	Finance-Marketing	422	86	1009	93	20	413	336	73	20.3791469194313	21.505376344086	1.07040458744823	0.279826245355794	2.20029023773613	0.520734020075957	0
529	AP1_Top	Biological Science	438	137	2721	130	53	2890	301	77	31.2785388127854	40.7692307692308	1.51227604512276	0.206098196800749	2.57106108536499	0.889507779363973	0
530	AP1_Top	Chinese	438	4	45	130	2	17	434	128	0.91324200913242	1.53846153846154	1.6953125	0.871846688050966	16.0045380692399	0.179579345572	0
531	AP1_Top	Pharmacy	438	7	272	130	6	375	431	124	1.59817351598174	4.61538461538462	2.97926267281106	0.56560455378974	12.7828901624696	0.694366137922795	0
532	AP1_Top	Psychology	438	24	694	130	9	746	414	121	5.47945205479452	6.92307692307692	1.28305785123967	0.404299022413972	3.63393527161892	0.453017824088639	0
533	AP2_Mid	Biological Science	289	94	2721	60	27	2890	195	33	32.5259515570934	45	1.6972920696325	0.28828210201227	3.56570037612987	0.807919921966107	0
534	AP2_Mid	Chinese	289	6	45	60	NA	NA	283	NA	2.07612456747405	NA	NA	NA	NA	NA	NA
535	AP2_Mid	Pharmacy	289	4	272	60	1	375	285	59	1.3840830449827	1.66666666666667	1.20762711864407	1.127145919778	22.0003446395872	0.0662882005521136	0
536	AP2_Mid	Psychology	289	20	694	60	6	746	269	54	6.9204152249135	10	1.49444444444444	0.488776694722799	5.2611756933666	0.424499071632741	0
537	Biological Science_Mid	Chinese	795	4	45	966	5	17	791	961	0.50314465408805	0.5175983436853	1.02887617065557	0.672536099573463	5.8138765373962	0.182079231943402	0
538	Biological Science_Mid	Pharmacy	795	112	272	966	166	375	683	800	14.0880503144654	17.184265010352	1.26537946428571	0.132916502577565	1.7818141721321	0.898626362770504	0
539	Biological Science_Mid	Psychology	795	151	694	966	236	746	644	730	18.9937106918239	24.4306418219462	1.37878980313889	0.117398733965231	1.86546042654968	1.01908424010685	1
540	Chemistry_Top	Chinese	271	5	45	282	1	17	266	281	1.8450184501845	0.354609929078014	0.18932384341637	1.09878028620714	3.20612474727742	0.0111797015123581	0
541	Chemistry_Top	Psychology	271	29	694	282	48	746	242	234	10.7011070110701	17.0212765957447	1.71175950486295	0.252431827693114	3.27898442533674	0.893606136048587	0
542	Chinese_Low	Biological Science	18	5	2721	4	3	2890	13	1	27.7777777777778	75	7.8	1.26895878981802	204.730118664093	0.297171712677128	0
543	Chinese_Low	Chemistry	18	2	839	4	2	820	16	2	11.1111111111111	50	8	1.25	199.974836609483	0.320040266491034	0
544	Chinese_Low	Computer Science	18	17	3166	4	4	1224	1	0	94.4444444444444	100	Inf	Inf	Inf	NA	NA
545	Chinese_Low	Liberal Arts	18	17	3933	4	4	2408	1	0	94.4444444444444	100	Inf	Inf	Inf	NA	NA
546	Chinese_Low	Pharmacy	18	1	272	4	NA	NA	17	NA	5.55555555555556	NA	NA	NA	NA	NA	NA
547	Chinese_Low	Physics-Maths	18	6	1600	4	2	551	12	2	33.3333333333333	50	2	1.11803398874989	35.5907118807489	0.112388873068976	0
548	Chinese_Low	Psychology	18	4	694	4	2	746	14	2	22.2222222222222	50	3.5	1.14953406710222	67.5462934222635	0.181357101616509	0
549	Computer Science_Mid	Chinese	1093	18	45	362	7	17	1075	355	1.64684354986276	1.93370165745856	1.17762128325509	0.449621877113746	3.7481893216481	0.369989818488031	0
550	Computer Science_Mid	Pharmacy	1093	25	272	362	27	375	1068	335	2.28728270814273	7.4585635359116	3.44310447761194	0.284531968769623	7.16381992949591	1.65483897702962	1
551	Computer Science_Mid	Psychology	1093	142	694	362	83	746	951	279	12.9917657822507	22.9281767955801	1.99235196122974	0.154033114601123	2.96225588393055	1.34001466887088	1
552	HighSchool_Mid	Chinese	1393	8	45	954	5	17	1385	949	0.574300071787509	0.524109014675052	0.912144362486828	0.571643037603379	3.97499628134226	0.209310217954607	0
553	HighSchool_Mid	Pharmacy	1393	98	272	954	145	375	1295	809	7.03517587939699	15.1991614255765	2.36844428748013	0.138235046468439	3.38105761866675	1.6591046280688	1
554	Liberal Arts_Mid	Chinese	1287	10	45	767	6	17	1277	761	0.777000777000777	0.782268578878748	1.00683311432326	0.518424355590814	3.82574259168026	0.264971543642891	0
555	Pharmacy_Top	Biological Science	73	70	2721	136	133	2890	3	3	95.8904109589041	97.7941176470588	1.9	0.829741633247882	16.0938722151411	0.224308976220385	0
556	Pharmacy_Top	Chemistry	73	39	839	136	65	820	34	71	53.4246575342466	47.7941176470588	0.7981220657277	0.290726525748472	1.68729570906825	0.377526493061023	0
557	Pharmacy_Top	Chinese	73	2	45	136	NA	NA	71	NA	2.73972602739726	NA	NA	NA	NA	NA	NA
558	Pharmacy_Top	Computer Science	73	18	3166	136	25	1224	55	111	24.6575342465753	18.3823529411765	0.688188188188188	0.350351798548805	1.69632294029854	0.279193879367328	0
559	Pharmacy_Top	Liberal Arts	73	49	3933	136	86	2408	24	50	67.1232876712329	63.2352941176471	0.842448979591837	0.306109027813158	1.85296779954685	0.383018141701594	0
560	Pharmacy_Top	Physics-Maths	73	11	1600	136	4	551	62	132	15.0684931506849	2.94117647058824	0.170798898071625	0.603832659553053	0.808641701308914	0.0360756358907308	1
561	Pharmacy_Top	Psychology	73	6	694	136	34	746	67	102	8.21917808219178	25	3.72222222222222	0.469901825997202	12.4823801691365	1.10995964582637	1
562	Physics-Maths_Top	Biological Science	481	140	2721	211	95	2890	341	116	29.1060291060291	45.0236966824645	1.99476600985222	0.170945646060821	3.09786075354491	1.28446426441486	1
563	Physics-Maths_Top	Chemistry	481	80	839	211	45	820	401	166	16.6320166320166	21.3270142180095	1.35881024096386	0.207942502134122	2.32114694658018	0.795453848222991	0
564	Physics-Maths_Top	Chinese	481	5	45	211	4	17	476	207	1.03950103950104	1.8957345971564	1.83961352657005	0.67596727599088	10.4873654833113	0.322690949650298	0
565	Physics-Maths_Top	Pharmacy	481	12	272	211	8	375	469	203	2.49480249480249	3.7914691943128	1.54022988505747	0.464103046606855	5.08857090700701	0.466203211506291	0
566	Physics-Maths_Top	Psychology	481	22	694	211	19	746	459	192	4.57380457380457	9.00473933649289	2.06463068181818	0.324766234348215	4.76465159680201	0.894650902736749	0
567	Psychology_Mid	Chinese	233	1	45	248	NA	NA	232	NA	0.429184549356223	NA	NA	NA	NA	NA	NA
568	Psychology_Mid	Pharmacy	233	21	272	248	40	375	212	208	9.01287553648069	16.1290322580645	1.94139194139194	0.286607259257011	4.06095799016257	0.928106786436048	0
569	Psychology_Mid	Physics-Maths	233	46	1600	248	22	551	187	226	19.7424892703863	8.87096774193548	0.395729126587149	0.277427554927909	0.808439549385738	0.193708412395726	1
570	Surgery_Mid	Biological Science	74	74	2721	43	43	2890	0	0	100	100	NA	Inf	NA	NA	NA
571	Surgery_Mid	Medical Science	74	74	1800	43	43	2282	0	0	100	100	NA	Inf	NA	NA	NA
572	AP2_Mid	Engineering	289	49	612	60	10	346	240	50	16.9550173010381	16.6666666666667	0.979591836734694	0.380229969797191	2.60771115642162	0.3679856046304	0
573	AP2_Mid	Medical Science	289	11	1800	60	6	2282	278	54	3.80622837370242	10	2.80808080808081	0.52885858071552	10.960655727685	0.71942026285842	0
574	Engineering_Top	Biological Science	182	84	2721	133	99	2890	98	34	46.1538461538462	74.4360902255639	3.39705882352941	0.248237020495146	6.4373716834336	1.79265843546318	1
575	Engineering_Top	Medical Science	182	73	1800	133	90	2282	109	43	40.1098901098901	67.6691729323308	3.12519910799618	0.239248546762966	5.78670476081221	1.68781195314503	1
576	HighSchool_Low	Engineering	1576	124	612	758	70	346	1452	688	7.86802030456853	9.23482849604222	1.19139159789947	0.156500555976646	1.78266772728947	0.796230232822845	0
577	Medical Science_Mid	Engineering	559	66	612	799	75	346	493	724	11.8067978533095	9.38673341677096	0.773794575590156	0.178590205555581	1.22558824957747	0.488547475401447	0
578	Medical Science_Mid	Physics-Maths	559	41	1600	799	36	551	518	763	7.3345259391771	4.50563204005006	0.596106511523831	0.235391460338377	1.09285888521709	0.325149914492872	0
579	Physics-Maths_Top	Medical Science	481	70	1800	211	60	2282	411	151	14.5530145530146	28.436018957346	2.33301797540208	0.200019967835722	3.90482947916551	1.39390795490318	1
580	PLS_Low	Engineering	734	60	612	976	110	346	674	866	8.17438692098093	11.2704918032787	1.42686682063125	0.168511096649104	2.2020683544244	0.924562091693344	0
581	Geography-Geology_Mid	Finance-Marketing	343	59	1009	181	21	413	284	160	17.201166180758	11.6022099447514	0.631779661016949	0.272652392107577	1.2748969176272	0.313080637780167	0
582	Biological Science_Top	Engineering	952	83	612	981	53	346	869	928	8.71848739495798	5.4026503567788	0.597956481096801	0.182056176749029	0.955574406406597	0.374174895108619	1
583	HighSchool_Mid	Engineering	1393	205	612	954	97	346	1188	857	14.7164393395549	10.167714884696	0.655923954805476	0.13113328759807	0.91939245347149	0.46795710891812	1
584	Medical Science_Top	Engineering	663	45	612	694	27	346	618	667	6.78733031674208	3.89048991354467	0.55592203898051	0.249753143346421	1.05758407454413	0.292221981082177	0
585	PLS_Top	Engineering	578	54	612	478	33	346	524	445	9.34256055363322	6.90376569037657	0.71960049937578	0.230167627565976	1.30163681122203	0.397825932885009	0
586	Biological Science_Top	Optometry	952	110	213	981	157	337	842	824	11.5546218487395	16.0040774719674	1.45845101500441	0.133647209217283	2.05755109670091	1.03379175689876	1
587	Chemistry_Top	Optometry	271	46	213	282	57	337	225	225	16.9741697416974	20.2127659574468	1.23913043478261	0.219480930772571	2.18054156025539	0.704157289359211	0
588	Medical Science_Mid	Optometry	559	106	213	799	171	337	453	628	18.9624329159213	21.4017521902378	1.1636672274967	0.1381368078652	1.66076560131672	0.815359744491481	0
589	Optometry_Top	Biological Science	63	61	2721	119	117	2890	2	2	96.8253968253968	98.3193277310924	1.91803278688525	1.01239342706774	26.0030319666334	0.141477723685739	0
590	Optometry_Top	Chemistry	63	21	839	119	29	820	42	90	33.3333333333333	24.3697478991597	0.644444444444444	0.342085429623029	1.55504319206876	0.267072094263054	0
591	Optometry_Top	Medical Science	63	63	1800	119	119	2282	0	0	100	100	NA	Inf	NA	NA	NA
592	Optometry_Top	Pharmacy	63	21	272	119	32	375	42	87	33.3333333333333	26.890756302521	0.735632183908046	0.337894694101779	1.75602687895397	0.308169946876711	0
593	Pharmacy_Mid	Optometry	62	27	213	90	41	337	35	49	43.5483870967742	45.5555555555556	1.08465608465608	0.332275296668607	2.55198593218442	0.461005214466225	0
594	PLS_Mid	Optometry	649	94	213	833	165	337	555	668	14.4838212634823	19.8079231692677	1.45838641865206	0.141413265724161	2.09901836683744	1.01327886392596	1
595	Finance-Marketing_Mid	Food Science	338	24	297	133	10	341	314	123	7.10059171597633	7.5187969924812	1.06368563685637	0.391128446093193	2.9121616540839	0.388517969964981	0
596	Food Science_Top	Biological Science	80	52	2721	101	89	2890	28	12	65	88.1188118811881	3.99358974358974	0.386670846243375	10.808879158007	1.4755238546904	1
597	Food Science_Top	Chemistry	80	27	839	101	48	820	53	53	33.75	47.5247524752475	1.77777777777778	0.30920255404342	3.9414974776282	0.801851033801073	0
598	Food Science_Top	Computer Science	80	37	3166	101	30	1224	43	71	46.25	29.7029702970297	0.491054434716407	0.312571082085503	1.0981975490155	0.219572933914139	0
599	Food Science_Top	Finance-Marketing	80	18	1009	101	13	413	62	88	22.5	12.8712871287129	0.508838383838384	0.399964124766626	1.42515815197764	0.181675627022846	0
600	Food Science_Top	Medical Science	80	43	1800	101	83	2282	37	18	53.75	82.1782178217822	3.96770025839793	0.34334616541787	9.60518467309148	1.63897372890637	1
601	AP1_Top	Law	438	11	92	130	6	78	427	124	2.51141552511416	4.61538461538462	1.8782991202346	0.517669966368049	7.12326941444034	0.495279257291896	0
602	HighSchool_Top	AP1	1112	97	1322	1087	55	368	1015	1032	8.72302158273381	5.05979760809568	0.557670023175897	0.174485846002684	0.873989607281452	0.355834728648959	1
603	Law_Mid	Computer Science	37	27	3166	29	19	1224	10	10	72.972972972973	65.5172413793103	0.703703703703704	0.538208710431562	2.81366961029789	0.175997530340416	0
604	Law_Mid	Physics-Maths	37	12	1600	29	3	551	25	26	32.4324324324324	10.3448275862069	0.240384615384615	0.703653469492054	1.47166234627329	0.0392649601044278	0
605	AP1_Top	Statistics	438	62	934	130	10	532	376	120	14.1552511415525	7.69230769230769	0.505376344086022	0.356541638605483	1.26572214886751	0.201786189323046	0
606	AP2_Mid	Statistics	289	64	934	60	14	532	225	46	22.1453287197232	23.3333333333333	1.06997282608696	0.336507275267264	2.5450224871636	0.449835651487867	0
607	Physics-Maths_Mid	Psychology	554	47	694	180	25	746	507	155	8.48375451263538	13.8888888888889	1.73987645847632	0.264008702954425	3.43369355480019	0.881607529165851	0
608	Psychology_Low	Physics-Maths	318	72	1600	242	31	551	246	211	22.6415094339623	12.8099173553719	0.501974723538705	0.234417001406288	0.91797811046673	0.274493062741599	1
609	Computer Science_Top	Sports Science	947	24	130	517	10	117	923	507	2.53431890179514	1.93423597678917	0.758547008547009	0.380424075043987	2.02029085121071	0.284807290906058	0
610	Finance-Marketing_Top	Sports Science	297	11	130	178	6	117	286	172	3.7037037037037	3.37078651685393	0.906976744186047	0.516610312092812	3.43024979163266	0.239809595353928	0
611	Food Science_Mid	Computer Science	91	53	3166	130	40	1224	38	90	58.2417582417582	30.7692307692308	0.318658280922432	0.285122473882886	0.664018279980435	0.152922145461766	1
612	Food Science_Mid	Finance-Marketing	91	18	1009	130	11	413	73	119	19.7802197802198	8.46153846153846	0.374883286647993	0.4105686762847	1.07904220925134	0.130242799960077	0
613	Food Science_Mid	Liberal Arts	91	72	3933	130	109	2408	19	21	79.1208791208791	83.8461538461539	1.36970899470899	0.351160685985647	3.38325096454668	0.554526622425157	0
614	Food Science_Mid	Sports Science	91	6	130	130	10	117	85	120	6.59340659340659	7.69230769230769	1.18055555555556	0.535504160471562	4.68754199733816	0.297322439040442	0
615	Food Science_Mid	Statistics	91	17	934	130	16	532	74	114	18.6813186813187	12.3076923076923	0.6109391124871	0.378957745335598	1.62102427381198	0.230253553383752	0
616	HighSchool_Mid	Sports Science	1393	36	130	954	35	117	1357	919	2.58435032304379	3.66876310272537	1.43558819973401	0.241193418871224	2.67152030799255	0.771438447632149	0
617	Liberal Arts_Top	Food Science	1026	79	297	877	123	341	947	754	7.69980506822612	14.0250855188141	1.95549474532451	0.152218708787538	2.89390384845351	1.32138450316354	1
618	Liberal Arts_Top	Sports Science	1026	28	130	877	31	117	998	846	2.72904483430799	3.53477765108324	1.30606214116852	0.264870510505336	2.58327552122586	0.660323803085566	0
619	Sports Science_Top	Computer Science	29	10	3166	32	5	1224	19	27	34.4827586206897	15.625	0.351851851851852	0.624234423902115	1.75568408703425	0.0705136684702219	0
620	Sports Science_Top	Finance-Marketing	29	6	1009	32	2	413	23	30	20.6896551724138	6.25	0.255555555555556	0.862251854662873	2.35368708596613	0.0277473766010409	0
621	Sports Science_Top	Food Science	29	6	297	32	7	341	23	25	20.6896551724138	21.875	1.07333333333333	0.626898772046472	5.39263109125536	0.213633090220577	0
622	Sports Science_Top	Statistics	29	6	934	32	3	532	23	29	20.6896551724138	9.375	0.396551724137931	0.760237475720748	2.80853418631849	0.0559912251318891	0
623	Statistics_Top	Sports Science	281	7	130	201	5	117	274	196	2.49110320284698	2.48756218905473	0.998542274052478	0.592966119360934	4.59711516119586	0.216893995061572	0
624	Biological Science_Mid	Law	795	15	92	966	24	78	780	942	1.88679245283019	2.48447204968944	1.32484076433121	0.332681462875	3.12035582332496	0.562500929449582	0
625	Chemistry_Mid	Engineering	230	45	612	221	63	346	185	158	19.5652173913043	28.5067873303167	1.63924050632911	0.223225799191523	2.91258051047337	0.922587179282265	0
626	Chemistry_Mid	Law	230	4	92	221	3	78	226	218	1.73913043478261	1.35746606334842	0.777522935779817	0.769639700156962	5.64166983618615	0.107156557050907	0
627	Engineering_Top	Chemistry	182	37	839	133	67	820	145	66	20.3296703296703	50.3759398496241	3.97829647829648	0.252983135874723	7.63150659091167	2.07388183194054	1
628	Engineering_Top	Law	182	3	92	133	3	78	179	130	1.64835164835165	2.25563909774436	1.37692307692308	0.82458811932852	11.5094192191592	0.164727439644155	0
629	Engineering_Top	Liberal Arts	182	101	3933	133	99	2408	81	34	55.4945054945055	74.4360902255639	2.3351776354106	0.248514474263066	4.42828658824101	1.23141411023443	1
630	Law_Top	Biological Science	21	11	2721	24	19	2890	10	5	52.3809523809524	79.1666666666667	3.45454545454545	0.665988490783782	19.1942595142471	0.621742364620144	0
631	Law_Top	Chemistry	21	2	839	24	5	820	19	19	9.52380952380952	20.8333333333333	2.5	0.897364562424178	25.204044561634	0.247976073233653	0
632	Law_Top	Computer Science	21	9	3166	24	9	1224	12	15	42.8571428571429	37.5	0.8	0.610100173924104	3.84919638960702	0.166268471447189	0
633	Law_Top	Engineering	21	2	612	24	3	346	19	21	9.52380952380952	12.5	1.35714285714286	0.966221485943958	16.3365017587086	0.112743643767677	0
634	Law_Top	Liberal Arts	21	13	3933	24	20	2408	8	4	61.9047619047619	83.3333333333333	3.07692307692308	0.708465296908096	19.0721324613705	0.496402572731579	0
635	Law_Top	Statistics	21	3	934	24	5	532	18	19	14.2857142857143	20.8333333333333	1.57894736842105	0.800949728657334	12.4187068631787	0.200751561310759	0
636	Liberal Arts_Top	Engineering	1026	204	612	877	135	346	822	742	19.8830409356725	15.3933865450399	0.733114000317108	0.121957460201356	1.00359283531652	0.535532058966371	0
637	Computer Science_Mid	Food Science	1093	72	297	362	48	341	1021	314	6.58737419945105	13.2596685082873	2.16772823779193	0.197196266515113	3.60189505247148	1.30460372788936	1
638	Finance-Marketing_Low	Food Science	374	24	297	102	10	341	350	92	6.41711229946524	9.80392156862745	1.58514492753623	0.394199663547803	4.37427142151372	0.574423532324917	0
639	Finance-Marketing_Low	Medical Science	374	31	1800	102	21	2282	343	81	8.28877005347594	20.5882352941176	2.86857825567503	0.30844487845086	6.34750668484805	1.29637377595429	1
640	Food Science_Mid	Biological Science	91	60	2721	130	117	2890	31	13	65.9340659340659	90	4.65	0.366598986159102	11.951533648853	1.8091820376605	1
641	Food Science_Mid	Medical Science	91	50	1800	130	112	2282	41	18	54.9450549450549	86.1538461538462	5.10222222222222	0.329961165724947	11.9332208225579	2.1815293617736	1
642	Food Science_Mid	Psychology	91	11	694	130	23	746	80	107	12.0879120879121	17.6923076923077	1.56329651656754	0.39526338835159	4.32581243224176	0.564956534059828	0
643	HighSchool_Top	Psychology	1112	116	694	1087	164	746	996	923	10.431654676259	15.0873965041398	1.52560989277842	0.129636762971289	2.13018520032442	1.09262121649748	1
644	Medical Science_Low	Psychology	578	144	694	789	212	746	434	577	24.9134948096886	26.8694550063371	1.10735605622954	0.125294354601437	1.52899125237152	0.801991138514559	0
645	Psychology_Mid	Finance-Marketing	233	47	1009	248	40	413	186	208	20.1716738197425	16.1290322580645	0.761047463175123	0.237614461130619	1.4032594144175	0.412748516243319	0
646	Psychology_Mid	Food Science	233	17	297	248	21	341	216	227	7.29613733905579	8.46774193548387	1.17543405027209	0.339819794897317	2.8198211352738	0.489976186523227	0
647	Psychology_Mid	Medical Science	233	108	1800	248	172	2282	125	76	46.3519313304721	69.3548387096774	2.61939571150097	0.190344707004092	4.27627056851717	1.60449012369413	1
648	Statistics_Mid	Psychology	310	59	694	161	44	746	251	117	19.0322580645161	27.3291925465839	1.59988410835868	0.228489600554761	2.88144503268593	0.88831441556	0
649	PLS_Mid	Surgery	649	50	202	833	53	150	599	780	7.70416024653313	6.3625450180072	0.814025641025641	0.204497982611458	1.3782559448084	0.480779891966528	0
650	Ancient History_Mid	Computer Science	24	16	3166	21	12	1224	8	9	66.6666666666667	57.1428571428571	0.666666666666667	0.618016540591305	3.27372173808267	0.135761216133398	0
651	Ancient History_Mid	Law	24	2	92	21	NA	NA	22	NA	8.33333333333333	NA	NA	NA	NA	NA	NA
652	Ancient History_Mid	Liberal Arts	24	23	3933	21	19	2408	1	2	95.8333333333333	90.4761904761905	0.41304347826087	1.26337240741475	10.6865028761286	0.0159645224365151	0
653	Ancient History_Mid	Psychology	24	7	694	21	8	746	17	13	29.1666666666667	38.0952380952381	1.49450549450549	0.635298157711782	7.67285008739959	0.291097395057289	0
654	Ancient History_Mid	Sports Science	24	3	130	21	1	117	21	20	12.5	4.76190476190476	0.35	1.19622421851105	7.61755337059768	0.0160812788621642	0
655	Ancient History_Mid	Statistics	24	5	934	21	3	532	19	18	20.8333333333333	14.2857142857143	0.633333333333333	0.800949728657334	4.98128130845279	0.080523681814649	0
656	AP2_Top	Ancient History	305	7	76	83	3	72	298	80	2.29508196721311	3.6144578313253	1.59642857142857	0.701460035132767	9.71847372446926	0.262241197118908	0
657	AP2_Top	Law	305	6	92	83	2	78	299	81	1.9672131147541	2.40963855421687	1.23045267489712	0.826048925478608	10.3238640472486	0.146651852274728	0
658	AP2_Top	Psychology	305	21	694	83	5	746	284	78	6.88524590163934	6.02409638554217	0.866910866910867	0.513771045505801	3.2548341707602	0.230897923439406	0
659	AP2_Top	Sports Science	305	4	130	83	NA	NA	301	NA	1.31147540983607	NA	NA	NA	NA	NA	NA
660	Computer Science_Top	Ancient History	947	12	76	517	6	72	935	511	1.26715945089757	1.1605415860735	0.914872798434442	0.503017361409131	3.3410978953366	0.250514131442696	0
661	HighSchool_Top	Ancient History	1112	11	76	1087	15	72	1101	1072	0.989208633093525	1.37994480220791	1.40052578018996	0.399270407881796	3.91560175922567	0.500937679976062	0
662	HighSchool_Top	Sports Science	1112	10	130	1087	21	117	1102	1066	0.899280575539568	1.93192272309108	2.17091932457786	0.386606485899191	5.87474368449172	0.802229163847061	0
663	Law_Low	Ancient History	34	4	76	25	3	72	30	22	11.7647058823529	12	1.02272727272727	0.813708308991135	8.31259431018877	0.125829679080827	0
664	Law_Low	Psychology	34	12	694	25	14	746	22	11	35.2941176470588	56	2.33333333333333	0.539560507381277	9.36206763148314	0.581542951701785	0
665	Law_Low	Sports Science	34	1	130	25	1	117	33	24	2.94117647058824	4	1.375	1.43943381125	55.9800733898267	0.0337731783028278	0
666	Liberal Arts_Top	Ancient History	1026	14	76	877	18	72	1012	859	1.364522417154	2.05245153933865	1.51471811076002	0.359355553220647	3.82122062029597	0.600428811379829	0
667	Psychology_Top	Ancient History	143	3	76	256	7	72	140	249	2.0979020979021	2.734375	1.31191432396252	0.698104145232186	7.917738012131	0.217375112788659	0
668	Psychology_Top	Law	143	9	92	256	16	78	134	240	6.29370629370629	6.25	0.992592592592592	0.430395706699012	3.00667244204597	0.327684532938098	0
669	Sports Science_Mid	Ancient History	47	1	76	40	1	72	46	39	2.12765957446809	2.5	1.17948717948718	1.43086692465645	46.9724885980972	0.0296171237269932	0
670	Sports Science_Mid	Computer Science	47	34	3166	40	15	1224	13	25	72.3404255319149	37.5	0.229411764705882	0.461520864420695	0.752901729480096	0.0699025592912501	1
671	Sports Science_Mid	Law	47	1	92	40	NA	NA	46	NA	2.12765957446809	NA	NA	NA	NA	NA	NA
672	Sports Science_Mid	Liberal Arts	47	43	3933	40	35	2408	4	5	91.4893617021277	87.5	0.651162790697674	0.708397658469392	4.03549255555067	0.105070935989206	0
673	Sports Science_Mid	Psychology	47	28	694	40	22	746	19	18	59.5744680851064	55	0.829365079365079	0.435150509216932	2.54318625422561	0.270466401635884	0
674	Sports Science_Mid	Statistics	47	18	934	40	6	532	29	34	38.2978723404255	15	0.284313725490196	0.53489881804767	1.12714453362537	0.0717159974525336	0
675	Statistics_Top	Ancient History	281	4	76	201	2	72	277	199	1.42348754448399	0.995024875621891	0.695979899497487	0.870996689965806	6.55600863218118	0.0738845916289431	0
676	Biological Science_Mid	Food Science	795	85	297	966	116	341	710	850	10.6918238993711	12.008281573499	1.13993079584775	0.151559614772491	1.68410381739816	0.771592704617017	0
677	Engineering_Mid	Biological Science	244	106	2721	79	58	2890	138	21	43.4426229508197	73.4177215189873	3.59568733153639	0.285553438090207	7.5009919136482	1.72363435863019	1
678	Engineering_Mid	Computer Science	244	150	3166	79	33	1224	94	46	61.4754098360656	41.7721518987342	0.449565217391304	0.263338423472193	0.885699184942594	0.228191340947424	1
679	Engineering_Mid	Finance-Marketing	244	33	1009	79	6	413	211	73	13.5245901639344	7.59493670886076	0.525529265255293	0.464120311556793	1.73630692781616	0.159062320270262	0
680	Engineering_Mid	Food Science	244	37	297	79	29	341	207	50	15.1639344262295	36.7088607594937	3.24486486486486	0.293837886464821	6.91509195427372	1.52263311332067	1
681	Engineering_Mid	Liberal Arts	244	188	3933	79	63	2408	56	16	77.0491803278689	79.746835443038	1.17287234042553	0.318668021091431	2.66452521591532	0.516275664691995	0
682	Engineering_Mid	Medical Science	244	66	1800	79	47	2282	178	32	27.0491803278689	59.4936708860759	3.96117424242424	0.270732503449966	7.95401397339391	1.97270226470951	1
683	Engineering_Mid	Physics-Maths	244	108	1600	79	26	551	136	53	44.2622950819672	32.9113924050633	0.617749825296995	0.271922164277887	1.24424367591665	0.306704268658089	0
684	Engineering_Mid	Statistics	244	24	934	79	5	532	220	74	9.83606557377049	6.32911392405063	0.619369369369369	0.509632843060212	2.30078669582307	0.1667335856946	0
685	Finance-Marketing_Mid	Engineering	338	25	612	133	9	346	313	124	7.39644970414201	6.76691729323308	0.908709677419355	0.402952249552049	2.56477926912986	0.321958808609576	0
686	Finance-Marketing_Mid	Physics-Maths	338	115	1600	133	32	551	223	101	34.0236686390533	24.0601503759398	0.614377959535084	0.233089998081553	1.11970109935707	0.337108070519204	0
687	Food Science_Low	Engineering	126	26	612	110	51	346	100	59	20.6349206349206	46.3636363636364	3.32464146023468	0.29157937879961	7.04401793799325	1.5691670487512	1
688	Food Science_Low	Physics-Maths	126	26	1600	110	13	551	100	97	20.6349206349206	11.8181818181818	0.515463917525773	0.368366520920578	1.33090054990787	0.19964155119585	0
689	Liberal Arts_Mid	Engineering	1287	175	612	767	98	346	1112	669	13.5975135975136	12.7770534550196	0.930822122571001	0.135323376522278	1.31886380740703	0.656951702671288	0
690	Medical Science_Low	Engineering	578	66	612	789	109	346	512	680	11.4186851211073	13.8149556400507	1.24349376114082	0.16658193273406	1.90956113587216	0.809755029544997	0
691	Medical Science_Low	Physics-Maths	578	91	1600	789	73	551	487	716	15.7439446366782	9.25221799746515	0.545628952053533	0.167742890344238	0.840399280114669	0.354249414966676	1
692	Physics-Maths_Low	Engineering	565	42	612	160	15	346	523	145	7.43362831858407	9.375	1.28817733990148	0.315094887437784	2.89967203615314	0.572271911563178	0
693	Physics-Maths_Low	Food Science	565	22	297	160	8	341	543	152	3.89380530973451	5	1.29904306220096	0.422936299516981	3.860083667135	0.437170026085194	0
694	Physics-Maths_Low	Medical Science	565	41	1800	160	28	2282	524	132	7.25663716814159	17.5	2.7110125646711	0.263796671963555	5.34733676223224	1.37443917460259	1
695	Geography-Geology_Mid	Medical Science	343	42	1800	181	72	2282	301	109	12.2448979591837	39.7790055248619	4.73394495412844	0.224042370459766	8.42891441380962	2.65873322808949	1
696	Geography-Geology_Mid	Statistics	343	81	934	181	41	532	262	140	23.6151603498542	22.6519337016575	0.947266313932981	0.218393163699718	1.66227540504242	0.539810350793993	0
697	Medical Science_Low	Geography-Geology	578	64	913	789	135	554	514	654	11.0726643598616	17.1102661596958	1.65782683486239	0.162809657843151	2.5212189074725	1.09010360276295	1
698	Physics-Maths_Mid	Medical Science	554	55	1800	180	43	2282	499	137	9.92779783393502	23.8888888888889	2.84764432647644	0.225257431008017	5.0861948902527	1.59433100482522	1
699	Biological Science_Mid	Surgery	795	10	202	966	13	150	785	953	1.25786163522013	1.34575569358178	1.07082896117524	0.423374869609348	3.1855449326397	0.3599618552991	0
700	Computer Science_Low	Surgery	1126	1	202	345	NA	NA	1125	NA	0.088809946714032	NA	NA	NA	NA	NA	NA
701	HighSchool_Low	Surgery	1576	7	202	758	6	150	1569	752	0.444162436548223	0.79155672823219	1.78837386018237	0.558113738755419	7.52664676767457	0.424927748372564	0
702	Medical Science_Mid	Surgery	559	13	202	799	8	150	546	791	2.32558139534884	1.00125156445557	0.424778761061947	0.452790018946685	1.3630808804601	0.132374386902425	0
703	PLS_Low	Surgery	734	10	202	976	10	150	724	966	1.36239782016349	1.02459016393443	0.749482401656315	0.44990711503263	2.38724117562796	0.235302522479639	0
704	Surgery_Low	Computer Science	72	5	3166	47	NA	NA	67	NA	6.94444444444444	NA	NA	NA	NA	NA	NA
705	Engineering_Low	Finance-Marketing	186	22	1009	134	16	413	164	118	11.8279569892473	11.9402985074627	1.01078582434515	0.350038116069296	2.48948589457861	0.410401193644858	0
706	Engineering_Low	Statistics	186	39	934	134	36	532	147	98	20.9677419354839	26.865671641791	1.38461538461538	0.265378232226933	2.74222969949914	0.699124425522695	0
707	Finance-Marketing_Low	Engineering	374	10	612	102	10	346	364	92	2.67379679144385	9.80392156862745	3.95652173913044	0.462186994586222	13.0071187227878	1.20349976084916	1
708	AP1_Top	Finance-Marketing	438	61	1009	130	18	413	377	112	13.9269406392694	13.8461538461538	0.993266978922717	0.289015725352405	2.09061797200742	0.471907973923588	0
709	AP2_Top	Finance-Marketing	305	30	1009	83	11	413	275	72	9.83606557377049	13.2530120481928	1.40046296296296	0.376520486517901	3.69264543990424	0.531135886872979	0
710	PLS_Mid	Finance-Marketing	649	69	1009	833	61	413	580	772	10.6317411402157	7.32292917166867	0.664188631073065	0.184134925977497	1.06711457545135	0.413401285855479	0
711	PLS_Mid	Physics-Maths	649	65	1600	833	43	551	584	790	10.0154083204931	5.16206482593037	0.489036027263875	0.204006325612803	0.826956794990385	0.289200400082346	1
712	HighSchool_Mid	Optometry	1393	84	213	954	129	337	1309	825	6.03015075376884	13.5220125786164	2.43666666666667	0.147080804464049	3.55858878152373	1.66845477490158	1
713	Liberal Arts_Top	Optometry	1026	69	213	877	121	337	957	756	6.72514619883041	13.7970353477765	2.2198642742121	0.158508358881391	3.33877869651414	1.47592812936901	1
714	Medical Science_Top	Optometry	663	55	213	694	108	337	608	586	8.29562594268477	15.5619596541787	2.03735650015514	0.175477345902031	3.201140971914	1.296669389178	1
715	Optometry_Top	Liberal Arts	63	33	3933	119	56	2408	30	63	52.3809523809524	47.0588235294118	0.808080808080808	0.312036091448605	1.80470964981866	0.361828060516075	0
716	PLS_Top	Liberal Arts	578	127	3933	478	123	2408	451	355	21.9723183391003	25.7322175732218	1.23040922701564	0.145045831920524	1.78753904041019	0.846922406560595	0
717	PLS_Top	Optometry	578	55	213	478	67	337	523	411	9.51557093425606	14.0167364016736	1.55014377350144	0.193526037601091	2.55148930675761	0.941781614432434	0
718	HighSchool_Top	Pharmacy	1112	70	272	1087	115	375	1042	972	6.29496402877698	10.5795768169273	1.76116990005879	0.158018562018081	2.64554237596175	1.17243233185614	1
719	Liberal Arts_Top	Pharmacy	1026	98	272	877	126	375	928	751	9.55165692007797	14.3671607753706	1.58873882442458	0.143351783033303	2.29807393057731	1.09835067473216	1
720	Pharmacy_Top	Medical Science	73	64	1800	136	133	2282	9	3	87.6712328767123	97.7941176470588	6.234375	0.683804242043676	36.265767664821	1.07173883646554	1
721	HighSchool_Top	Optometry	1112	91	213	1087	153	337	1021	934	8.18345323741007	14.0754369825207	1.83792973621667	0.139910880357724	2.63507148783257	1.28193323439889	1
722	Biological Science_Top	Computer Science	952	171	3166	981	132	1224	781	849	17.9621848739496	13.4556574923547	0.710102700803835	0.126023715326827	0.982323491867468	0.513319542761106	1
723	Medical Science_Top	Psychology	663	52	694	694	75	746	611	619	7.84313725490196	10.806916426513	1.42366720516963	0.18925187624045	2.31766372395561	0.874513541427946	0
724	AP2_Low	Psychology	383	35	694	82	10	746	348	72	9.13838120104439	12.1951219512195	1.38095238095238	0.381226810020896	3.68559665873713	0.517427612144487	0
725	AP1_Top	Geography-Geology	438	64	913	130	32	554	374	98	14.6118721461187	24.6153846153846	1.90816326530612	0.244444018998414	3.58079372633454	1.01683797653178	1
726	AP1_Low	Chemistry	473	74	839	152	33	820	399	119	15.6448202959831	21.7105263157895	1.49523052464229	0.23393625376423	2.73099563857455	0.818644413137545	0
727	Computer Science_Top	Surgery	947	5	202	517	2	150	942	515	0.527983104540655	0.386847195357834	0.731650485436893	0.838452931712974	6.33800430940193	0.084460724024114	0
728	Liberal Arts_Mid	Surgery	1287	4	202	767	4	150	1283	763	0.310800310800311	0.521512385919166	1.68152031454784	0.708583120894315	10.4259706330034	0.271198785011593	0
729	Surgery_Mid	Computer Science	74	1	3166	43	1	1224	73	42	1.35135135135135	2.32558139534884	1.73809523809524	1.42741309856205	68.6059010152195	0.0440337494586533	0
730	Surgery_Mid	Liberal Arts	74	3	3933	43	NA	NA	71	NA	4.05405405405405	NA	NA	NA	NA	NA	NA
731	AP1_Mid	Geography-Geology	422	109	913	93	25	554	313	68	25.8293838862559	26.8817204301075	1.05572045331894	0.258988575922685	2.0567334307594	0.541900889482033	0
732	Computer Science_Mid	Optometry	1093	9	213	362	8	337	1084	354	0.823421774931381	2.20994475138122	2.72190834902699	0.48975348808688	9.60658177417616	0.771219694441024	0
733	Optometry_Mid	Biological Science	69	68	2721	111	111	2890	1	0	98.5507246376812	100	Inf	Inf	Inf	NA	NA
734	Optometry_Mid	Computer Science	69	20	3166	111	22	1224	49	89	28.9855072463768	19.8198198198198	0.60561797752809	0.356508995364817	1.51665123762306	0.241830900609709	0
735	Optometry_Mid	Medical Science	69	69	1800	111	111	2282	0	0	100	100	NA	Inf	NA	NA	NA
736	PLS_Top	Computer Science	578	56	3166	478	48	1224	522	430	9.68858131487889	10.0418410041841	1.04053156146179	0.207199822389127	1.77406095237395	0.610298044691927	0
737	AP1_Low	Chinese	473	3	45	152	1	17	470	151	0.634249471458774	0.657894736842105	1.03752759381898	1.15848327975163	20.4899600922951	0.0525361446819312	0
738	AP1_Low	Psychology	473	49	694	152	30	746	424	122	10.3594080338266	19.7368421052632	2.12780194044831	0.253567956327594	4.08788197579822	1.10755181401526	1
739	Biological Science_Low	Chinese	974	10	45	943	7	17	964	936	1.02669404517454	0.742311770943796	0.720940170940171	0.49493723170101	2.57864546067965	0.201561144407286	0
740	Chemistry_Low	Chinese	338	4	45	317	3	17	334	314	1.18343195266272	0.946372239747634	0.797770700636943	0.76779688634767	5.76118346894682	0.110470026553607	0
741	Chemistry_Low	Geography-Geology	338	87	913	317	77	554	251	240	25.7396449704142	24.2902208201893	0.925622605363985	0.180643284603283	1.47383489630023	0.581325092594552	0
742	Chemistry_Low	Physics-Maths	338	133	1600	317	50	551	205	267	39.3491124260355	15.7728706624606	0.288642955703866	0.190110925843385	0.470937840088858	0.176912426195661	1
743	Chinese_Low	Finance-Marketing	18	9	1009	4	1	413	9	3	50	25	0.333333333333333	1.24721912892465	8.27283262322428	0.0134308423935944	0
744	Chinese_Low	Geography-Geology	18	2	913	4	NA	NA	16	NA	11.1111111111111	NA	NA	NA	NA	NA	NA
745	Finance-Marketing_Low	Chinese	374	5	45	102	2	17	369	100	1.33689839572193	1.96078431372549	1.476	0.844221550957017	12.9773589505687	0.16787514380224	0
746	Geography-Geology_Low	Chemistry	324	55	839	166	43	820	269	123	16.9753086419753	25.9036144578313	1.70983000739098	0.230835841140579	3.0981223846718	0.943642080971036	0
747	Geography-Geology_Low	Chinese	324	3	45	166	NA	NA	321	NA	0.925925925925926	NA	NA	NA	NA	NA	NA
748	Liberal Arts_Low	Chinese	1620	20	45	764	4	17	1600	760	1.23456790123457	0.523560209424084	0.421052631578947	0.549491391628371	1.73315404493749	0.102290571964681	0
749	Physics-Maths_Low	Chinese	565	3	45	160	NA	NA	562	NA	0.530973451327434	NA	NA	NA	NA	NA	NA
750	Physics-Maths_Low	Psychology	565	65	694	160	27	746	500	133	11.5044247787611	16.875	1.5615962984384	0.248878382777881	2.96409097997827	0.822708552392141	0
751	Psychology_Low	Chinese	318	7	45	242	2	17	311	240	2.20125786163522	0.826446280991736	0.370238095238095	0.806374133766337	2.95294924435608	0.0464201162371904	0
752	AP1_Mid	Engineering	422	66	612	93	14	346	356	79	15.6398104265403	15.0537634408602	0.955887993862678	0.319448435889476	2.17594964662732	0.419918658608239	0
753	AP1_Mid	Psychology	422	29	694	93	9	746	393	84	6.87203791469194	9.67741935483871	1.45197044334975	0.400053947485398	4.06762981649485	0.518291551461281	0
754	Biological Science_Low	Engineering	974	83	612	943	128	346	891	815	8.52156057494867	13.5737009544009	1.68597826890384	0.149030269045529	2.47464985465363	1.14865653331543	1
755	Computer Science_Low	Engineering	1126	54	612	345	20	346	1072	325	4.79573712255773	5.79710144927536	1.22165242165242	0.269310745081471	2.44410634946951	0.610625899995372	0
756	Engineering_Low	Psychology	186	16	694	134	10	746	170	124	8.60215053763441	7.46268656716418	0.856854838709677	0.420055792806395	2.52731357029558	0.290506181444798	0
757	Psychology_Low	Engineering	318	9	612	242	7	346	309	235	2.83018867924528	2.89256198347107	1.02269503546099	0.51133141803715	3.81568321772951	0.274106909791877	0
758	Chemistry_Top	Engineering	271	50	612	282	65	346	221	217	18.450184501845	23.0496453900709	1.32396313364055	0.210992410274206	2.27945201299427	0.768991129993892	0
759	Chemistry_Top	Food Science	271	40	297	282	67	341	231	215	14.760147601476	23.758865248227	1.7996511627907	0.221145970467541	3.18051687096996	1.01830753903412	1
760	Engineering_Mid	Chemistry	244	49	839	79	30	820	195	49	20.0819672131148	37.9746835443038	2.43648479800083	0.281563252204812	5.03081358942247	1.18001950685886	1
761	Medical Science_Mid	Food Science	559	64	297	799	95	341	495	704	11.4490161001789	11.8898623279099	1.043701171875	0.172023173889829	1.6253657825708	0.670195071075208	0
762	PLS_Mid	Engineering	649	95	612	833	89	346	554	744	14.6379044684129	10.6842737094838	0.697594793435201	0.157833491435701	1.04739315801745	0.464618746172668	0
763	PLS_Mid	Food Science	649	61	297	833	97	341	588	736	9.39907550077042	11.6446578631453	1.27040270848182	0.172516946697271	1.98092732543381	0.814731071148468	0
764	HighSchool_Low	Japanese	1576	22	53	758	13	32	1554	745	1.39593908629442	1.71503957783641	1.23258084197682	0.352651960012018	3.0562510374172	0.49709775584802	0
765	Japanese_Mid	Computer Science	20	20	3166	11	8	1224	0	3	100	72.7272727272727	0	Inf	NA	0	NA
766	Japanese_Mid	Liberal Arts	20	18	3933	11	10	2408	2	1	90	90.9090909090909	1.11111111111111	1.28668393770792	30.5257825263095	0.0404434480973754	0
767	Food Science_Mid	Chemistry	91	36	839	130	70	820	55	60	39.5604395604396	53.8461538461538	1.78240740740741	0.277330086561081	3.6403866535075	0.872702948440873	0
768	Food Science_Mid	Engineering	91	34	612	130	52	346	57	78	37.3626373626374	40	1.11764705882353	0.281081672128026	2.30483926502644	0.541961848295116	0
769	AP2_Low	Chemistry	383	68	839	82	16	820	315	66	17.7545691906005	19.5121951219512	1.12299465240642	0.309082514353464	2.4890133533655	0.506673452606512	0
770	AP2_Low	Statistics	383	72	934	82	28	532	311	54	18.798955613577	34.1463414634146	2.23971193415638	0.267090110646752	4.45534407635222	1.12590845107289	1
771	Statistics_Low	Geography-Geology	343	92	913	170	59	554	251	111	26.8221574344023	34.7058823529412	1.45015667841755	0.202019282529646	2.43969067124814	0.861975830273247	0
772	Biological Science_Top	Food Science	952	21	297	981	36	341	931	945	2.20588235294118	3.6697247706422	1.68888888888889	0.278440550766398	3.45926199037672	0.824553239086039	0
773	Biological Science_Mid	Optometry	795	79	213	966	145	337	716	821	9.93710691823899	15.0103519668737	1.60070306356866	0.148894104697001	2.34866073818293	1.09094100142383	1
774	Optometry_Top	Computer Science	63	7	3166	119	18	1224	56	101	11.1111111111111	15.1260504201681	1.42574257425743	0.475574212262241	4.85154096539865	0.418988915593576	0
775	Optometry_Top	Psychology	63	7	694	119	16	746	56	103	11.1111111111111	13.4453781512605	1.24271844660194	0.48262099371905	4.30617627219109	0.358635838365005	0
776	Pharmacy_Mid	Psychology	62	13	694	90	20	746	49	70	20.9677419354839	22.2222222222222	1.07692307692308	0.402016112207082	3.03223345269335	0.382478239787019	0
777	Psychology_Top	Optometry	143	15	213	256	35	337	128	221	10.4895104895105	13.671875	1.35143288084465	0.327987015163593	3.14474242461606	0.580769609978801	0
778	Psychology_Top	Pharmacy	143	10	272	256	41	375	133	215	6.99300699300699	16.015625	2.53627906976744	0.369540530504596	6.5683649788174	0.979347454120702	0
779	AP2_Low	Finance-Marketing	383	63	1009	82	8	413	320	74	16.4490861618799	9.75609756097561	0.549120549120549	0.396877222055549	1.52580412271252	0.197622599767523	0
780	PLS_Top	Chemistry	578	50	839	478	41	820	528	437	8.65051903114187	8.57740585774059	0.990755148741419	0.220391725833411	1.74756054979559	0.561694852216964	0
781	PLS_Top	Pharmacy	578	31	272	478	37	375	547	441	5.36332179930796	7.74058577405858	1.48043303342843	0.251755474228865	2.83092915551847	0.774191739201149	0
782	AP1_Mid	Chemistry	422	89	839	93	29	820	333	64	21.0900473933649	31.1827956989247	1.69540028089888	0.253666546237127	3.25798929180517	0.882256464041159	0
783	AP1_Mid	Food Science	422	16	297	93	8	341	406	85	3.7914691943128	8.60215053763441	2.38823529411765	0.449141136024686	7.59198547277815	0.7512748595898	0
784	AP2_Mid	Food Science	289	16	297	60	3	341	273	57	5.5363321799308	5	0.898026315789474	0.645786494629192	4.73671717878727	0.170255312574286	0
785	Engineering_Top	Geography-Geology	182	19	913	133	9	554	163	124	10.4395604395604	6.76691729323308	0.622665534804754	0.421831928038484	1.84498555477316	0.21014385030313	0
786	Geography-Geology_Low	Engineering	324	12	612	166	5	346	312	161	3.7037037037037	3.01204819277108	0.807453416149068	0.541063435895168	3.25231949612676	0.200466473243866	0
787	Geography-Geology_Low	Food Science	324	11	297	166	15	341	313	151	3.39506172839506	9.03614457831325	2.8266104756171	0.409137094762822	8.10601437063124	0.985654159436943	0
788	Medical Science_Top	Finance-Marketing	663	27	1009	694	22	413	636	672	4.07239819004525	3.1700288184438	0.771164021164021	0.29249274311289	1.63773571078661	0.363119606918889	0
789	Pharmacy_Top	Finance-Marketing	73	9	1009	136	9	413	64	127	12.3287671232877	6.61764705882353	0.503937007874016	0.495702771800051	1.80602922003668	0.14061373154298	0
790	Pharmacy_Top	Statistics	73	11	934	136	13	532	62	123	15.0684931506849	9.55882352941176	0.595713229859571	0.438282193787342	1.84150056430062	0.192709282369674	0
791	Biological Science_Mid	Population Health	795	32	87	966	54	115	763	912	4.0251572327044	5.59006211180124	1.41180098684211	0.228419845320199	2.54224433329313	0.784024572440073	0
792	HighSchool_Mid	Population Health	1393	38	87	954	43	115	1355	911	2.72792534099067	4.50733752620545	1.68308394476862	0.226731792318767	3.01760103740532	0.938749533163483	0
793	Liberal Arts_Mid	Population Health	1287	19	87	767	33	115	1268	734	1.47630147630148	4.30247718383312	3.00043023089058	0.29169444733091	6.35898574488364	1.41572601852197	1
794	Medical Science_Low	Population Health	578	35	87	789	50	115	543	739	6.05536332179931	6.33713561470215	1.04968103614924	0.2275219311858	1.88580600001879	0.58427551807575	0
795	Psychology_Top	Surgery	143	2	202	256	4	150	141	252	1.3986013986014	1.5625	1.11904761904762	0.872387787941701	10.5790595956095	0.118372295985161	0
796	Surgery_Low	Liberal Arts	72	6	3933	47	7	2408	66	40	8.33333333333333	14.8936170212766	1.925	0.59133351391184	8.82518676759909	0.41989196348851	0
797	Surgery_Low	Psychology	72	1	694	47	NA	NA	71	NA	1.38888888888889	NA	NA	NA	NA	NA	NA
798	AP2_Top	Engineering	305	83	612	83	16	346	222	67	27.2131147540984	19.2771084337349	0.638734040640173	0.306558429030939	1.40652318315276	0.290063597642252	0
799	AP2_Top	Food Science	305	16	297	83	4	341	289	79	5.24590163934426	4.81927710843374	0.914556962025316	0.573252505847605	4.00206179504517	0.208995882528479	0
800	AP2_Top	Medical Science	305	19	1800	83	9	2282	286	74	6.22950819672131	10.8433734939759	1.83072546230441	0.425150217062742	5.47106953488414	0.612596074124046	0
801	Engineering_Low	Food Science	186	25	297	134	52	341	161	82	13.4408602150538	38.8059701492537	4.08390243902439	0.278634296715628	8.36901608879398	1.99285781679896	1
802	Engineering_Low	Medical Science	186	38	1800	134	74	2282	148	60	20.4301075268817	55.2238805970149	4.80350877192982	0.251500947136628	9.17939762141	2.51363950812957	1
803	Food Science_Top	Statistics	80	7	934	101	7	532	73	94	8.75	6.93069306930693	0.776595744680851	0.556822425665142	3.25757288721265	0.185138129379647	0
804	HighSchool_Low	Optometry	1576	13	213	758	15	337	1563	743	0.824873096446701	1.97889182058048	2.42726990371674	0.381543488839014	6.48337762572812	0.908729912956044	0
805	Optometry_Mid	Liberal Arts	69	33	3933	111	53	2408	36	58	47.8260869565217	47.7477477477478	0.996865203761755	0.306904076088042	2.19709992736795	0.452296330309124	0
806	Optometry_Mid	Psychology	69	10	694	111	15	746	59	96	14.4927536231884	13.5135135135135	0.921875	0.440491187057932	2.86600526718046	0.296528944087069	0
807	PLS_Top	Psychology	578	39	694	478	37	746	539	441	6.74740484429066	7.74058577405858	1.15954415954416	0.238308442850376	2.14185270034802	0.627747490625522	0
808	Biological Science_Top	Chinese	952	6	45	981	3	17	946	978	0.630252100840336	0.305810397553517	0.483640081799591	0.708575738605237	2.99866816581038	0.0780038723157292	0
809	Biological Science_Top	Japanese	952	4	53	981	5	32	948	976	0.420168067226891	0.509683995922528	1.21413934426229	0.672368531747738	6.85778454124953	0.214957810123483	0
810	Biological Science_Top	Law	952	16	92	981	11	78	936	970	1.68067226890756	1.12130479102956	0.66340206185567	0.394345527187159	1.83137250421548	0.240312822575048	0
811	Chinese_Mid	Biological Science	16	8	2721	6	5	2890	8	1	50	83.3333333333333	5	1.20415945787923	111.068654205628	0.225086008098343	0
812	Chinese_Mid	Japanese	16	4	53	6	1	32	12	5	25	16.6666666666667	0.6	1.23827837473378	14.5521855385669	0.0247385520921178	0
813	Chinese_Mid	Law	16	1	92	6	NA	NA	15	NA	6.25	NA	NA	NA	NA	NA	NA
814	Chinese_Mid	Liberal Arts	16	16	3933	6	6	2408	0	0	100	100	NA	Inf	NA	NA	NA
815	Chinese_Mid	Medical Science	16	5	1800	6	2	2282	11	4	31.25	33.3333333333333	1.1	1.02024952384654	15.2176007755373	0.0795131911953628	0
816	HighSchool_Top	Chinese	1112	8	45	1087	4	17	1104	1083	0.719424460431655	0.367985280588776	0.509695290858726	0.613864120254323	2.47628117593702	0.104911062624081	0
817	HighSchool_Top	Japanese	1112	7	53	1087	6	32	1105	1081	0.629496402877698	0.551977920883165	0.876172855821329	0.557990910570754	3.68634226820503	0.208249483478349	0
818	Japanese_Top	Biological Science	16	8	2721	9	8	2890	8	1	50	88.8888888888889	8	1.17260393995586	163.841039603328	0.390622521408244	0
819	Japanese_Top	Chinese	16	3	45	9	1	17	13	8	18.75	11.1111111111111	0.541666666666667	1.23905464377339	13.1636762189336	0.0222888175687405	0
820	Japanese_Top	Law	16	2	92	9	2	78	14	7	12.5	22.2222222222222	2	1.10194633003868	34.1464620517911	0.117142443452357	0
821	Japanese_Top	Liberal Arts	16	14	3933	9	9	2408	2	0	87.5	100	Inf	Inf	Inf	NA	NA
822	Japanese_Top	Medical Science	16	8	1800	9	5	2282	8	4	50	55.5555555555556	1.25	0.836660026534076	10.7783890942043	0.144966004320643	0
823	Law_Mid	Biological Science	37	19	2721	29	21	2890	18	8	51.3513513513513	72.4137931034483	2.48684210526316	0.529911485176507	9.73313213278069	0.63539501695256	0
824	Law_Mid	Chinese	37	1	45	29	1	17	36	28	2.7027027027027	3.44827586206897	1.28571428571429	1.43648601228556	51.9491788001631	0.0318207383190551	0
825	Law_Mid	Japanese	37	2	53	29	1	32	35	28	5.40540540540541	3.44827586206897	0.625	1.25071408174919	15.6517875554411	0.0249572132650245	0
826	Law_Mid	Liberal Arts	37	33	3933	29	26	2408	4	3	89.1891891891892	89.6551724137931	1.05050505050505	0.807525790360842	8.40351406286116	0.13132135590916	0
827	Law_Mid	Medical Science	37	11	1800	29	16	2282	26	13	29.7297297297297	55.1724137931034	2.90909090909091	0.51845318621232	11.0547210879542	0.765538076449245	0
828	Liberal Arts_Top	Chinese	1026	12	45	877	5	17	1014	872	1.16959064327485	0.570125427594071	0.484518348623853	0.534290478689303	1.9178370326455	0.122407705220582	0
829	Liberal Arts_Top	Japanese	1026	10	53	877	6	32	1016	871	0.974658869395711	0.684150513112885	0.699885189437428	0.51845831487294	2.65964109850886	0.184174954533713	0
830	Medical Science_Mid	Chinese	559	4	45	799	4	17	555	795	0.715563506261181	0.500625782227785	0.69811320754717	0.709266990235005	4.33615711698224	0.112394924215979	0
831	Medical Science_Mid	Japanese	559	2	53	799	4	32	557	795	0.35778175313059	0.500625782227785	1.40125786163522	0.867786375654553	13.0909378433649	0.14999105627789	0
832	Medical Science_Mid	Law	559	10	92	799	14	78	549	785	1.78890876565295	1.75219023779725	0.979108280254777	0.417760637690607	2.87088574009898	0.333922388854951	0
833	PLS_Mid	Chinese	649	3	45	833	5	17	646	828	0.462249614791988	0.600240096038415	1.30032206119163	0.732181022984092	8.567518270905	0.197354404082646	0
834	PLS_Mid	Japanese	649	5	53	833	6	32	644	827	0.770416024653313	0.720288115246098	0.934461910519952	0.607806426044121	4.46968141797139	0.195364944512962	0
835	PLS_Mid	Law	649	8	92	833	14	78	641	819	1.2326656394453	1.68067226890756	1.36965811965812	0.446329065883087	4.32260619249329	0.433988959716767	0
836	Finance-Marketing_Mid	Psychology	338	33	694	133	30	746	305	103	9.76331360946746	22.5563909774436	2.69196822594881	0.276810025152687	5.49071466784517	1.31980868937812	1
837	AP1_Top	Engineering	438	156	612	130	40	346	282	90	35.6164383561644	30.7692307692308	0.803418803418803	0.214633331083846	1.39626620163708	0.462291340240202	0
838	AP1_Top	Food Science	438	18	297	130	9	341	420	121	4.10958904109589	6.92307692307692	1.73553719008264	0.421084411795944	5.13258456163319	0.586856251853261	0
839	AP2_Mid	Finance-Marketing	289	55	1009	60	11	413	234	49	19.0311418685121	18.3333333333333	0.955102040816327	0.365749335788487	2.44945963838235	0.372416795148318	0
840	Physics-Maths_Mid	Food Science	554	16	297	180	11	341	538	169	2.88808664259928	6.11111111111111	2.18860946745562	0.4014785009585	6.15382312960056	0.778379764929528	0
841	Computer Science_Top	Population Health	947	18	87	517	11	115	929	506	1.90073917634636	2.12765957446809	1.1219806763285	0.386674743569356	3.03673537663066	0.414537482502437	0
842	Finance-Marketing_Mid	Pharmacy	338	15	272	133	8	375	323	125	4.43786982248521	6.01503759398496	1.37813333333333	0.450291729769563	4.39396114267728	0.432241301817069	0
843	Finance-Marketing_Mid	Population Health	338	7	87	133	2	115	331	131	2.07100591715976	1.50375939849624	0.721919302071974	0.80840081561046	5.78801953515946	0.0900424533017282	0
844	Geography-Geology_Top	Pharmacy	246	10	272	207	19	375	236	188	4.0650406504065	9.17874396135266	2.38510638297872	0.402725732998441	6.72789617543807	0.845544031861556	0
845	Geography-Geology_Top	Population Health	246	7	87	207	7	115	239	200	2.84552845528455	3.38164251207729	1.195	0.543045473356234	4.83793646338867	0.295172334487369	0
846	Pharmacy_Low	Geography-Geology	137	19	913	149	27	554	118	122	13.8686131386861	18.1208053691275	1.37446074201898	0.326098012209623	3.18280806996409	0.593545790328691	0
847	Pharmacy_Low	Physics-Maths	137	15	1600	149	16	551	122	133	10.9489051094891	10.738255033557	0.978446115288221	0.380633925144125	2.60737194100348	0.367173085460972	0
848	Physics-Maths_Low	Pharmacy	565	4	272	160	6	375	561	154	0.707964601769911	3.75	5.46428571428571	0.651876295284979	29.2773702612006	1.01984632161162	1
849	Population Health_Low	Chemistry	45	13	839	47	8	820	32	39	28.8888888888889	17.0212765957447	0.504930966469428	0.508737754215374	1.87136134501027	0.136240540384974	0
850	Population Health_Low	Finance-Marketing	45	6	1009	47	5	413	39	42	13.3333333333333	10.6382978723404	0.773809523809524	0.64507148140126	4.0740171835814	0.146975614524027	0
851	Population Health_Low	Medical Science	45	39	1800	47	40	2282	6	7	86.6666666666667	85.1063829787234	0.879120879120879	0.600137346917216	4.12275156681895	0.187460609153946	0
852	Population Health_Low	Pharmacy	45	26	272	47	19	375	19	28	57.7777777777778	40.4255319148936	0.495879120879121	0.423602386762116	1.4760255791103	0.166593388355823	0
853	Population Health_Low	Statistics	45	6	934	47	6	532	39	41	13.3333333333333	12.7659574468085	0.951219512195122	0.619164439286364	4.68486926641812	0.193136352142547	0
854	Liberal Arts_Low	Optometry	1620	11	213	764	17	337	1609	747	0.679012345679012	2.22513089005236	3.32883047340879	0.389477614820554	9.07502278852813	1.22105614265815	1
855	Engineering_Mid	Pharmacy	244	4	272	79	2	375	240	77	1.63934426229508	2.53164556962025	1.55844155844156	0.875873095632969	14.8657445430693	0.163378301304799	0
856	Pharmacy_Mid	Engineering	62	1	612	90	NA	NA	61	NA	1.61290322580645	NA	NA	NA	NA	NA	NA
857	AP1_Low	Sports Science	473	13	130	152	3	117	460	149	2.74841437632135	1.97368421052632	0.712441920495612	0.647411563609936	3.77359410583734	0.134506646937548	0
858	Chemistry_Low	Sports Science	338	12	130	317	15	117	326	302	3.55029585798817	4.73186119873817	1.34933774834437	0.395447522360075	3.73553588693233	0.487403257314776	0
859	Chinese_Top	Biological Science	11	7	2721	7	7	2890	4	0	63.6363636363636	100	Inf	Inf	Inf	NA	NA
860	Chinese_Top	Chemistry	11	5	839	7	NA	NA	6	NA	45.4545454545455	NA	NA	NA	NA	NA	NA
861	Chinese_Top	Computer Science	11	9	3166	7	5	1224	2	2	81.8181818181818	71.4285714285714	0.555555555555556	1.14503760248784	10.5982104511698	0.0291220840283063	0
862	Chinese_Top	Geography-Geology	11	1	913	7	2	554	10	5	9.09090909090909	28.5714285714286	4	1.34164078649987	126.598338594411	0.126383965047598	0
863	Chinese_Top	Liberal Arts	11	9	3933	7	5	2408	2	2	81.8181818181818	71.4285714285714	0.555555555555556	1.14503760248784	10.5982104511698	0.0291220840283063	0
864	Chinese_Top	Psychology	11	3	694	7	2	746	8	5	27.2727272727273	28.5714285714286	1.06666666666667	1.07625895273086	17.0458253189322	0.0667481777203296	0
865	Chinese_Top	Sports Science	11	1	130	7	NA	NA	10	NA	9.09090909090909	NA	NA	NA	NA	NA	NA
866	Chinese_Top	Statistics	11	2	934	7	2	532	9	5	18.1818181818182	28.5714285714286	1.8	1.14503760248784	34.3382018617903	0.0943555522517123	0
867	Computer Science_Mid	Sports Science	1093	30	130	362	18	117	1063	344	2.74473924977127	4.97237569060773	1.85406976744186	0.304526845130963	4.06144866258234	0.846391272703235	0
868	HighSchool_Low	Chinese	1576	20	45	758	7	17	1556	751	1.26903553299492	0.923482849604222	0.725166444740346	0.441397071016294	2.25972559177234	0.232712491504292	0
869	Sports Science_Mid	Biological Science	47	29	2721	40	33	2890	18	7	61.7021276595745	82.5	2.92610837438424	0.513028739288959	10.9651530957154	0.780847302714559	0
870	Sports Science_Mid	Chemistry	47	15	839	40	6	820	32	34	31.9148936170213	15	0.376470588235294	0.54221314816151	1.52087146503408	0.0931900604782882	0
871	Sports Science_Mid	Chinese	47	1	45	40	NA	NA	46	NA	2.12765957446809	NA	NA	NA	NA	NA	NA
872	Sports Science_Mid	Geography-Geology	47	10	913	40	8	554	37	32	21.2765957446809	20	0.925	0.53223775422928	3.64206444344844	0.234928572320885	0
873	Statistics_Low	Chinese	343	3	45	170	1	17	340	169	0.87463556851312	0.588235294117647	0.670611439842209	1.15852996058248	13.2453859622064	0.0339529330840523	0
874	Statistics_Low	Sports Science	343	11	130	170	14	117	332	156	3.2069970845481	8.23529411764706	2.70862470862471	0.414439340483852	7.8744419619775	0.931703839789283	0
875	Liberal Arts_Top	Surgery	1026	8	202	877	10	150	1018	867	0.779727095516569	1.14025085518814	1.4677047289504	0.476587579368793	5.00737982124657	0.430196479652528	0
876	Surgery_Mid	Psychology	74	1	694	43	NA	NA	73	NA	1.35135135135135	NA	NA	NA	NA	NA	NA
877	Chemistry_Top	Geography-Geology	271	37	913	282	39	554	234	243	13.6531365313653	13.8297872340426	1.01501501501501	0.247096708353239	1.9177975716347	0.537207626051877	0
878	Chemistry_Top	Surgery	271	2	202	282	2	150	269	280	0.738007380073801	0.709219858156028	0.960714285714286	1.00363783342916	12.7341733862784	0.0724799255340793	0
879	Geography-Geology_Top	Surgery	246	2	202	207	1	150	244	206	0.813008130081301	0.483091787439614	0.592233009708738	1.22839437054546	14.0028429953877	0.0250477662217735	0
880	Medical Science_Top	Geography-Geology	663	10	913	694	13	554	653	681	1.50829562594268	1.87319884726225	1.24654919236417	0.42417319490089	3.71591543785503	0.418170142720129	0
881	PLS_Top	Geography-Geology	578	10	913	478	7	554	568	471	1.73010380622837	1.46443514644351	0.84416135881104	0.496730156612174	3.03335277459819	0.234924340379136	0
882	PLS_Top	Statistics	578	18	934	478	15	532	560	463	3.11418685121107	3.13807531380753	1.00791936645068	0.355201018751016	2.51564893504826	0.403832758662274	0
883	Statistics_Top	Surgery	281	1	202	201	3	150	280	198	0.355871886120996	1.49253731343284	4.24242424242424	1.15842792911569	83.7709910426595	0.214849594456195	0
884	Surgery_Top	Chemistry	56	1	839	60	NA	NA	55	NA	1.78571428571429	NA	NA	NA	NA	NA	NA
885	Surgery_Top	Geography-Geology	56	1	913	60	NA	NA	55	NA	1.78571428571429	NA	NA	NA	NA	NA	NA
886	Surgery_Top	Liberal Arts	56	3	3933	60	7	2408	53	53	5.35714285714286	11.6666666666667	2.33333333333333	0.716886549774147	14.7800858799653	0.368363518903804	0
887	Surgery_Top	Statistics	56	1	934	60	2	532	55	58	1.78571428571429	3.33333333333333	1.89655172413793	1.23912194617486	46.0983135381206	0.0780268987358101	0
888	Ancient History_Low	Computer Science	35	22	3166	22	11	1224	13	11	62.8571428571429	50	0.590909090909091	0.551539485618033	2.44518572104498	0.142800422362104	0
889	Ancient History_Low	Liberal Arts	35	34	3933	22	22	2408	1	0	97.1428571428571	100	Inf	Inf	Inf	NA	NA
890	Computer Science_Low	Ancient History	1126	19	76	345	14	72	1107	331	1.68738898756661	4.05797101449275	2.46430275083479	0.357749410592038	6.19110534396691	0.980889148282659	0
891	Liberal Arts_Low	Ancient History	1620	35	76	764	26	72	1585	738	2.16049382716049	3.40314136125654	1.5954316686024	0.262714475066756	3.13815206246894	0.811114999690885	0
892	Pharmacy_Mid	Geography-Geology	62	4	913	90	5	554	58	85	6.45161290322581	5.55555555555556	0.852941176470588	0.692102655097275	5.06877738837633	0.143527441585292	0
893	Population Health_Top	Geography-Geology	18	4	913	45	5	554	14	40	22.2222222222222	11.1111111111111	0.4375	0.739208070456872	2.93521941401427	0.0652102016926322	0
894	Geography-Geology_Mid	Chemistry	343	74	839	181	48	820	269	133	21.5743440233236	26.5193370165746	1.31192846982321	0.213502027995725	2.27337586321828	0.757092717389956	0
895	Geography-Geology_Mid	Pharmacy	343	12	272	181	12	375	331	169	3.49854227405248	6.62983425414365	1.9585798816568	0.419052472211099	5.76197199522247	0.665750398650224	0
896	Chemistry_Low	Engineering	338	41	612	317	60	346	297	257	12.1301775147929	18.9274447949527	1.69118344879947	0.219806652583052	2.97853235186837	0.960238506625313	0
897	Engineering_Low	Chemistry	186	50	839	134	91	820	136	43	26.8817204301075	67.910447761194	5.75627906976744	0.248188972597434	10.9067065033738	3.03801598757546	1
898	Medical Science_Top	Physics-Maths	663	34	1600	694	22	551	629	672	5.12820512820513	3.1700288184438	0.605654761904762	0.279184939632782	1.24291082036726	0.295127924390847	0
899	PLS_Top	Physics-Maths	578	26	1600	478	21	551	552	457	4.49826989619377	4.39330543933054	0.975593334455479	0.300133910264942	2.11305628131411	0.450429249164177	0
900	Ancient History_Top	Computer Science	17	10	3166	29	6	1224	7	23	58.8235294117647	20.6896551724138	0.182608695652174	0.673054284878549	1.03324578281189	0.0322729947535235	0
901	Ancient History_Top	Law	17	1	92	29	4	78	16	25	5.88235294117647	13.7931034482759	2.56	1.1629703349613	51.1445466071006	0.12813878379538	0
902	Ancient History_Top	Liberal Arts	17	13	3933	29	26	2408	4	3	76.4705882352941	89.6551724137931	2.66666666666667	0.83589350321554	22.9485561986123	0.309871830260987	0
903	Computer Science_Mid	Ancient History	1093	17	76	362	9	72	1076	353	1.55535224153705	2.48618784530387	1.61373104482586	0.416769564318722	4.71963065364442	0.551765185910027	0
904	Computer Science_Mid	Law	1093	21	92	362	11	78	1072	351	1.92131747483989	3.03867403314917	1.59978293311627	0.377239946450581	4.22602069120679	0.605606460568285	0
905	Liberal Arts_Low	Law	1620	16	92	764	16	78	1604	748	0.987654320987654	2.09424083769634	2.14438502673797	0.356314944665854	5.36750827774211	0.856707974157488	0
906	Biological Science_Mid	Sports Science	795	23	130	966	31	117	772	935	2.89308176100629	3.20910973084886	1.11285747500581	0.279465885019686	2.28543336591184	0.541889244354405	0
907	AP2_Low	Food Science	383	9	297	82	3	341	374	79	2.34986945169713	3.65853658536585	1.57805907172996	0.678068189110793	9.04508253050608	0.275317602185536	0
908	Computer Science_Low	Food Science	1126	40	297	345	20	341	1086	325	3.55239786856128	5.79710144927536	1.67076923076923	0.281065354303939	3.44535664648313	0.81021215186376	0
909	Engineering_Mid	Geography-Geology	244	17	913	79	6	554	227	73	6.9672131147541	7.59493670886076	1.09750201450443	0.493552542855399	3.91155306851953	0.307936681604879	0
910	Engineering_Mid	Psychology	244	8	694	79	4	746	236	75	3.27868852459016	5.06329113924051	1.57333333333333	0.626554563840155	7.89772317958244	0.313429291137633	0
911	Food Science_Low	Psychology	126	15	694	110	20	746	111	90	11.9047619047619	18.1818181818182	1.64444444444444	0.369846977528257	4.26208539809218	0.634477556943056	0
912	Psychology_Low	Food Science	318	11	297	242	18	341	307	224	3.45911949685535	7.43801652892562	2.24269480519481	0.392665584396138	6.16440772012013	0.815922667287449	0
913	Statistics_Low	Engineering	343	18	612	170	15	346	325	155	5.24781341107872	8.82352941176471	1.74731182795699	0.362974872687313	4.44926451854226	0.686202991841605	0
914	Statistics_Low	Food Science	343	20	297	170	13	341	323	157	5.83090379008746	7.64705882352941	1.33726114649682	0.3693081083687	3.46111911644212	0.516673166616767	0
915	Physics-Maths_Mid	Pharmacy	554	16	272	180	9	375	538	171	2.88808664259928	5	1.76973684210526	0.425814279219198	5.29785821096771	0.591176351949333	0
916	PLS_Mid	AP2	649	19	965	833	3	221	630	830	2.92758089368259	0.360144057623049	0.119847812301839	0.623503835710023	0.596897307305084	0.0240636001163855	1
917	Engineering_Low	Geography-Geology	186	28	913	134	19	554	158	115	15.0537634408602	14.1791044776119	0.932298136645963	0.321513033576584	2.13356317700394	0.407384147308956	0
918	Geography-Geology_Low	Medical Science	324	25	1800	166	36	2282	299	130	7.71604938271605	21.6867469879518	3.312	0.280739322282142	6.82406947693176	1.60744905031829	1
919	AP2_Top	Chinese	305	3	45	83	2	17	302	81	0.983606557377049	2.40963855421687	2.48559670781893	0.921406680366398	26.6592173215352	0.231746900871301	0
920	Chemistry_Top	Finance-Marketing	271	36	1009	282	20	413	235	262	13.2841328413284	7.09219858156028	0.498303647158609	0.293001520166438	1.05964427259565	0.234330077737628	0
921	Pharmacy_Mid	Finance-Marketing	62	13	1009	90	5	413	49	85	20.9677419354839	5.55555555555556	0.221719457013575	0.555963979112618	0.927989225058083	0.0529742332033192	1
922	PLS_Top	AP2	578	8	965	478	2	221	570	476	1.3840830449827	0.418410041841004	0.29936974789916	0.793003925779089	2.30691066353964	0.0388494653796837	0
923	Chemistry_Mid	Sports Science	230	9	130	221	4	117	221	217	3.91304347826087	1.80995475113122	0.452636968766001	0.608477027438025	2.16877713708974	0.0944680861808607	0
924	Food Science_Low	Sports Science	126	4	130	110	7	117	122	103	3.17460317460317	6.36363636363636	2.07281553398058	0.640907639237274	10.7967484081064	0.397949834107948	0
925	Medical Science_Low	Sports Science	578	35	130	789	47	117	543	742	6.05536332179931	5.95690747782003	0.982710820177127	0.230298401725108	1.77815800781285	0.543101654549276	0
926	PLS_Low	Sports Science	734	29	130	976	42	117	705	934	3.95095367847411	4.30327868852459	1.09318467104777	0.246538812275245	2.06252837042378	0.579411533024532	0
927	Sports Science_Low	Chemistry	54	10	839	45	11	820	44	34	18.5185185185185	24.4444444444444	1.42352941176471	0.492999115964974	5.06630630537847	0.399982919313006	0
928	Sports Science_Low	Food Science	54	1	297	45	7	341	53	38	1.85185185185185	15.5555555555556	9.76315789473684	1.08997286978123	161.627780858932	0.589745473030757	0
929	Sports Science_Low	Medical Science	54	15	1800	45	23	2282	39	22	27.7777777777778	51.1111111111111	2.71818181818182	0.42572350021088	8.13520728219903	0.908214399510301	0
930	Sports Science_Low	Statistics	54	12	934	45	11	532	42	34	22.2222222222222	24.4444444444444	1.13235294117647	0.476931559825758	3.86668087199358	0.33160822572097	0
931	Statistics_Mid	Sports Science	310	18	130	161	1	117	292	160	5.80645161290323	0.62111801242236	0.101388888888889	1.03209990460701	1.44609306721472	0.00710860664723531	0
932	Medical Science_Top	Food Science	663	7	297	694	19	341	656	675	1.05580693815988	2.73775216138329	2.6378835978836	0.445527320744638	8.3079241739467	0.837565405062875	0
933	PLS_Top	Food Science	578	18	297	478	23	341	560	455	3.11418685121107	4.81171548117155	1.57264957264957	0.320963133254642	3.59391411370079	0.68817077985431	0
934	AP1_Mid	Statistics	422	78	934	93	26	532	344	67	18.4834123222749	27.9569892473118	1.71144278606965	0.262896179433186	3.36791686186091	0.869687860516676	0
935	Biological Science_Low	Law	974	11	92	943	20	78	963	923	1.12936344969199	2.12089077412513	1.89697626317345	0.378194310013907	5.02342276134994	0.716348018870795	0
936	Chinese_Top	Finance-Marketing	11	5	1009	7	1	413	6	6	45.4545454545455	14.2857142857143	0.2	1.23827837473378	4.85072851285562	0.00824618403070594	0
937	Chinese_Top	Japanese	11	2	53	7	2	32	9	5	18.1818181818182	28.5714285714286	1.8	1.14503760248784	34.3382018617903	0.0943555522517123	0
938	Chinese_Top	Law	11	1	92	7	2	78	10	5	9.09090909090909	28.5714285714286	4	1.34164078649987	126.598338594411	0.126383965047598	0
939	Chinese_Top	Medical Science	11	4	1800	7	6	2282	7	1	36.3636363636364	85.7142857142857	10.5	1.24880895637556	261.663236426567	0.421343103087929	0
940	Computer Science_Mid	Japanese	1093	28	53	362	6	32	1065	356	2.56175663311985	1.65745856353591	0.641051364365971	0.454014215946095	2.0635770570582	0.199142964082626	0
941	Finance-Marketing_Low	Law	374	7	92	102	2	78	367	100	1.8716577540107	1.96078431372549	1.04857142857143	0.809680145796765	8.43470775761641	0.130354491514361	0
942	HighSchool_Mid	Japanese	1393	12	53	954	7	32	1381	947	0.861450107681263	0.733752620545073	0.850668778599085	0.477462621951896	2.90878017954981	0.248776918919756	0
943	HighSchool_Mid	Law	1393	29	92	954	33	78	1364	921	2.08183776022972	3.45911949685535	1.68527462653038	0.258078869890016	3.27553633992551	0.867079547312156	0
944	Japanese_Low	Chinese	17	2	45	12	2	17	15	10	11.7647058823529	16.6666666666667	1.5	1.08012344973464	24.2104169052345	0.0929352025951081	0
945	Japanese_Low	Law	17	1	92	12	NA	NA	16	NA	5.88235294117647	NA	NA	NA	NA	NA	NA
946	Japanese_Low	Medical Science	17	1	1800	12	NA	NA	16	NA	5.88235294117647	NA	NA	NA	NA	NA	NA
947	Law_Top	Chinese	21	1	45	24	1	17	20	23	4.76190476190476	4.16666666666667	0.869565217391304	1.44688571105999	36.0883018231857	0.020952597631263	0
948	Law_Top	Finance-Marketing	21	6	1009	24	10	413	15	14	28.5714285714286	41.6666666666667	1.78571428571429	0.636209010280352	9.18945560380823	0.347003745127471	0
949	Law_Top	Japanese	21	1	53	24	1	32	20	23	4.76190476190476	4.16666666666667	0.869565217391304	1.44688571105999	36.0883018231857	0.020952597631263	0
950	Law_Top	Medical Science	21	6	1800	24	15	2282	15	9	28.5714285714286	62.5	4.16666666666667	0.641179468722378	21.7182623073652	0.799378461564281	0
951	Law_Top	Psychology	21	6	694	24	13	746	15	11	28.5714285714286	54.1666666666667	2.95454545454545	0.633376271394423	15.0938702150297	0.578336683608357	0
952	Medical Science_Low	Chinese	578	4	45	789	5	17	574	784	0.69204152249135	0.633713561470215	0.915178571428571	0.67306587380644	5.17846433728552	0.161737488770865	0
953	Medical Science_Low	Japanese	578	9	53	789	3	32	569	786	1.55709342560554	0.380228136882129	0.241306191687871	0.668935107704608	1.35096513977308	0.0431015401009415	0
954	Medical Science_Low	Law	578	10	92	789	19	78	568	770	1.73010380622837	2.40811153358682	1.40155844155844	0.394576790531769	3.87141481562766	0.507402631506759	0
955	Psychology_Low	Law	318	7	92	242	8	78	311	234	2.20125786163522	3.30578512396694	1.51892551892552	0.524734295824323	5.86612336702226	0.393298024554553	0
956	Psychology_Low	Medical Science	318	83	1800	242	82	2282	235	160	26.1006289308176	33.8842975206612	1.45105421686747	0.186409854544335	2.34502418160383	0.897883423465943	0
957	Physics-Maths_Low	Sports Science	565	9	130	160	2	117	556	158	1.5929203539823	1.25	0.781997187060478	0.786917267688441	5.93227527769943	0.103083483477127	0
958	Sports Science_Low	Physics-Maths	54	7	1600	45	2	551	47	43	12.962962962963	4.44444444444444	0.312292358803987	0.8290895925986	2.64082196337584	0.0369303643789326	0
959	Chemistry_Top	Law	271	7	92	282	9	78	264	273	2.5830258302583	3.19148936170213	1.24332810047096	0.51129163538937	4.63839173523498	0.333276026187643	0
960	Law_Mid	Chemistry	37	9	839	29	8	820	28	21	24.3243243243243	27.5862068965517	1.18518518518519	0.565194165260439	5.07981077733746	0.276518946227104	0
961	Law_Mid	Pharmacy	37	4	272	29	5	375	33	24	10.8108108108108	17.2413793103448	1.71875	0.722474703342406	11.0449095050117	0.267462722185234	0
962	Medical Science_Top	Law	663	6	92	694	9	78	657	685	0.904977375565611	1.29682997118156	1.43868613138686	0.52986762668387	5.6301688174612	0.367629790820061	0
963	Pharmacy_Top	Law	73	1	92	136	5	78	72	131	1.36986301369863	3.67647058823529	2.74809160305344	1.10522507964448	47.3166048750521	0.159605860959704	0
964	PLS_Top	Law	578	6	92	478	3	78	572	475	1.03806228373702	0.627615062761506	0.602105263157895	0.709826397724223	3.74521857939337	0.096798288334124	0
965	Geography-Geology_Mid	Engineering	343	20	612	181	10	346	323	171	5.83090379008746	5.52486187845304	0.944444444444444	0.398677725046901	2.63645899791227	0.338323224198936	0
966	Liberal Arts_Mid	Law	1287	28	92	767	23	78	1259	744	2.17560217560218	2.9986962190352	1.39002496159754	0.285185753116968	2.89699797341647	0.666955728514236	0
967	Psychology_Mid	Law	233	12	92	248	21	78	221	227	5.15021459227468	8.46774193548387	1.70374449339207	0.374008762161826	4.46335637983014	0.650350330948539	0
968	Geography-Geology_Low	Pharmacy	324	5	272	166	9	375	319	157	1.54320987654321	5.42168674698795	3.65732484076433	0.566229047383608	15.7174531316852	0.851030054220859	0
969	Pharmacy_Low	Surgery	137	1	202	149	NA	NA	136	NA	0.72992700729927	NA	NA	NA	NA	NA	NA
970	Surgery_Low	Pharmacy	72	1	272	47	1	375	71	46	1.38888888888889	2.12765957446809	1.54347826086957	1.42682291735066	60.8314845376172	0.039162699379854	0
971	AP1_Mid	Japanese	422	4	53	93	1	32	418	92	0.947867298578199	1.0752688172043	1.13586956521739	1.12394924694801	20.5234432359122	0.0628646789116523	0
972	AP2_Low	Japanese	383	6	53	82	1	32	377	81	1.56657963446475	1.21951219512195	0.775720164609053	1.08704409550529	12.7454597414144	0.0472122454575593	0
973	Japanese_Mid	Physics-Maths	20	4	1600	11	2	551	16	9	20	18.1818181818182	0.888888888888889	0.961046882889233	10.558304300536	0.0748343137590772	0
974	Physics-Maths_Mid	Japanese	554	7	53	180	2	32	547	178	1.26353790613718	1.11111111111111	0.87800963081862	0.806413835415869	7.00355522795181	0.110072796846595	0
975	Optometry_Mid	Pharmacy	69	19	272	111	39	375	50	72	27.536231884058	35.1351351351351	1.42543859649123	0.334905200731913	3.37657014828336	0.601757139089761	0
976	Optometry_Mid	Chemistry	69	21	839	111	31	820	48	80	30.4347826086957	27.9279279279279	0.885714285714286	0.336467599433452	2.1065324595191	0.37240812140035	0
977	Pharmacy_Top	Optometry	73	16	213	136	47	337	57	89	21.9178082191781	34.5588235294118	1.8813202247191	0.33549427782003	4.46322475034291	0.793006399165805	0
978	Ancient History_Top	Biological Science	17	9	2721	29	25	2890	8	4	52.9411764705882	86.2068965517241	5.55555555555556	0.725335171566298	35.9646493989142	0.858181521207768	0
979	Ancient History_Top	Chemistry	17	4	839	29	5	820	13	24	23.5294117647059	17.2413793103448	0.677083333333333	0.754048899999028	4.71955726743267	0.0971366198777284	0
980	Ancient History_Top	Medical Science	17	7	1800	29	12	2282	10	17	41.1764705882353	41.3793103448276	1.00840336134454	0.620494968232814	4.98355151692163	0.204046719637222	0
981	Ancient History_Top	Pharmacy	17	3	272	29	1	375	14	28	17.6470588235294	3.44827586206897	0.166666666666667	1.20019839629796	3.66471804737162	0.00757978578944165	0
982	Ancient History_Top	Physics-Maths	17	9	1600	29	6	551	8	23	52.9411764705882	20.6896551724138	0.231884057971014	0.66802398059302	1.29517259941199	0.0415158692868552	0
983	Ancient History_Top	Population Health	17	2	87	29	1	115	15	28	11.7647058823529	3.44827586206897	0.267857142857143	1.26585186826143	6.97454485029479	0.0102870438888294	0
984	AP1_Top	Ancient History	438	6	76	130	5	72	432	125	1.36986301369863	3.84615384615385	2.88	0.613988176988353	13.9965357125746	0.592603782130762	0
985	AP1_Top	Medical Science	438	18	1800	130	13	2282	420	117	4.10958904109589	10	2.59259259259259	0.378690630207025	6.8742788865901	0.977780573359908	0
986	AP1_Top	Population Health	438	3	87	130	1	115	435	129	0.684931506849315	0.769230769230769	1.12403100775194	1.15904448658908	22.2304037682611	0.0568341321893437	0
987	AP2_Top	Pharmacy	305	3	272	83	4	375	302	79	0.983606557377049	4.81927710843374	5.09704641350211	0.774146510332237	37.4156288740914	0.694359093330237	0
988	AP2_Top	Population Health	305	2	87	83	1	115	303	82	0.655737704918033	1.20481927710843	1.84756097560976	1.23105460966775	43.9842668146475	0.0776068764083463	0
989	Biological Science_Top	Ancient History	952	9	76	981	12	72	943	969	0.945378151260504	1.22324159021407	1.29755761953904	0.44332480369992	4.0635017940789	0.414336171446301	0
990	Chemistry_Top	Ancient History	271	5	76	282	3	72	266	279	1.8450184501845	1.06382978723404	0.572043010752688	0.735307392333475	3.79952264252409	0.0861248206521052	0
991	HighSchool_Top	Population Health	1112	7	87	1087	27	115	1105	1060	0.629496402877698	2.48390064397424	4.02088948787062	0.426312741418974	12.0523354320819	1.34144559490374	1
992	Medical Science_Top	Ancient History	663	4	76	694	3	72	659	691	0.603318250377074	0.432276657060519	0.715267727930536	0.765700961223819	5.13757723576241	0.0995815535497227	0
993	Pharmacy_Top	Ancient History	73	3	76	136	1	72	70	135	4.10958904109589	0.735294117647059	0.172839506172839	1.16405603603368	3.46271328346691	0.00862719273833765	0
994	Pharmacy_Top	Population Health	73	16	87	136	28	115	57	108	21.9178082191781	20.5882352941176	0.923611111111111	0.353578003589968	2.29561134175627	0.371603619938236	0
995	Physics-Maths_Top	Ancient History	481	6	76	211	5	72	475	206	1.24740124740125	2.3696682464455	1.92152103559871	0.61124978425894	9.27279897373734	0.39817999944845	0
996	Physics-Maths_Top	Population Health	481	2	87	211	1	115	479	210	0.415800415800416	0.4739336492891	1.14047619047619	1.22753801873267	26.9061876513527	0.0483415174939394	0
997	Population Health_Mid	Ancient History	24	1	76	23	NA	NA	23	NA	4.16666666666667	NA	NA	NA	NA	NA	NA
998	Population Health_Mid	Physics-Maths	24	1	1600	23	NA	NA	23	NA	4.16666666666667	NA	NA	NA	NA	NA	NA
999	Chemistry_Low	Optometry	338	11	213	317	22	337	327	295	3.25443786982249	6.94006309148265	2.21694915254237	0.377904182098645	5.866365424854	0.837803851109508	0
1000	Chemistry_Mid	Population Health	230	5	87	221	4	115	225	217	2.17391304347826	1.80995475113122	0.829493087557604	0.677534308633386	4.74793763701206	0.144917400966296	0
1001	Chemistry_Mid	Psychology	230	40	694	221	40	746	190	181	17.3913043478261	18.0995475113122	1.04972375690608	0.24655226580421	1.9805986061244	0.556357033881403	0
1002	Optometry_Low	Population Health	81	9	87	107	11	115	72	96	11.1111111111111	10.2803738317757	0.916666666666667	0.475737067691553	3.12055718969089	0.269271712293474	0
1003	Optometry_Low	Psychology	81	16	694	107	21	746	65	86	19.7530864197531	19.6261682242991	0.992005813953488	0.370312800184394	2.5741751420165	0.382287715724983	0
1004	Pharmacy_Low	Psychology	137	27	694	149	43	746	110	106	19.7080291970803	28.8590604026846	1.65269042627533	0.280744941798753	3.4052649428012	0.80210664690756	0
1005	Population Health_Low	Optometry	45	7	213	47	8	337	38	39	15.5555555555556	17.0212765957447	1.11355311355311	0.565520961567167	4.77680724166329	0.259587727528244	0
1006	Population Health_Low	Psychology	45	14	694	47	19	746	31	28	31.1111111111111	40.4255319148936	1.50255102040816	0.438215130508241	4.64396396773481	0.486149243322151	0
1007	Psychology_Low	Optometry	318	7	213	242	5	337	311	237	2.20125786163522	2.06611570247934	0.937311633514165	0.591854700263033	4.30288783836113	0.204177550362459	0
1008	Psychology_Low	Pharmacy	318	15	272	242	16	375	303	226	4.71698113207547	6.61157024793388	1.43008849557522	0.369988885590813	3.70787044499322	0.551570810123152	0
1009	Psychology_Low	Population Health	318	10	87	242	11	115	308	231	3.14465408805031	4.54545454545455	1.46666666666667	0.445516384081269	4.61908642145274	0.465700555226799	0
1010	Optometry_Mid	Food Science	69	5	297	111	12	341	64	99	7.2463768115942	10.8108108108108	1.55151515151515	0.555931059965481	6.4931933414576	0.370726565311347	0
1011	Statistics_Mid	Engineering	310	26	612	161	24	346	284	137	8.38709677419355	14.9068322981366	1.9135317237507	0.301576859128417	4.15998312142516	0.880196758237306	0
1012	Population Health_Mid	Liberal Arts	24	16	3933	23	20	2408	8	3	66.6666666666667	86.9565217391304	3.33333333333333	0.755535130442876	23.3238342102487	0.476384414798696	0
1013	Psychology_Top	Engineering	143	5	612	256	12	346	138	244	3.4965034965035	4.6875	1.35737704918033	0.5428425838129	5.49244686174481	0.335455672129377	0
1014	Psychology_Top	Physics-Maths	143	16	1600	256	18	551	127	238	11.1888111888112	7.03125	0.60031512605042	0.360737095369822	1.51982845360821	0.237117715298304	0
1015	HighSchool_Low	Law	1576	18	92	758	17	78	1558	741	1.14213197969543	2.24274406332454	1.98575498575499	0.341131149495888	4.77986305851416	0.824965655956794	0
1016	AP2_Low	Medical Science	383	8	1800	82	3	2282	375	79	2.088772845953	3.65853658536585	1.78006329113924	0.688228325374727	10.4733806118704	0.30254083546531	0
1017	AP2_Low	Pharmacy	383	4	272	82	NA	NA	379	NA	1.0443864229765	NA	NA	NA	NA	NA	NA
1018	AP2_Low	Population Health	383	1	87	82	NA	NA	382	NA	0.261096605744125	NA	NA	NA	NA	NA	NA
1019	Population Health_Mid	Psychology	24	6	694	23	4	746	18	19	25	17.3913043478261	0.631578947368421	0.724467943507227	4.07949262943511	0.0977797983702296	0
1020	Psychology_Mid	Population Health	233	6	87	248	11	115	227	237	2.57510729613734	4.43548387096774	1.75597749648383	0.515946172775872	6.62988245523064	0.465084711377487	0
1021	AP2_Top	Geography-Geology	305	65	913	83	18	554	240	65	21.3114754098361	21.6867469879518	1.02248520710059	0.300817973185535	2.21852469329101	0.471248303839547	0
1022	Geography-Geology_Top	Engineering	246	32	612	207	19	346	214	188	13.0081300813008	9.17874396135266	0.675864361702128	0.306388030248899	1.48763305986856	0.307060018859345	0
1023	Pharmacy_Top	Geography-Geology	73	4	913	136	8	554	69	128	5.47945205479452	5.88235294117647	1.078125	0.630321547801746	5.46465727435734	0.212703827023021	0
1024	Computer Science_Low	Chinese	1126	9	45	345	2	17	1117	343	0.799289520426288	0.579710144927536	0.723679948169744	0.784169508559133	5.4511709546784	0.0960734256432544	0
1025	Optometry_Top	Statistics	63	3	934	119	4	532	60	115	4.76190476190476	3.36134453781513	0.695652173913043	0.780189497605494	5.18662119309092	0.0933038926603292	0
1026	Liberal Arts_Top	Population Health	1026	24	87	877	53	115	1002	824	2.33918128654971	6.04332953249715	2.68537621359223	0.250491890926621	5.11837729412392	1.4088928959586	1
1027	Optometry_Mid	Population Health	69	4	87	111	11	115	65	100	5.79710144927536	9.90990990990991	1.7875	0.605222030575314	8.49319049604621	0.376202117624398	0
1028	Population Health_Mid	Computer Science	24	6	3166	23	5	1224	18	18	25	21.7391304347826	0.833333333333333	0.691214711777591	4.94094360458647	0.140548951783182	0
1029	Population Health_Mid	Optometry	24	6	213	23	6	337	18	17	25	26.0869565217391	1.05882352941176	0.669113158068688	5.93059648634077	0.189037859685463	0
1030	Psychology_Mid	Sports Science	233	25	130	248	23	117	208	225	10.7296137339056	9.2741935483871	0.850488888888889	0.304516662305533	1.86299698636733	0.38826222233128	0
1031	AP1_Low	Food Science	473	18	297	152	6	341	455	146	3.80549682875264	3.94736842105263	1.03881278538813	0.480904709364046	3.58374425515115	0.301118586108575	0
1032	AP1_Low	Medical Science	473	11	1800	152	13	2282	462	139	2.32558139534884	8.55263157894737	3.92805755395683	0.420940511950307	11.6123229890655	1.32872950241966	1
1033	Finance-Marketing_Low	Pharmacy	374	8	272	102	2	375	366	100	2.13903743315508	1.96078431372549	0.915	0.798581392493688	7.15288571627594	0.117047165746679	0
1034	Geography-Geology_Low	Law	324	6	92	166	2	78	318	164	1.85185185185185	1.20481927710843	0.646341463414634	0.822136777993982	5.36864135301811	0.0778143406979716	0
1035	Law_Low	Biological Science	34	12	2721	25	15	2890	22	10	35.2941176470588	60	2.75	0.543557306504609	11.1480096576074	0.678372214616746	0
1036	Law_Low	Medical Science	34	9	1800	25	11	2282	25	14	26.4705882352941	44	2.18253968253968	0.559864960011585	9.22706914876736	0.516250543813987	0
1037	Law_Low	Pharmacy	34	2	272	25	2	375	32	23	5.88235294117647	8	1.39130434782609	1.03669101513882	20.0799348611784	0.0964010989907251	0
1038	Pharmacy_Low	Law	137	3	92	149	4	78	134	145	2.18978102189781	2.68456375838926	1.23218390804598	0.773105795880897	9.02082284464358	0.168308058964819	0
1039	PLS_Low	Law	734	10	92	976	23	78	724	953	1.36239782016349	2.35655737704918	1.74732423924449	0.381980096709914	4.67245374410063	0.653434397484661	0
1040	Statistics_Mid	Law	310	6	92	161	6	78	304	155	1.93548387096774	3.72670807453416	1.96129032258065	0.585725549998265	8.86265052086384	0.434030397609942	0
1041	Chemistry_Low	Japanese	338	1	53	317	4	32	337	313	0.29585798816568	1.26182965299685	4.30670926517572	1.12078644140146	77.1845407434432	0.240303881011639	0
1042	Chemistry_Low	Law	338	5	92	317	5	78	333	312	1.4792899408284	1.57728706624606	1.06730769230769	0.637344593770223	5.50855110441655	0.206795886698019	0
1043	Computer Science_Top	Japanese	947	10	53	517	6	32	937	511	1.05596620908131	1.1605415860735	1.10019569471624	0.519317677041922	4.19012717981699	0.28887680844213	0
1044	Finance-Marketing_Top	Japanese	297	4	53	178	3	32	293	175	1.34680134680135	1.68539325842697	1.25571428571429	0.769714614861181	9.11316157852499	0.173026490725533	0
1045	Food Science_Low	Japanese	126	1	53	110	1	32	125	109	0.793650793650794	0.909090909090909	1.14678899082569	1.4202726188752	44.4412391780305	0.0295924464259568	0
1046	Food Science_Low	Law	126	3	92	110	2	78	123	108	2.38095238095238	1.81818181818182	0.759259259259259	0.922346287406962	8.16314662303095	0.0706191679988317	0
1047	Japanese_Mid	Biological Science	20	4	2721	11	4	2890	16	7	20	36.3636363636364	2.28571428571429	0.83985542973606	19.8718926716925	0.2629085151693	0
1048	Japanese_Mid	Chemistry	20	2	839	11	1	820	18	10	10	9.09090909090909	0.9	1.28668393770792	24.7258838463107	0.0327591929588741	0
1049	Japanese_Mid	Finance-Marketing	20	6	1009	11	4	413	14	7	30	36.3636363636364	1.33333333333333	0.794325110362489	10.3095353759507	0.172440145258615	0
1050	Japanese_Mid	Food Science	20	1	297	11	NA	NA	19	NA	5	NA	NA	NA	NA	NA	NA
1051	Japanese_Mid	Law	20	1	92	11	1	78	19	10	5	9.09090909090909	1.9	1.46718491641216	83.0842410868423	0.0434498763276506	0
1052	Japanese_Mid	Medical Science	20	2	1800	11	4	2282	18	7	10	36.3636363636364	5.14285714285714	0.97386482553417	63.1372365503093	0.418912531446661	0
1053	Japanese_Mid	Optometry	20	1	213	11	NA	NA	19	NA	5	NA	NA	NA	NA	NA	NA
1054	Japanese_Mid	Pharmacy	20	1	272	11	1	375	19	10	5	9.09090909090909	1.9	1.46718491641216	83.0842410868423	0.0434498763276506	0
1055	Law_Low	Chemistry	34	5	839	25	4	820	29	21	14.7058823529412	16	1.1047619047619	0.729453087072594	7.22806626249347	0.168855517076031	0
1056	Law_Low	Food Science	34	3	297	25	1	341	31	24	8.82352941176471	4	0.430555555555556	1.18627908373878	9.13387222841526	0.0202956732680195	0
1057	Law_Low	Japanese	34	1	53	25	1	32	33	24	2.94117647058824	4	1.375	1.43943381125	55.9800733898267	0.0337731783028278	0
1058	Law_Low	Optometry	34	1	213	25	NA	NA	33	NA	2.94117647058824	NA	NA	NA	NA	NA	NA
1059	Liberal Arts_Mid	Japanese	1287	16	53	767	7	32	1271	760	1.24320124320124	0.91264667535854	0.731661184210526	0.455477457611456	2.36414567069349	0.226436168936797	0
1060	Optometry_Mid	Finance-Marketing	69	4	1009	111	1	413	65	110	5.79710144927536	0.900900900900901	0.147727272727273	1.12892671350957	2.70363950536325	0.00807184059270725	0
1061	Optometry_Mid	Japanese	69	1	53	111	NA	NA	68	NA	1.44927536231884	NA	NA	NA	NA	NA	NA
1062	Optometry_Mid	Law	69	1	92	111	2	78	68	109	1.44927536231884	1.8018018018018	1.24770642201835	1.23445542417681	29.964990616523	0.0519530052743421	0
1063	Pharmacy_Low	Japanese	137	1	53	149	NA	NA	136	NA	0.72992700729927	NA	NA	NA	NA	NA	NA
1064	Biological Science_Mid	Nursing	795	9	14	966	32	58	786	934	1.13207547169811	3.31262939958592	2.99214846538187	0.380399841684664	7.96869923638079	1.12351491420491	1
1065	HighSchool_Top	Nursing	1112	4	14	1087	18	58	1108	1069	0.359712230215827	1.65593376264949	4.66417212347989	0.554430821948428	19.4446062810028	1.11879362755217	1
1066	Medical Science_Mid	Nursing	559	6	14	799	41	58	553	758	1.07334525939177	5.13141426783479	4.98526824978012	0.44066369268053	15.5055220537065	1.60284184151832	1
1067	Nursing_Top	Biological Science	3	3	2721	19	19	2890	0	0	100	100	NA	Inf	NA	NA	NA
1068	Nursing_Top	Medical Science	3	3	1800	19	19	2282	0	0	100	100	NA	Inf	NA	NA	NA
1069	Nursing_Top	Pharmacy	3	2	272	19	13	375	1	6	66.6666666666667	68.4210526315789	1.08333333333333	1.32045058354705	32.4663107796276	0.0361485824206286	0
1070	Pharmacy_Top	Nursing	73	4	14	136	19	58	69	117	5.47945205479452	13.9705882352941	2.80128205128205	0.570676213905543	12.1772376015002	0.6444138964545	0
1071	PLS_Low	Nursing	734	4	14	976	24	58	730	952	0.544959128065395	2.45901639344262	4.60084033613445	0.542297842378552	18.5905969525267	1.138625717757	1
1072	Biological Science_Top	Chemical Materials	952	4	13	981	2	7	948	979	0.420168067226891	0.203873598369011	0.484167517875383	0.867223329241279	4.51667341142476	0.0519006277435639	0
1073	Chemical Materials_Low	Biological Science	6	4	2721	1	1	2890	2	0	66.6666666666667	100	Inf	Inf	Inf	NA	NA
1074	Chemical Materials_Low	Engineering	6	6	612	1	1	346	0	0	100	100	NA	Inf	NA	NA	NA
1075	Chemical Materials_Low	Food Science	6	5	297	1	1	341	1	0	83.3333333333333	100	Inf	Inf	Inf	NA	NA
1076	Chemical Materials_Low	Medical Science	6	4	1800	1	NA	NA	2	NA	66.6666666666667	NA	NA	NA	NA	NA	NA
1077	Engineering_Low	Chemical Materials	186	2	13	134	NA	NA	184	NA	1.0752688172043	NA	NA	NA	NA	NA	NA
1078	HighSchool_Mid	Chemical Materials	1393	4	13	954	NA	NA	1389	NA	0.287150035893754	NA	NA	NA	NA	NA	NA
1079	Medical Science_Top	Chemical Materials	663	4	13	694	NA	NA	659	NA	0.603318250377074	NA	NA	NA	NA	NA	NA
1080	PLS_Mid	Chemical Materials	649	5	13	833	1	7	644	832	0.770416024653313	0.120048019207683	0.154807692307692	1.09670174528355	2.60761332196499	0.00919055804622666	0
1081	Engineering_Low	Optometry	186	2	213	134	NA	NA	184	NA	1.0752688172043	NA	NA	NA	NA	NA	NA
1082	Food Science_Mid	Optometry	91	5	213	130	17	337	86	113	5.49450549450549	13.0769230769231	2.58761061946903	0.52848935080154	10.0905060575874	0.663567186796752	0
1083	Optometry_Top	Engineering	63	1	612	119	1	346	62	118	1.58730158730159	0.840336134453782	0.525423728813559	1.42288566249339	20.4990868551266	0.0134674337813883	0
1084	Optometry_Top	Food Science	63	3	297	119	7	341	60	112	4.76190476190476	5.88235294117647	1.25	0.70836834647358	7.74611977260759	0.201713896230398	0
1085	Food Science_Mid	Geography-Geology	91	13	913	130	18	554	78	112	14.2857142857143	13.8461538461538	0.964285714285714	0.392718368207698	2.65085479984445	0.350772490002121	0
1086	Food Science_Mid	Physics-Maths	91	21	1600	130	9	551	70	121	23.0769230769231	6.92307692307692	0.247933884297521	0.425770285278095	0.742127157395989	0.0828311029588911	1
1087	Psychology_Top	Chemistry	143	23	839	256	50	820	120	206	16.0839160839161	19.53125	1.26635711270578	0.276886191665344	2.58345152956301	0.620743342210793	0
1088	Optometry_Top	Population Health	63	2	87	119	5	115	61	114	3.17460317460317	4.20168067226891	1.33771929824561	0.851566422804183	11.9861244673185	0.149297041406335	0
1089	Psychology_Top	Population Health	143	9	87	256	16	115	134	240	6.29370629370629	6.25	0.992592592592592	0.430395706699012	3.00667244204597	0.327684532938098	0
1090	Finance-Marketing_Mid	Chinese	338	9	45	133	2	17	329	131	2.66272189349112	1.50375939849624	0.558100084817642	0.788532949581171	4.25142991084086	0.0732637515390332	0
1091	Food Science_Low	Population Health	126	4	87	110	3	115	122	107	3.17460317460317	2.72727272727273	0.855140186915888	0.775161821194344	6.2937169573345	0.116189645043752	0
1092	Population Health_Mid	Food Science	24	3	297	23	7	341	21	16	12.5	30.4347826086957	3.0625	0.765708510994571	21.9975479797738	0.42636144076711	0
1093	Surgery_Low	Chemistry	72	1	839	47	2	820	71	45	1.38888888888889	4.25531914893617	3.15555555555556	1.23947841016473	76.7705784768198	0.129705038854229	0
1094	AP2_Mid	Optometry	289	2	213	60	NA	NA	287	NA	0.69204152249135	NA	NA	NA	NA	NA	NA
1095	AP1_Mid	Chinese	422	3	45	93	NA	NA	419	NA	0.710900473933649	NA	NA	NA	NA	NA	NA
1096	Chinese_Mid	Computer Science	16	10	3166	6	5	1224	6	1	62.5	83.3333333333333	3	1.211060141639	67.8359407050785	0.132673033003672	0
1097	Chinese_Mid	Engineering	16	2	612	6	NA	NA	14	NA	12.5	NA	NA	NA	NA	NA	NA
1098	Chinese_Mid	Physics-Maths	16	6	1600	6	2	551	10	4	37.5	33.3333333333333	0.833333333333333	1.00829889748361	11.1791239303896	0.0621197554270465	0
1099	Chinese_Mid	Statistics	16	6	934	6	3	532	10	3	37.5	50	1.66666666666667	0.966091783079296	20.0556711713224	0.138503356683955	0
1100	Computer Science_Top	Chinese	947	9	45	517	5	17	938	512	0.950369588173178	0.967117988394584	1.01779513888889	0.560473312649349	4.30965320989299	0.24036897965894	0
1101	Engineering_Mid	Chinese	244	3	45	79	NA	NA	241	NA	1.22950819672131	NA	NA	NA	NA	NA	NA
1102	Physics-Maths_Mid	Chinese	554	6	45	180	2	17	548	178	1.08303249097473	1.11111111111111	1.02621722846442	0.821041693041836	8.499962974712	0.123897222038532	0
1103	Statistics_Top	Chinese	281	3	45	201	3	17	278	198	1.06761565836299	1.49253731343284	1.4040404040404	0.821775087246705	11.6513835504588	0.169192735578627	0
1104	Optometry_Top	Surgery	63	1	202	119	1	150	62	118	1.58730158730159	0.840336134453782	0.525423728813559	1.42288566249339	20.4990868551266	0.0134674337813883	0
1105	Pharmacy_Top	Surgery	73	1	202	136	3	150	72	133	1.36986301369863	2.20588235294118	1.62406015037594	1.16393342559388	32.5265881033819	0.0810897030963073	0
1106	Surgery_Top	Optometry	56	1	213	60	1	337	55	59	1.78571428571429	1.66666666666667	0.932203389830508	1.4265801662452	36.7169928893805	0.0236676016096849	0
1107	Surgery_Top	Pharmacy	56	1	272	60	2	375	55	58	1.78571428571429	3.33333333333333	1.89655172413793	1.23912194617486	46.0983135381206	0.0780268987358101	0
1108	Computer Science_Low	Optometry	1126	6	213	345	4	337	1120	341	0.532859680284192	1.15942028985507	2.18963831867058	0.648453602911706	11.6290282362254	0.412288616830012	0
1109	Geography-Geology_Top	Optometry	246	5	213	207	12	337	241	195	2.03252032520325	5.79710144927536	2.96615384615385	0.54093522352949	11.9433461153403	0.736650228008787	0
1110	Optometry_Low	Geography-Geology	81	4	913	107	9	554	77	98	4.93827160493827	8.41121495327103	1.76785714285714	0.619921128637166	8.72388848444456	0.35824837549491	0
1111	Population Health_Mid	Geography-Geology	24	2	913	23	4	554	22	19	8.33333333333333	17.3913043478261	2.31578947368421	0.920915916032465	24.8065849110992	0.216187794718453	0
1112	Pharmacy_Mid	Physics-Maths	62	6	1600	90	3	551	56	87	9.67741935483871	3.33333333333333	0.32183908045977	0.727565389316112	2.0954687366863	0.0494306557276482	0
1113	Population Health_Top	Psychology	18	5	694	45	15	746	13	30	27.7777777777778	33.3333333333333	1.3	0.61394061351492	6.31710696257219	0.267527526447307	0
1114	Biological Science_Low	Ancient History	974	21	76	943	25	72	953	918	2.15605749486653	2.65111346765642	1.23586471625687	0.299595878111033	2.67307711491066	0.57138703121168	0
1115	Medical Science_Low	Ancient History	578	5	76	789	9	72	573	780	0.865051903114187	1.14068441064639	1.32230769230769	0.560480475209657	5.59915495576443	0.312278843316523	0
1116	PLS_Low	Ancient History	734	5	76	976	17	72	729	959	0.681198910081744	1.74180327868852	2.58456725755996	0.51111449244941	9.63765581954159	0.693113349753211	0
1117	Sports Science_Mid	Medical Science	47	19	1800	40	31	2282	28	9	40.4255319148936	77.5	5.07602339181286	0.481367884563246	17.5323976013667	1.46962292665681	1
1118	PLS_Top	Finance-Marketing	578	25	1009	478	21	413	553	457	4.32525951557093	4.39330543933054	1.01645514223195	0.302680606730101	2.21604435795712	0.46622760616679	0
1119	Japanese_Low	Physics-Maths	17	5	1600	12	4	551	12	8	29.4117647058824	33.3333333333333	1.2	0.811377429642539	9.69507900903491	0.148528959759694	0
1120	Japanese_Low	Statistics	17	7	934	12	4	532	10	8	41.1764705882353	33.3333333333333	0.714285714285714	0.786038893984988	5.40637014817036	0.09437091202594	0
1121	Statistics_Top	Japanese	281	4	53	201	1	32	277	200	1.42348754448399	0.497512437810945	0.34625	1.12187793823715	6.22293381185816	0.0192656817707983	0
1122	Food Science_Mid	Pharmacy	91	4	272	130	6	375	87	124	4.3956043956044	4.61538461538462	1.05241935483871	0.660473644946763	5.76503541551037	0.192121369360412	0
1123	Pharmacy_Top	Food Science	73	4	297	136	6	341	69	130	5.47945205479452	4.41176470588235	0.796153846153846	0.662458850029315	4.38359297076376	0.144598495109623	0
1124	AP1_Low	Pharmacy	473	5	272	152	4	375	468	148	1.05708245243129	2.63157894736842	2.52972972972973	0.677416791121617	14.4755454936825	0.442092666440195	0
1125	Engineering_Top	Surgery	182	1	202	133	NA	NA	181	NA	0.549450549450549	NA	NA	NA	NA	NA	NA
1126	Surgery_Mid	Engineering	74	1	612	43	NA	NA	73	NA	1.35135135135135	NA	NA	NA	NA	NA	NA
1127	Psychology_Mid	Engineering	233	18	612	248	6	346	215	242	7.72532188841202	2.41935483870968	0.296143250688705	0.480630436424784	1.02092735630476	0.0859031001440747	0
1128	Engineering_Low	Population Health	186	1	87	134	NA	NA	185	NA	0.537634408602151	NA	NA	NA	NA	NA	NA
1129	Physics-Maths_Mid	Population Health	554	3	87	180	1	115	551	179	0.541516245487365	0.555555555555556	1.02607076350093	1.15790103529826	20.2333428660625	0.0520339727686465	0
1130	Population Health_Low	Engineering	45	2	612	47	2	346	43	45	4.44444444444444	4.25531914893617	0.955555555555555	1.02248620341583	13.2956857076268	0.0686753913887505	0
1131	Chinese_Low	Engineering	18	3	612	4	NA	NA	15	NA	16.6666666666667	NA	NA	NA	NA	NA	NA
1132	Engineering_Low	Chinese	186	1	45	134	NA	NA	185	NA	0.537634408602151	NA	NA	NA	NA	NA	NA
1133	Population Health_Low	Food Science	45	7	297	47	10	341	38	37	15.5555555555556	21.2765957446809	1.46718146718147	0.544242555629247	5.95819612554469	0.36128744544205	0
1134	Sports Science_Mid	Food Science	47	6	297	40	10	341	41	30	12.7659574468085	25	2.27777777777778	0.569552669998517	9.87294743061109	0.525503821569234	0
1135	AP1_Mid	Sports Science	422	5	130	93	NA	NA	417	NA	1.18483412322275	NA	NA	NA	NA	NA	NA
1136	Finance-Marketing_Top	Chinese	297	3	45	178	1	17	294	177	1.01010101010101	0.561797752808989	0.553672316384181	1.15861314138572	10.9380395982609	0.0280263232891353	0
1137	Ancient History_Low	Biological Science	35	18	2721	22	15	2890	17	7	51.4285714285714	68.1818181818182	2.02380952380952	0.569124673943355	8.76246864126255	0.467425922573343	0
1138	Ancient History_Low	Geography-Geology	35	10	913	22	11	554	25	11	28.5714285714286	50	2.5	0.567290209520825	10.7732156504513	0.58014247582041	0
1139	Ancient History_Low	Physics-Maths	35	9	1600	22	2	551	26	20	25.7142857142857	9.09090909090909	0.288888888888889	0.836404596814634	2.48936760540999	0.0335252977270554	0
1140	AP1_Low	Ancient History	473	12	76	152	5	72	461	147	2.5369978858351	3.28947368421053	1.30668934240363	0.540652616583636	5.25761344741259	0.324755148819756	0
1141	AP2_Low	Ancient History	383	5	76	82	4	72	378	78	1.30548302872063	4.8780487804878	3.87692307692308	0.682250698399068	22.4622779342105	0.669145515356967	0
1142	Geography-Geology_Mid	Ancient History	343	10	76	181	5	72	333	176	2.91545189504373	2.76243093922652	0.946022727272727	0.555594115505934	3.95573396023041	0.226243475803515	0
1143	HighSchool_Low	Ancient History	1576	30	76	758	23	72	1546	735	1.90355329949239	3.03430079155673	1.61260770975057	0.28074716196426	3.32269601552056	0.782648672463512	0
1144	Physics-Maths_Low	Ancient History	565	9	76	160	4	72	556	156	1.5929203539823	2.5	1.58404558404558	0.607716980733998	7.57499958170343	0.331247597477762	0
1145	Chinese_Low	Japanese	18	2	53	4	1	32	16	3	11.1111111111111	25	2.66666666666667	1.37689263682153	92.4185570933887	0.0769446238370217	0
1146	Finance-Marketing_Mid	Japanese	338	6	53	133	4	32	332	129	1.77514792899408	3.00751879699248	1.71576227390181	0.65378180828464	9.23818661660911	0.318659960305635	0
1147	Japanese_Mid	Chinese	20	3	45	11	1	17	17	10	15	9.09090909090909	0.566666666666667	1.22153872748476	13.163899356158	0.0243933125302191	0
1148	Geography-Geology_Mid	Sports Science	343	11	130	181	15	117	332	166	3.2069970845481	8.28729281767956	2.72727272727273	0.408181212397228	7.80191121142164	0.953358264066976	0
1149	Ancient History_Low	Finance-Marketing	35	4	1009	22	3	413	31	19	11.4285714285714	13.6363636363636	1.22368421052632	0.817449066790605	10.0422129151534	0.149110864282899	0
1150	Ancient History_Low	Psychology	35	8	694	22	11	746	27	11	22.8571428571429	50	3.375	0.586391694053743	15.2770841326459	0.745602033810832	0
1151	AP1_Mid	Ancient History	422	3	76	93	1	72	419	92	0.710900473933649	1.0752688172043	1.51811594202899	1.16042644462956	30.1314099959853	0.0764874930761497	0
1152	AP2_Mid	Ancient History	289	4	76	60	2	72	285	58	1.3840830449827	3.33333333333333	2.45689655172414	0.8779237730237	23.5600552698205	0.256210802425674	0
1153	Finance-Marketing_Low	Ancient History	374	4	76	102	4	72	370	98	1.06951871657754	3.92156862745098	3.77551020408163	0.716175107313397	23.87152744121	0.597133021178891	0
1154	Geography-Geology_Top	Ancient History	246	8	76	207	8	72	238	199	3.2520325203252	3.86473429951691	1.19597989949749	0.509143208047019	4.4371381582236	0.322362718715674	0
1155	Liberal Arts_Mid	Ancient History	1287	21	76	767	23	72	1266	744	1.63170163170163	2.9986962190352	1.8636712749616	0.305337983103315	4.09101723795791	0.848999263286098	0
1156	Physics-Maths_Mid	Ancient History	554	7	76	180	1	72	547	179	1.26353790613718	0.555555555555556	0.436552274541101	1.07250729069821	6.9092363717607	0.0275830610146637	0
1157	Psychology_Mid	Ancient History	233	7	76	248	11	72	226	237	3.00429184549356	4.43548387096774	1.49849306811332	0.492351928817179	5.3242198753668	0.421748449115088	0
1158	Law_Top	Geography-Geology	21	7	913	24	6	554	14	18	33.3333333333333	25	0.666666666666667	0.66068747264341	3.65393669862601	0.121634412717541	0
1159	Ancient History_Mid	Biological Science	24	17	2721	21	18	2890	7	3	70.8333333333333	85.7142857142857	2.47058823529412	0.768485238087106	17.8732603774265	0.341504912896735	0
1160	Ancient History_Mid	Geography-Geology	24	10	913	21	8	554	14	13	41.6666666666667	38.0952380952381	0.861538461538462	0.61102507996943	4.15517274128951	0.178632409992108	0
1161	Ancient History_Mid	Medical Science	24	4	1800	21	5	2282	20	16	16.6666666666667	23.8095238095238	1.5625	0.75	10.7783242407133	0.226510744664555	0
1162	Biological Science_Mid	Ancient History	795	14	76	966	21	72	781	945	1.76100628930818	2.17391304347826	1.23968253968254	0.34840526666073	3.04042981551179	0.50545906087132	0
1163	Ancient History_Low	Statistics	35	8	934	22	3	532	27	19	22.8571428571429	13.6363636363636	0.532894736842105	0.740271537557496	3.58503358796903	0.0792117545305602	0
1164	Finance-Marketing_Mid	Ancient History	338	3	76	133	2	72	335	131	0.887573964497041	1.50375939849624	1.70483460559796	0.918668599521317	18.15670191888	0.160076485555018	0
1165	Statistics_Low	Ancient History	343	8	76	170	3	72	335	167	2.33236151603499	1.76470588235294	0.752245508982036	0.683598150898826	4.3735398037689	0.129385653537668	0
1166	Geography-Geology_Mid	Optometry	343	2	213	181	4	337	341	177	0.583090379008746	2.20994475138122	3.85310734463277	0.870966284556281	36.2927540356363	0.409074389744165	0
1167	Statistics_Low	Optometry	343	4	213	170	2	337	339	168	1.16618075801749	1.17647058823529	1.00892857142857	0.871149948894997	9.50768164253771	0.107064676807289	0
1168	Chemical Materials_Low	Computer Science	6	2	3166	1	NA	NA	4	NA	33.3333333333333	NA	NA	NA	NA	NA	NA
1169	Chemical Materials_Low	Finance-Marketing	6	1	1009	1	NA	NA	5	NA	16.6666666666667	NA	NA	NA	NA	NA	NA
1170	Chemical Materials_Low	Physics-Maths	6	2	1600	1	NA	NA	4	NA	33.3333333333333	NA	NA	NA	NA	NA	NA
1171	Chemical Materials_Low	Psychology	6	2	694	1	NA	NA	4	NA	33.3333333333333	NA	NA	NA	NA	NA	NA
1172	Chemical Materials_Low	Statistics	6	1	934	1	NA	NA	5	NA	16.6666666666667	NA	NA	NA	NA	NA	NA
1173	Computer Science_Mid	Chemical Materials	1093	2	13	362	NA	NA	1091	NA	0.182982616651418	NA	NA	NA	NA	NA	NA
1174	Engineering_Mid	Chemical Materials	244	5	13	79	3	7	239	76	2.04918032786885	3.79746835443038	1.88684210526316	0.742075015405172	12.7527604308037	0.279168823841031	0
1175	Finance-Marketing_Top	Chemical Materials	297	1	13	178	NA	NA	296	NA	0.336700336700337	NA	NA	NA	NA	NA	NA
1176	Food Science_Mid	Chemical Materials	91	2	13	130	2	7	89	128	2.1978021978022	1.53846153846154	0.6953125	1.00947929897357	9.35597616045161	0.0516738675222227	0
1177	Medical Science_Low	Chemical Materials	578	2	13	789	NA	NA	576	NA	0.346020761245675	NA	NA	NA	NA	NA	NA
1178	Physics-Maths_Mid	Chemical Materials	554	2	13	180	1	7	552	179	0.36101083032491	0.555555555555556	1.54189944134078	1.22776145337019	36.3975258909806	0.0653191069724922	0
1179	Psychology_Mid	Chemical Materials	233	2	13	248	NA	NA	231	NA	0.858369098712446	NA	NA	NA	NA	NA	NA
1180	Statistics_Mid	Chemical Materials	310	1	13	161	NA	NA	309	NA	0.32258064516129	NA	NA	NA	NA	NA	NA
1181	AP2_Top	PLS	305	13	1953	83	4	2274	292	79	4.26229508196721	4.81927710843374	1.13729308666018	0.58566710877889	5.13841033643542	0.251719010409414	0
1182	Computer Science_Low	Law	1126	13	92	345	8	78	1113	337	1.15452930728242	2.31884057971015	2.0324126911664	0.453639624118207	6.53613254938586	0.631979433709981	0
1183	Biological Science_Low	Chemical Materials	974	1	13	943	1	7	973	942	0.102669404517454	0.106044538706257	1.03290870488323	1.41495205585011	39.4834008296357	0.0270214918220201	0
1184	Chemical Materials_Low	Chemistry	6	2	839	1	1	820	4	0	33.3333333333333	100	Inf	Inf	Inf	NA	NA
1185	Chemical Materials_Low	Liberal Arts	6	3	3933	1	1	2408	3	0	50	100	Inf	Inf	Inf	NA	NA
1186	Chemistry_Mid	Chemical Materials	230	1	13	221	1	7	229	220	0.434782608695652	0.452488687782805	1.04090909090909	1.41736102203092	40.0368023124525	0.0270623944210499	0
1187	Food Science_Top	Psychology	80	7	694	101	19	746	73	82	8.75	18.8118811881188	2.41637630662021	0.470512990142373	8.11602070920409	0.719425770879794	0
1188	Liberal Arts_Low	Chemical Materials	1620	3	13	764	NA	NA	1617	NA	0.185185185185185	NA	NA	NA	NA	NA	NA
1189	Ancient History_Top	Finance-Marketing	17	3	1009	29	NA	NA	14	NA	17.6470588235294	NA	NA	NA	NA	NA	NA
1190	Law_Top	Surgery	21	2	202	24	NA	NA	19	NA	9.52380952380952	NA	NA	NA	NA	NA	NA
1191	Surgery_Low	Law	72	1	92	47	NA	NA	71	NA	1.38888888888889	NA	NA	NA	NA	NA	NA
1192	Chinese_Top	Pharmacy	11	2	272	7	2	375	9	5	18.1818181818182	28.5714285714286	1.8	1.14503760248784	34.3382018617903	0.0943555522517123	0
1193	Ancient History_Top	Statistics	17	3	934	29	1	532	14	28	17.6470588235294	3.44827586206897	0.166666666666667	1.20019839629796	3.66471804737162	0.00757978578944165	0
1194	Finance-Marketing_Top	Ancient History	297	3	76	178	NA	NA	294	NA	1.01010101010101	NA	NA	NA	NA	NA	NA
1195	Finance-Marketing_Top	Population Health	297	5	87	178	4	115	292	174	1.68350168350168	2.24719101123596	1.34252873563218	0.677622154279971	7.68624216560095	0.234494746218711	0
1196	HighSchool_Mid	Ancient History	1393	15	76	954	29	72	1378	925	1.07681263460158	3.0398322851153	2.88014414414414	0.320867878999086	6.58026574544925	1.26062238394925	1
1197	Medical Science_Mid	Ancient History	559	4	76	799	7	72	555	792	0.715563506261181	0.876095118898623	1.22632575757576	0.629222989822822	6.19827922182371	0.242627801987158	0
1198	Population Health_Top	Ancient History	18	1	76	45	1	72	17	44	5.55555555555556	2.22222222222222	0.386363636363636	1.44275805391585	15.8651629968335	0.00940909712266593	0
1199	Population Health_Top	Finance-Marketing	18	3	1009	45	1	413	15	44	16.6666666666667	2.22222222222222	0.113636363636364	1.192781318066	2.45140216363324	0.00526768856292314	0
1200	Statistics_Top	Population Health	281	4	87	201	5	115	277	196	1.42348754448399	2.48756218905473	1.76658163265306	0.677282916601014	10.1051976321178	0.308832224607676	0
1201	Law_Mid	Psychology	37	10	694	29	18	746	27	11	27.027027027027	62.0689655172414	4.41818181818182	0.532448761386186	17.4054577125108	1.12150630571935	1
1202	Psychology_Mid	Optometry	233	11	213	248	12	337	222	236	4.72103004291846	4.83870967741935	1.02619414483821	0.427766544837861	3.08748179874621	0.34107874686998	0
1203	Japanese_Top	Computer Science	16	14	3166	9	4	1224	2	5	87.5	44.4444444444444	0.114285714285714	1.01065749461851	1.54247666442785	0.00846769665370638	0
1204	Japanese_Top	Finance-Marketing	16	4	1009	9	2	413	12	7	25	22.2222222222222	0.857142857142857	0.988023520059354	10.9136018161024	0.0673191023395246	0
1205	Japanese_Top	Physics-Maths	16	7	1600	9	1	551	9	8	43.75	11.1111111111111	0.160714285714286	1.17429479006264	3.30581146953017	0.00781323492604493	0
1206	Physics-Maths_Low	Japanese	565	5	53	160	4	32	560	156	0.884955752212389	2.5	2.87179487179487	0.676901743753088	16.4111210091235	0.502537625618776	0
1207	PLS_Low	Japanese	734	7	53	976	2	32	727	974	0.953678474114441	0.204918032786885	0.21325902024054	0.803280369933655	1.6874173385044	0.0269520815486372	0
1208	Finance-Marketing_Mid	Optometry	338	6	213	133	2	337	332	131	1.77514792899408	1.50375939849624	0.844783715012723	0.822989855736811	7.03237323461712	0.10148203193165	0
1209	Optometry_Low	Physics-Maths	81	6	1600	107	3	551	75	104	7.40740740740741	2.80373831775701	0.360576923076923	0.723151932825128	2.3211581433973	0.0560132957013119	0
1210	Physics-Maths_Mid	Optometry	554	6	213	180	NA	NA	548	NA	1.08303249097473	NA	NA	NA	NA	NA	NA
1211	Statistics_Mid	Optometry	310	6	213	161	8	337	304	153	1.93548387096774	4.96894409937888	2.64923747276688	0.549082951896428	10.893436518473	0.644283296204136	0
1212	Engineering_Top	Psychology	182	8	694	133	11	746	174	122	4.3956043956044	8.27067669172932	1.96106557377049	0.479429805766546	6.7397291283779	0.570613167291098	0
1213	Statistics_Low	Japanese	343	5	53	170	6	32	338	164	1.45772594752187	3.52941176470588	2.47317073170732	0.612962321455351	11.9876745631351	0.510238531748569	0
1214	AP2_Low	Chinese	383	2	45	82	NA	NA	381	NA	0.522193211488251	NA	NA	NA	NA	NA	NA
1215	Finance-Marketing_Low	Population Health	374	2	87	102	1	115	372	101	0.53475935828877	0.980392156862745	1.84158415841584	1.22987363665623	43.7088575398451	0.077591417470396	0
1216	Population Health_Low	Sports Science	45	9	130	47	9	117	36	38	20	19.1489361702128	0.947368421052632	0.525657483037847	3.66746540286494	0.244721306575011	0
1217	Sports Science_Low	Population Health	54	5	87	45	6	115	49	39	9.25925925925926	13.3333333333333	1.50769230769231	0.642429650290986	7.88400921627327	0.288322353807325	0
1218	Engineering_Top	Chinese	182	1	45	133	NA	NA	181	NA	0.549450549450549	NA	NA	NA	NA	NA	NA
1219	Medical Science_Top	Chinese	663	1	45	694	1	17	662	693	0.150829562594268	0.144092219020173	0.955266955266955	1.41525742374351	36.5442342058785	0.0249706958061857	0
1220	PLS_Top	Chinese	578	1	45	478	NA	NA	577	NA	0.173010380622837	NA	NA	NA	NA	NA	NA
1221	Chemical Materials_Top	Biological Science	5	1	2721	1	NA	NA	4	NA	20	NA	NA	NA	NA	NA	NA
1222	Chemical Materials_Top	Medical Science	5	1	1800	1	NA	NA	4	NA	20	NA	NA	NA	NA	NA	NA
1223	PLS_Low	Chinese	734	9	45	976	4	17	725	972	1.22615803814714	0.409836065573771	0.331504343850023	0.602925557627391	1.56583455692462	0.0701831042784454	0
1224	Geography-Geology_Low	Optometry	324	1	213	166	2	337	323	164	0.308641975308642	1.20481927710843	3.9390243902439	1.22849238345535	93.1583714227701	0.166554147630192	0
1225	Optometry_Mid	Geography-Geology	69	2	913	111	5	554	67	106	2.89855072463768	4.5045045045045	1.58018867924528	0.851093023939498	14.1414300975838	0.176573107867046	0
1226	Chemistry_Top	Sports Science	271	7	130	282	5	117	264	277	2.5830258302583	1.77304964539007	0.680763280041258	0.591823563191151	3.12490860248226	0.148304703402974	0
1227	Finance-Marketing_Mid	Sports Science	338	7	130	133	4	117	331	129	2.07100591715976	3.00751879699248	1.46622369878184	0.635318997730977	7.52805420145	0.285573386872721	0
1228	Optometry_Low	Sports Science	81	5	130	107	6	117	76	101	6.17283950617284	5.60747663551402	0.902970297029703	0.624280026512557	4.50620550756983	0.180940562064518	0
1229	Sports Science_Mid	Finance-Marketing	47	10	1009	40	7	413	37	33	21.2765957446809	17.5	0.784848484848485	0.547893420463506	3.21735941262139	0.191457361509723	0
1230	Sports Science_Mid	Optometry	47	3	213	40	4	337	44	36	6.38297872340426	10	1.62962962962963	0.796139676086039	12.6595571244789	0.209777696301215	0
1231	Ancient History_Low	Medical Science	35	2	1800	22	2	2282	33	20	5.71428571428571	9.09090909090909	1.65	1.03937626983832	23.9787778460054	0.11353789661359	0
1232	AP2_Mid	Sports Science	289	2	130	60	NA	NA	287	NA	0.69204152249135	NA	NA	NA	NA	NA	NA
1233	Sports Science_Mid	Physics-Maths	47	9	1600	40	3	551	38	37	19.1489361702128	7.5	0.342342342342342	0.705540403481725	2.10606756928813	0.0556479198813434	0
1234	AP1_Low	Law	473	2	92	152	4	78	471	148	0.422832980972516	2.63157894736842	6.36486486486486	0.871137129852291	59.9775970610598	0.675443944624002	0
1235	AP2_Low	Law	383	2	92	82	2	78	381	80	0.522193211488251	2.4390243902439	4.7625	1.00753395571366	63.7629739590368	0.355714372177358	0
1236	AP1_Mid	Pharmacy	422	3	272	93	2	375	419	91	0.710900473933649	2.1505376344086	3.06959706959707	0.920167908138082	32.8180499949703	0.287111091948578	0
1237	AP1_Mid	Population Health	422	1	87	93	NA	NA	421	NA	0.23696682464455	NA	NA	NA	NA	NA	NA
1238	Population Health_Mid	Finance-Marketing	24	5	1009	23	1	413	19	22	20.8333333333333	4.34782608695652	0.172727272727273	1.13933582599772	3.24705478448729	0.00918823756418773	0
1239	Pharmacy_Mid	Sports Science	62	3	130	90	5	117	59	85	4.83870967741935	5.55555555555556	1.15686274509804	0.74969806706304	7.97398472908345	0.167837217710549	0
1240	Population Health_Mid	Sports Science	24	2	130	23	4	117	22	19	8.33333333333333	17.3913043478261	2.31578947368421	0.920915916032465	24.8065849110992	0.216187794718453	0
1241	Sports Science_Low	Pharmacy	54	4	272	45	5	375	50	40	7.40740740740741	11.1111111111111	1.5625	0.703562363973514	9.56356140754319	0.25528212200053	0
1242	Geography-Geology_Low	Population Health	324	6	87	166	6	115	318	160	1.85185185185185	3.6144578313253	1.9875	0.585429745931468	8.97424818627676	0.440165701684125	0
1243	Food Science_Mid	Law	91	2	92	130	2	78	89	128	2.1978021978022	1.53846153846154	0.6953125	1.00947929897357	9.35597616045161	0.0516738675222227	0
1244	Law_Low	Engineering	34	4	612	25	4	346	30	21	11.7647058823529	16	1.42857142857143	0.762202322846356	10.1690208308019	0.200689561019384	0
1245	Physics-Maths_Top	Japanese	481	4	53	211	1	32	477	210	0.831600831600832	0.4739336492891	0.567857142857143	1.12109693640675	10.1852358936423	0.031659721783681	0
1246	Statistics_Mid	Japanese	310	4	53	161	3	32	306	158	1.29032258064516	1.86335403726708	1.45253164556962	0.770019753716483	10.5498206765434	0.199989008919579	0
1247	AP2_Low	Sports Science	383	2	130	82	1	117	381	81	0.522193211488251	1.21951219512195	2.35185185185185	1.23084131833813	55.9590086671812	0.0988439085108905	0
1248	Pharmacy_Low	Sports Science	137	5	130	149	6	117	132	143	3.64963503649635	4.02684563758389	1.10769230769231	0.617442654208009	5.4313823811328	0.225906070024258	0
1249	Engineering_Top	Pharmacy	182	2	272	133	1	375	180	132	1.0989010989011	0.75187969924812	0.681818181818182	1.23009402613431	16.1917178072255	0.0287107296824555	0
1250	Food Science_Top	Pharmacy	80	5	272	101	7	375	75	94	6.25	6.93069306930693	1.11702127659574	0.605663911804902	5.31349675321089	0.234823994502978	0
1251	Pharmacy_Top	Engineering	73	3	612	136	2	346	70	134	4.10958904109589	1.47058823529412	0.348258706467662	0.924706296175284	3.76711345595737	0.0321955067317467	0
1252	Food Science_Mid	Population Health	91	3	87	130	16	115	88	114	3.2967032967033	12.3076923076923	4.11695906432749	0.644956509790801	21.6688947892402	0.782197343344182	0
1253	Law_Mid	Food Science	37	2	297	29	3	341	35	26	5.40540540540541	10.3448275862069	2.01923076923077	0.948876335655127	23.2446081099326	0.175408115298189	0
1254	Law_Mid	Optometry	37	2	213	29	2	337	35	27	5.40540540540541	6.89655172413793	1.2962962962963	1.03228313248278	18.4975864540151	0.090843423922841	0
1255	Law_Mid	Population Health	37	2	87	29	1	115	35	28	5.40540540540541	3.44827586206897	0.625	1.25071408174919	15.6517875554411	0.0249572132650245	0
1256	Optometry_Low	Law	81	2	92	107	2	78	79	105	2.46913580246914	1.86915887850467	0.752380952380952	1.01103018618235	10.1643879293826	0.0556921972516702	0
1257	Pharmacy_Mid	Food Science	62	1	297	90	NA	NA	61	NA	1.61290322580645	NA	NA	NA	NA	NA	NA
1258	Pharmacy_Mid	Law	62	2	92	90	1	78	60	89	3.2258064516129	1.11111111111111	0.337078651685393	1.23608358201331	8.12931151615713	0.0139768315184154	0
1259	Population Health_Low	Law	45	2	92	47	2	78	43	45	4.44444444444444	4.25531914893617	0.955555555555555	1.02248620341583	13.2956857076268	0.0686753913887505	0
1260	Psychology_Top	Food Science	143	5	297	256	23	341	138	233	3.4965034965035	8.984375	2.7244635193133	0.50499156742932	10.0003972901218	0.742240658318746	0
1261	Optometry_Mid	Physics-Maths	69	3	1600	111	NA	NA	66	NA	4.34782608695652	NA	NA	NA	NA	NA	NA
1262	Engineering_Low	Pharmacy	186	2	272	134	5	375	184	129	1.0752688172043	3.73134328358209	3.56589147286822	0.844503831011554	31.3750016479491	0.405277492538568	0
1263	Pharmacy_Low	Engineering	137	4	612	149	6	346	133	143	2.91970802919708	4.02684563758389	1.39510489510489	0.656641813054998	7.56719361911117	0.257204687274045	0
1264	Finance-Marketing_Mid	Law	338	10	92	133	8	78	328	125	2.9585798816568	6.01503759398496	2.0992	0.485848515988065	7.33469807444989	0.600793733466732	0
1265	Ancient History_Mid	Physics-Maths	24	4	1600	21	2	551	20	19	16.6666666666667	9.52380952380952	0.526315789473684	0.923380516876639	5.67375380139341	0.0488227582559675	0
1266	Ancient History_Top	Geography-Geology	17	3	913	29	6	554	14	23	17.6470588235294	20.6896551724138	1.21739130434783	0.7841599532609	9.16986142056378	0.161620936231181	0
1267	Optometry_Top	Geography-Geology	63	2	913	119	4	554	61	115	3.17460317460317	3.36134453781513	1.06086956521739	0.880391444072955	10.2379037307211	0.109929167533329	0
1268	AP1_Low	Japanese	473	2	53	152	2	32	471	150	0.422832980972516	1.31578947368421	3.14	1.00438528907845	41.7005750674987	0.236437986383659	0
1269	Geography-Geology_Mid	Japanese	343	2	53	181	3	32	341	178	0.583090379008746	1.65745856353591	2.87359550561798	0.917542294491688	30.5155211218976	0.270601675027018	0
1270	Finance-Marketing_Low	Optometry	374	2	213	102	2	337	372	100	0.53475935828877	1.96078431372549	3.72	1.00632408897085	49.6504869146653	0.278716299878069	0
1271	Law_Mid	Engineering	37	2	612	29	1	346	35	28	5.40540540540541	3.44827586206897	0.625	1.25071408174919	15.6517875554411	0.0249572132650245	0
1272	Law_Mid	Finance-Marketing	37	10	1009	29	6	413	27	23	27.027027027027	20.6896551724138	0.704347826086956	0.589221490250711	3.21157786693784	0.154474180813323	0
1273	Law_Mid	Geography-Geology	37	11	913	29	4	554	26	25	29.7297297297297	13.7931034482759	0.378181818181818	0.64758831781513	2.00402913161053	0.0713669703435735	0
1274	Biological Science_Mid	Chemical Materials	795	2	13	966	2	7	793	964	0.251572327044025	0.20703933747412	0.822614107883817	1.00114852966294	10.8340005814679	0.0624602117565885	0
1275	Chemical Materials_Mid	Biological Science	2	2	2721	5	4	2890	0	1	100	80	0	Inf	NA	0	NA
1276	Chemical Materials_Mid	Engineering	2	2	612	5	5	346	0	0	100	100	NA	Inf	NA	NA	NA
1277	Chemical Materials_Mid	Food Science	2	2	297	5	4	341	0	1	100	80	0	Inf	NA	0	NA
1278	Chemical Materials_Mid	Liberal Arts	2	1	3933	5	3	2408	1	2	50	60	1.5	1.68325082306035	114.415433434254	0.0196651791848773	0
1279	Chemical Materials_Mid	Medical Science	2	2	1800	5	2	2282	0	3	100	40	0	Inf	NA	0	NA
1280	Food Science_Low	Chemical Materials	126	1	13	110	2	7	125	108	0.793650793650794	1.81818181818182	2.31481481481481	1.23177078194738	55.2097437133774	0.0970547455301409	0
1281	Medical Science_Mid	Chemical Materials	559	1	13	799	2	7	558	797	0.178890876565295	0.250312891113892	1.40025094102886	1.22598809938744	32.9032296982629	0.059589976905997	0
1282	Engineering_Mid	Optometry	244	2	213	79	2	337	242	77	0.819672131147541	2.53164556962025	3.14285714285714	1.00852329888405	42.1856366317941	0.234144884587655	0
1283	Optometry_Low	Engineering	81	1	612	107	NA	NA	80	NA	1.23456790123457	NA	NA	NA	NA	NA	NA
1284	Engineering_Mid	Japanese	244	1	53	79	NA	NA	243	NA	0.409836065573771	NA	NA	NA	NA	NA	NA
1285	Japanese_Low	Engineering	17	1	612	12	NA	NA	16	NA	5.88235294117647	NA	NA	NA	NA	NA	NA
1286	Law_Mid	Statistics	37	9	934	29	8	532	28	21	24.3243243243243	27.5862068965517	1.18518518518519	0.565194165260439	5.07981077733746	0.276518946227104	0
1287	Psychology_Low	Ancient History	318	6	76	242	11	72	312	231	1.88679245283019	4.54545454545455	2.47619047619048	0.514888230696614	9.32369001691536	0.657627963097486	0
1288	Sports Science_Mid	Pharmacy	47	4	272	40	4	375	43	36	8.51063829787234	10	1.19444444444444	0.742316369030932	8.07801220062362	0.176614926473379	0
1289	Sports Science_Mid	Population Health	47	3	87	40	5	115	44	35	6.38297872340426	12.5	2.0952380952381	0.764612342714944	15.0074084926774	0.292523701069308	0
1290	Law_Top	Physics-Maths	21	6	1600	24	6	551	15	18	28.5714285714286	25	0.833333333333333	0.674948557710553	4.73826473639002	0.146560921155606	0
1291	Food Science_Top	Population Health	80	5	87	101	13	115	75	88	6.25	12.8712871287129	2.21590909090909	0.549199459777635	9.1143614699688	0.538738025187228	0
1292	Population Health_Top	Food Science	18	2	297	45	15	341	16	30	11.1111111111111	33.3333333333333	4	0.813941029804985	32.530968510019	0.491839030094424	0
1293	AP2_Mid	Japanese	289	1	53	60	1	32	288	59	0.346020761245675	1.66666666666667	4.88135593220339	1.42141527175016	189.723426369875	0.125591426387188	0
1294	Optometry_Mid	Statistics	69	1	934	111	3	532	68	108	1.44927536231884	2.7027027027027	1.88888888888889	1.16503153388461	37.9376858051717	0.0940463594139821	0
1295	Geography-Geology_Mid	Law	343	6	92	181	3	78	337	178	1.74927113702624	1.65745856353591	0.946629213483146	0.713151692544114	5.93886363480695	0.150888608145125	0
1296	AP1_Top	Sports Science	438	4	130	130	1	117	434	129	0.91324200913242	0.769230769230769	0.84108527131783	1.12252219819919	15.1413956842496	0.0467212170119605	0
1297	AP2_Mid	Law	289	5	92	60	1	78	284	59	1.73010380622837	1.66666666666667	0.96271186440678	1.10474896664488	16.5556506231713	0.0559817403112148	0
1298	Law_Mid	Sports Science	37	1	130	29	1	117	36	28	2.7027027027027	3.44827586206897	1.28571428571429	1.43648601228556	51.9491788001631	0.0318207383190551	0
1299	Physics-Maths_Low	Law	565	6	92	160	3	78	559	157	1.06194690265487	1.875	1.78025477707006	0.712852253638329	11.1601683321517	0.283983805347293	0
1300	Sports Science_Low	Law	54	1	92	45	2	78	53	43	1.85185185185185	4.44444444444444	2.46511627906977	1.24182274841532	60.3362181193763	0.100715597674878	0
1301	Optometry_Mid	Engineering	69	3	612	111	1	346	66	110	4.34782608695652	0.900900900900901	0.2	1.16515053000707	4.01816247489729	0.00995479905302298	0
1302	Chemistry_Mid	Japanese	230	2	53	221	NA	NA	228	NA	0.869565217391304	NA	NA	NA	NA	NA	NA
1303	Japanese_Mid	Sports Science	20	2	130	11	NA	NA	18	NA	10	NA	NA	NA	NA	NA	NA
1304	Sports Science_Mid	Japanese	47	1	53	40	1	32	46	39	2.12765957446809	2.5	1.17948717948718	1.43086692465645	46.9724885980972	0.0296171237269932	0
1305	Physics-Maths_Mid	Law	554	5	92	180	5	78	549	175	0.902527075812274	2.77777777777778	3.13714285714286	0.63838529066627	16.2347594883229	0.606209492244169	0
1306	AP1_Mid	PLS	422	3	1953	93	1	2274	419	92	0.710900473933649	1.0752688172043	1.51811594202899	1.16042644462956	30.1314099959853	0.0764874930761497	0
1307	PLS_Mid	AP1	649	3	1322	833	1	368	646	832	0.462249614791988	0.120048019207683	0.258814102564103	1.15589067131211	5.077267651044	0.0131930684552917	0
1308	Ancient History_Mid	Chemistry	24	4	839	21	4	820	20	17	16.6666666666667	19.047619047619	1.17647058823529	0.780271445980029	8.77334285334691	0.157760054305263	0
1309	Ancient History_Mid	Finance-Marketing	24	3	1009	21	3	413	21	18	12.5	14.2857142857143	1.16666666666667	0.877405989175632	11.1726754110687	0.121824993659322	0
1310	Chemistry_Low	Ancient History	338	4	76	317	7	72	334	310	1.18343195266272	2.20820189274448	1.88548387096774	0.63172538439167	9.5915005625149	0.370645802969892	0
1311	Physics-Maths_Mid	Sports Science	554	7	130	180	4	117	547	176	1.26353790613718	2.22222222222222	1.77597402597403	0.632745695049647	9.05818876223773	0.348202474437639	0
1312	Optometry_Top	Physics-Maths	63	1	1600	119	NA	NA	62	NA	1.58730158730159	NA	NA	NA	NA	NA	NA
1313	Physics-Maths_Low	Optometry	565	2	213	160	2	337	563	158	0.353982300884956	1.25	3.56329113924051	1.00404447752992	47.280555621486	0.268546838675895	0
1314	Chinese_Mid	Geography-Geology	16	2	913	6	1	554	14	5	12.5	16.6666666666667	1.4	1.33095025129738	43.1062989478003	0.045468992881376	0
1315	Geography-Geology_Mid	Chinese	343	1	45	181	NA	NA	342	NA	0.291545189504373	NA	NA	NA	NA	NA	NA
1316	Statistics_Mid	Chinese	310	3	45	161	2	17	307	159	0.967741935483871	1.24223602484472	1.28721174004193	0.91808494732223	13.6883783418724	0.12104531466911	0
1317	PLS_Top	Chemical Materials	578	1	13	478	1	7	577	477	0.173010380622837	0.209205020920502	1.20964360587002	1.41556686112375	46.3124323818124	0.0315949212332208	0
1318	HighSchool_Mid	Nursing	1393	8	14	954	31	58	1385	923	0.574300071787509	3.24947589098532	5.8145991332611	0.398827669295165	16.2379824778872	2.08212831406626	1
1319	Medical Science_Low	Nursing	578	3	14	789	10	58	575	779	0.519031141868512	1.26742712294043	2.46041934103552	0.660572600715177	13.4813364816709	0.449040296707387	0
1320	Nursing_Low	Biological Science	9	7	2721	16	16	2890	2	0	77.7777777777778	100	Inf	Inf	Inf	NA	NA
1321	Nursing_Low	Medical Science	9	9	1800	16	16	2282	0	0	100	100	NA	Inf	NA	NA	NA
1322	Nursing_Low	Optometry	9	4	213	16	4	337	5	12	44.4444444444444	25	0.416666666666667	0.885061203156784	4.06967791831841	0.042659668552554	0
1323	Nursing_Low	Pharmacy	9	6	272	16	11	375	3	5	66.6666666666667	68.75	1.1	0.889330698283316	10.8627198298126	0.111390150805434	0
1324	Optometry_Low	Nursing	81	2	14	107	2	58	79	105	2.46913580246914	1.86915887850467	0.752380952380952	1.01103018618235	10.1643879293826	0.0556921972516702	0
1325	Pharmacy_Low	Nursing	137	5	14	149	9	58	132	140	3.64963503649635	6.04026845637584	1.69714285714286	0.570814966368022	7.38015545886106	0.390275502136309	0
1326	AP1_Mid	Chemical Materials	422	1	13	93	2	7	421	91	0.23696682464455	2.1505376344086	9.25274725274725	1.23018872857018	219.786469929402	0.389529581828772	0
1327	AP2_Top	Chemical Materials	305	2	13	83	1	7	303	82	0.655737704918033	1.20481927710843	1.84756097560976	1.23105460966775	43.9842668146475	0.0776068764083463	0
1328	Chemical Materials_Low	Geography-Geology	6	1	913	1	1	554	5	0	16.6666666666667	100	Inf	Inf	Inf	NA	NA
1329	Chemistry_Top	Chemical Materials	271	3	13	282	4	7	268	278	1.1070110701107	1.41843971631206	1.28537170263789	0.768545248452603	9.30034925762561	0.177647136486574	0
1330	Geography-Geology_Top	Chemical Materials	246	1	13	207	1	7	245	206	0.40650406504065	0.483091787439614	1.18932038834951	1.41736939489503	45.7461773760983	0.0309202444286173	0
1331	Liberal Arts_Mid	Chemical Materials	1287	1	13	767	2	7	1286	765	0.0777000777000777	0.260756192959583	3.36209150326797	1.22559568966244	78.922957287036	0.143223970121092	0
1332	Ancient History_Top	Engineering	17	1	612	29	NA	NA	16	NA	5.88235294117647	NA	NA	NA	NA	NA	NA
1333	Engineering_Top	Ancient History	182	1	76	133	NA	NA	181	NA	0.549450549450549	NA	NA	NA	NA	NA	NA
1334	Law_Mid	Ancient History	37	2	76	29	2	72	35	27	5.40540540540541	6.89655172413793	1.2962962962963	1.03228313248278	18.4975864540151	0.090843423922841	0
1335	Chinese_Mid	Chemistry	16	2	839	6	3	820	14	3	12.5	50	7	1.11269728052837	122.867390334821	0.398803945184089	0
1336	Chinese_Mid	Finance-Marketing	16	3	1009	6	3	413	13	3	18.75	50	4.33333333333333	1.03774904332554	62.7112498730343	0.299432363663544	0
1337	Chinese_Mid	Optometry	16	1	213	6	NA	NA	15	NA	6.25	NA	NA	NA	NA	NA	NA
1338	Chinese_Mid	Pharmacy	16	1	272	6	1	375	15	5	6.25	16.6666666666667	3	1.50554530541816	144.805498184747	0.062152336153131	0
1339	Optometry_Low	Chinese	81	1	45	107	NA	NA	80	NA	1.23456790123457	NA	NA	NA	NA	NA	NA
1340	Pharmacy_Low	Chinese	137	2	45	149	3	17	135	146	1.45985401459854	2.01342281879195	1.38698630136986	0.920646542278433	14.8470042546662	0.129570313794653	0
1341	Ancient History_Mid	Food Science	24	2	297	21	1	341	22	20	8.33333333333333	4.76190476190476	0.55	1.26311303748103	14.2204215778143	0.0212722244797537	0
1342	Food Science_Top	Ancient History	80	2	76	101	NA	NA	78	NA	2.5	NA	NA	NA	NA	NA	NA
1343	Food Science_Top	Sports Science	80	3	130	101	7	117	77	94	3.75	6.93069306930693	1.9113475177305	0.706976510960463	11.8020472914062	0.309543695541254	0
1344	Sports Science_Top	Ancient History	29	1	76	32	NA	NA	28	NA	3.44827586206897	NA	NA	NA	NA	NA	NA
1345	Statistics_Mid	Ancient History	310	4	76	161	2	72	306	159	1.29032258064516	1.24223602484472	0.962264150943396	0.871525835550679	9.07671865521784	0.102013991108838	0
1346	PLS_Mid	Ancient History	649	1	76	833	4	72	648	829	0.154083204930663	0.480192076830732	3.12665862484922	1.11926291928847	55.8163545927928	0.175145693903956	0
1347	Optometry_Mid	Sports Science	69	2	130	111	4	117	67	107	2.89855072463768	3.6036036036036	1.25233644859813	0.879926796686436	12.0712002020631	0.129924659870965	0
1348	PLS_Mid	Sports Science	649	16	130	833	19	117	633	814	2.4653312788906	2.28091236494598	0.923449017199017	0.343423730989624	2.23597286646948	0.381381232372603	0
1349	Sports Science_Top	Optometry	29	6	213	32	7	337	23	25	20.6896551724138	21.875	1.07333333333333	0.626898772046472	5.39263109125536	0.213633090220577	0
1350	Sports Science_Top	Population Health	29	5	87	32	7	115	24	25	17.2413793103448	21.875	1.344	0.651554916736732	7.19512816106235	0.251049871463762	0
1351	Japanese_Top	Statistics	16	4	934	9	2	532	12	7	25	22.2222222222222	0.857142857142857	0.988023520059354	10.9136018161024	0.0673191023395246	0
1352	Physics-Maths_Top	Sports Science	481	3	130	211	1	117	478	210	0.623700623700624	0.4739336492891	0.758730158730159	1.1576645836789	14.9524806536078	0.0385000634411648	0
1353	Sports Science_Top	Physics-Maths	29	3	1600	32	2	551	26	30	10.3448275862069	6.25	0.577777777777778	0.951382260255154	6.69421264243125	0.0498680245646612	0
1354	Ancient History_Top	Nursing	17	1	14	29	1	58	16	28	5.88235294117647	3.44827586206897	0.571428571428571	1.44852141361952	23.8152671553586	0.0137109783448903	0
1355	Medical Science_Top	Nursing	663	5	14	694	7	58	658	687	0.754147812971342	1.00864553314121	1.34090247452693	0.588075253493751	6.09602337873058	0.294949565394687	0
1356	Nursing_Top	Ancient History	3	1	76	19	NA	NA	2	NA	33.3333333333333	NA	NA	NA	NA	NA	NA
1357	PLS_Top	Ancient History	578	1	76	478	1	72	577	477	0.173010380622837	0.209205020920502	1.20964360587002	1.41556686112375	46.3124323818124	0.0315949212332208	0
1358	PLS_Top	Nursing	578	3	14	478	4	58	575	474	0.519031141868512	0.836820083682008	1.61744022503516	0.766278127320274	11.6349205640482	0.224850085323794	0
1359	Surgery_Mid	Law	74	1	92	43	NA	NA	73	NA	1.35135135135135	NA	NA	NA	NA	NA	NA
1360	Engineering_Low	Sports Science	186	3	130	134	2	117	183	132	1.61290322580645	1.49253731343284	0.924242424242424	0.919985636726687	9.87673643371839	0.0864884938969577	0
1361	Sports Science_Mid	Engineering	47	3	612	40	1	346	44	39	6.38297872340426	2.5	0.376068376068376	1.17545805186814	7.75874180626178	0.0182281389186794	0
1362	Chinese_Top	Physics-Maths	11	2	1600	7	2	551	9	5	18.1818181818182	28.5714285714286	1.8	1.14503760248784	34.3382018617903	0.0943555522517123	0
1363	Engineering_Mid	Law	244	2	92	79	3	78	242	76	0.819672131147541	3.79746835443038	4.77631578947368	0.922292502124534	51.3452632104936	0.444309583675739	0
1364	AP1_Top	Japanese	438	3	53	130	1	32	435	129	0.684931506849315	0.769230769230769	1.12403100775194	1.15904448658908	22.2304037682611	0.0568341321893437	0
1365	AP2_Top	Japanese	305	3	53	83	1	32	302	82	0.983606557377049	1.20481927710843	1.22764227642276	1.16139558874774	24.427001088835	0.061698345751879	0
1366	Sports Science_Low	Ancient History	54	1	76	45	1	72	53	44	1.85185185185185	2.22222222222222	1.20454545454545	1.42884400732045	47.7211930747701	0.0304043058980689	0
1367	HighSchool_Low	Nursing	1576	1	14	758	4	58	1575	754	0.0634517766497462	0.527704485488127	8.35543766578249	1.11891071162174	149.0240387459	0.468470316428715	0
1368	Liberal Arts_Mid	Nursing	1287	1	14	767	11	58	1286	756	0.0777000777000777	1.43415906127771	18.7116402116402	1.04547092126396	276.229881676921	1.26751485858209	1
1369	Nursing_Mid	Biological Science	2	2	2721	23	21	2890	0	2	100	91.304347826087	0	Inf	NA	0	NA
1370	Nursing_Mid	Liberal Arts	2	1	3933	23	14	2408	1	9	50	60.8695652173913	1.55555555555556	1.4773421007132	69.8247590891031	0.0346546571443507	0
1371	Nursing_Mid	Medical Science	2	2	1800	23	23	2282	0	0	100	100	NA	Inf	NA	NA	NA
1372	Nursing_Mid	Psychology	2	1	694	23	14	746	1	9	50	60.8695652173913	1.55555555555556	1.4773421007132	69.8247590891031	0.0346546571443507	0
1373	Psychology_Mid	Nursing	233	3	14	248	14	58	230	234	1.28755364806867	5.64516129032258	4.58689458689459	0.642948858870101	24.0178317992844	0.875999221208207	0
1374	Japanese_Top	Sports Science	16	1	130	9	1	117	15	8	6.25	11.1111111111111	1.875	1.48042786608016	84.8351884258613	0.0414406458597349	0
1375	Ancient History_Low	Law	35	3	92	22	2	78	32	20	8.57142857142857	9.09090909090909	1.06666666666667	0.956338503529652	12.5172809770158	0.0908965597134845	0
1376	Japanese_Mid	Statistics	20	2	934	11	4	532	18	7	10	36.3636363636364	5.14285714285714	0.97386482553417	63.1372365503093	0.418912531446661	0
1377	Chinese_Low	Statistics	18	1	934	4	1	532	17	3	5.55555555555556	25	5.66666666666667	1.54665990532667	304.067681033173	0.105605143571993	0
1378	AP1_Low	Chemical Materials	473	1	13	152	NA	NA	472	NA	0.211416490486258	NA	NA	NA	NA	NA	NA
1379	Biological Science_Mid	Japanese	795	1	53	966	4	32	794	962	0.125786163522013	0.41407867494824	3.3014553014553	1.11906163676686	58.9062434787019	0.185033138489779	0
1380	Food Science_Top	Optometry	80	3	213	101	15	337	77	86	3.75	14.8514851485149	4.47674418604651	0.651624830683851	23.9706454872066	0.836074210767393	0
1381	Population Health_Top	Optometry	18	2	213	45	13	337	16	32	11.1111111111111	28.8888888888889	3.25	0.818946321148753	26.7742812874075	0.394501719266233	0
1382	Population Health_Top	Sports Science	18	2	130	45	5	117	16	40	11.1111111111111	11.1111111111111	1	0.887411967464942	9.82652946347119	0.101765328615496	0
1383	Medical Science_Top	Sports Science	663	4	130	694	11	117	659	683	0.603318250377074	1.5850144092219	2.65336749633968	0.586421921857703	12.0115181515603	0.586133990874195	0
1384	Optometry_Top	Sports Science	63	2	130	119	3	117	61	116	3.17460317460317	2.52100840336134	0.788793103448276	0.926470434288897	8.57122059939937	0.0725911266466719	0
1385	Sports Science_Top	Chemistry	29	3	839	32	7	820	26	25	10.3448275862069	21.875	2.42666666666667	0.744749632193273	16.5146666909517	0.356574626742998	0
1386	PLS_Top	Population Health	578	2	87	478	4	115	576	474	0.346020761245675	0.836820083682008	2.43037974683544	0.868242947424545	22.7319883099376	0.259842897739204	0
1387	Engineering_Low	Law	186	3	92	134	2	78	183	132	1.61290322580645	1.49253731343284	0.924242424242424	0.919985636726687	9.87673643371839	0.0864884938969577	0
1388	Physics-Maths_Top	Optometry	481	2	213	211	1	337	479	210	0.415800415800416	0.4739336492891	1.14047619047619	1.22753801873267	26.9061876513527	0.0483415174939394	0
1389	Surgery_Low	Geography-Geology	72	1	913	47	1	554	71	46	1.38888888888889	2.12765957446809	1.54347826086957	1.42682291735066	60.8314845376172	0.039162699379854	0
1390	Engineering_Low	Japanese	186	1	53	134	NA	NA	185	NA	0.537634408602151	NA	NA	NA	NA	NA	NA
1391	Japanese_Mid	Engineering	20	1	612	11	NA	NA	19	NA	5	NA	NA	NA	NA	NA	NA
1392	Sports Science_Low	Engineering	54	1	612	45	1	346	53	44	1.85185185185185	2.22222222222222	1.20454545454545	1.42884400732045	47.7211930747701	0.0304043058980689	0
1393	Psychology_Mid	Japanese	233	1	53	248	3	32	232	245	0.429184549356223	1.20967741935484	2.84081632653061	1.15832867132519	56.0804786855415	0.143904574109199	0
1394	Engineering_Mid	Sports Science	244	1	130	79	NA	NA	243	NA	0.409836065573771	NA	NA	NA	NA	NA	NA
1395	Engineering_Mid	Population Health	244	1	87	79	3	115	243	76	0.409836065573771	3.79746835443038	9.59210526315789	1.16215595098404	191.232882514003	0.481133172129874	0
1396	Biological Science_Top	Nursing	952	3	14	981	15	58	949	966	0.315126050420168	1.52905198776758	4.9120082815735	0.63410483160684	25.1410713653615	0.959697580409764	0
1397	Liberal Arts_Top	Nursing	1026	5	14	877	22	58	1021	855	0.487329434697856	2.50855188141391	5.25426900584795	0.497597797450211	18.9225667659873	1.45896395173184	1
1398	Nursing_Top	Liberal Arts	3	1	3933	19	10	2408	2	9	33.3333333333333	52.6315789473684	2.22222222222222	1.30809445802324	64.5119788799851	0.076548134015935	0
1399	Nursing_Top	Psychology	3	1	694	19	11	746	2	8	33.3333333333333	57.8947368421053	2.75	1.30992713190814	80.2112096531727	0.0942823332636385	0
1400	Psychology_Top	Nursing	143	3	14	256	19	58	140	237	2.0979020979021	7.421875	3.74120956399437	0.630338939544638	18.9637970153624	0.738072074404951	0
1401	PLS_Top	Sports Science	578	4	130	478	5	117	574	473	0.69204152249135	1.04602510460251	1.5169133192389	0.673688596596089	8.59710651907575	0.267651216485306	0
1402	Nursing_Mid	Pharmacy	2	1	272	23	15	375	1	8	50	65.2173913043478	1.875	1.48042786608016	84.8351884258613	0.0414406458597349	0
1403	PLS_Mid	Nursing	649	3	14	833	26	58	646	807	0.462249614791988	3.12124849939976	6.93762907889302	0.612031058675912	33.5467524346157	1.43473492196036	1
1404	Chinese_Mid	Food Science	16	1	297	6	NA	NA	15	NA	6.25	NA	NA	NA	NA	NA	NA
1405	Food Science_Low	Chinese	126	2	45	110	NA	NA	124	NA	1.58730158730159	NA	NA	NA	NA	NA	NA
1406	Sports Science_Top	Engineering	29	2	612	32	NA	NA	27	NA	6.89655172413793	NA	NA	NA	NA	NA	NA
1407	Statistics_Low	Law	343	1	92	170	3	78	342	167	0.291545189504373	1.76470588235294	6.1437125748503	1.1585531208769	121.352981290536	0.311036480529526	0
1408	Chemistry_Top	Nursing	271	1	14	282	5	58	270	277	0.3690036900369	1.77304964539007	4.87364620938628	1.09877832705553	82.5328633296882	0.287793569930842	0
1409	Nursing_Low	Chemistry	9	1	839	16	5	820	8	11	11.1111111111111	31.25	3.63636363636364	1.1899197833926	77.8689763247975	0.169812692036852	0
1410	Nursing_Low	Liberal Arts	9	5	3933	16	12	2408	4	4	55.5555555555556	75	2.4	0.885061203156784	23.441344809514	0.245719690862711	0
1411	Nursing_Low	Psychology	9	4	694	16	10	746	5	6	44.4444444444444	62.5	2.08333333333333	0.84656167328002	18.4278937942612	0.235527609733101	0
1412	Nursing_Low	Sports Science	9	1	130	16	2	117	8	14	11.1111111111111	12.5	1.14285714285714	1.30247018062932	32.7005568805691	0.039941902327532	0
1413	Sports Science_Top	Nursing	29	1	14	32	4	58	28	28	3.44827586206897	12.5	4	1.14953406710222	77.1957639111583	0.207265258990296	0
1414	Japanese_Top	Geography-Geology	16	1	913	9	1	554	15	8	6.25	11.1111111111111	1.875	1.48042786608016	84.8351884258613	0.0414406458597349	0
1415	Engineering_Top	Optometry	182	1	213	133	NA	NA	181	NA	0.549450549450549	NA	NA	NA	NA	NA	NA
1416	Chemical Materials_Top	Chemistry	5	2	839	1	1	820	3	0	40	100	Inf	Inf	Inf	NA	NA
1417	Chemical Materials_Top	Liberal Arts	5	3	3933	1	1	2408	2	0	60	100	Inf	Inf	Inf	NA	NA
1418	Liberal Arts_Top	Chemical Materials	1026	3	13	877	3	7	1023	874	0.292397660818713	0.342075256556442	1.17048054919908	0.81779480833088	9.61415048216242	0.142500860434342	0
1419	Ancient History_Low	Japanese	35	1	53	22	NA	NA	34	NA	2.85714285714286	NA	NA	NA	NA	NA	NA
1420	Geography-Geology_Low	Ancient History	324	5	76	166	12	72	319	154	1.54320987654321	7.2289156626506	4.97142857142857	0.541259305753799	20.0343830507684	1.23363429650849	1
1421	Japanese_Mid	Ancient History	20	1	76	11	NA	NA	19	NA	5	NA	NA	NA	NA	NA	NA
1422	Japanese_Mid	Geography-Geology	20	1	913	11	1	554	19	10	5	9.09090909090909	1.9	1.46718491641216	83.0842410868423	0.0434498763276506	0
1423	Ancient History_Top	Psychology	17	1	694	29	10	746	16	19	5.88235294117647	34.4827586206897	8.42105263157895	1.10233006805919	143.916714585328	0.492744207148906	0
1424	Food Science_Low	Nursing	126	1	14	110	NA	NA	125	NA	0.793650793650794	NA	NA	NA	NA	NA	NA
1425	Nursing_Low	Food Science	9	1	297	16	1	341	8	15	11.1111111111111	6.25	0.533333333333333	1.48042786608016	24.1308980411339	0.0117875614889913	0
1426	Optometry_Mid	Nursing	69	2	14	111	3	58	67	108	2.89855072463768	2.7027027027027	0.930555555555556	0.926022659402523	10.0999941873425	0.0857360534979822	0
1427	Japanese_Top	Chemistry	16	1	839	9	2	820	15	7	6.25	22.2222222222222	4.28571428571429	1.30748759440532	124.221689536328	0.147859419778734	0
1428	Japanese_Top	Optometry	16	1	213	9	NA	NA	15	NA	6.25	NA	NA	NA	NA	NA	NA
1429	Japanese_Top	Pharmacy	16	1	272	9	1	375	15	8	6.25	11.1111111111111	1.875	1.48042786608016	84.8351884258613	0.0414406458597349	0
1430	Optometry_Low	Japanese	81	1	53	107	NA	NA	80	NA	1.23456790123457	NA	NA	NA	NA	NA	NA
1431	Pharmacy_Mid	Japanese	62	1	53	90	1	32	61	89	1.61290322580645	1.11111111111111	0.685393258426966	1.42394852353557	26.8134852663937	0.0175196888442513	0
1432	Computer Science_Top	Nursing	947	1	14	517	7	58	946	510	0.105596620908131	1.35396518375242	12.9843137254902	1.07045551501373	204.417596576281	0.824745059846357	0
1433	Nursing_Low	Computer Science	9	1	3166	16	2	1224	8	14	11.1111111111111	12.5	1.14285714285714	1.30247018062932	32.7005568805691	0.039941902327532	0
1434	Ancient History_Low	Chemistry	35	2	839	22	3	820	33	19	5.71428571428571	13.6363636363636	2.60526315789474	0.957218858247022	30.6420194117353	0.22150616219779	0
1435	Chemistry_Mid	Ancient History	230	1	76	221	2	72	229	219	0.434782608695652	0.904977375565611	2.09132420091324	1.22838634894431	49.4465507237139	0.0884518100719181	0
1436	Chinese_Top	Food Science	11	1	297	7	1	341	10	6	9.09090909090909	14.2857142857143	1.66666666666667	1.50554530541816	80.4474989915261	0.0345290756406283	0
1437	AP1_Mid	Law	422	2	92	93	2	78	420	91	0.4739336492891	2.1505376344086	4.61538461538461	1.0066627853308	61.6548488014635	0.345500403650708	0
1438	Law_Top	Optometry	21	1	213	24	2	337	20	22	4.76190476190476	8.33333333333333	1.81818181818182	1.26311303748103	47.0096581084772	0.0703214032388552	0
1439	Optometry_Top	Law	63	1	92	119	NA	NA	62	NA	1.58730158730159	NA	NA	NA	NA	NA	NA
1440	Ancient History_Low	Food Science	35	1	297	22	1	341	34	21	2.85714285714286	4.54545454545455	1.61904761904762	1.44119076194823	66.2148195994986	0.0395880440149023	0
1441	Food Science_Mid	Ancient History	91	1	76	130	1	72	90	129	1.0989010989011	0.769230769230769	0.697674418604651	1.42086700612535	27.0782224918622	0.0179756848708079	0
1442	Nursing_Low	Population Health	9	1	87	16	2	115	8	14	11.1111111111111	12.5	1.14285714285714	1.30247018062932	32.7005568805691	0.039941902327532	0
1443	Population Health_Mid	Nursing	24	1	14	23	1	58	23	22	4.16666666666667	4.34782608695652	1.04545454545455	1.44531408570044	43.2127475219839	0.0252928885407144	0
1444	Geography-Geology_Top	Chinese	246	1	45	207	3	17	245	204	0.40650406504065	1.44927536231884	3.60294117647059	1.15858401800245	71.1723465430301	0.182390854757879	0
1445	Engineering_Top	Sports Science	182	2	130	133	NA	NA	180	NA	1.0989010989011	NA	NA	NA	NA	NA	NA
1446	Chinese_Mid	Psychology	16	1	694	6	1	746	15	5	6.25	16.6666666666667	3	1.50554530541816	144.805498184747	0.062152336153131	0
1447	Liberal Arts_Low	Nursing	1620	1	14	764	3	58	1619	761	0.0617283950617284	0.392670157068063	6.38239159001314	1.15553669738592	125.092051746278	0.325639573734807	0
